# Supplementary material for: Narciclasine Targets STAT3 via Distinct Mechanisms in Tamoxifen-Resistant Breast Cancer Cells
Source: Research Square preprint supplement (doi:10.21203/rs.3.rs-680769/v1), 2021-07-09
Supplement: Supplementary file 1 [file 22cd8eea25f90222ea060469.xlsx]

## Sheet: Upregulated
210538_s_at
205306_x_at
202643_s_at
217767_at
202861_at
211138_s_at
202644_s_at
205207_at
221530_s_at
203946_s_at
204753_s_at
36829_at
203535_at
205278_at
208180_s_at
202917_s_at
203927_at
202307_s_at
207046_at
204440_at
220030_at
31637_s_at
202531_at
209716_at
218574_s_at
204755_x_at
36711_at
207850_at
202267_at
209016_s_at
209782_s_at
202672_s_at
210056_at
221756_at
202510_s_at
207535_s_at
218872_at
222379_at
206213_at
204908_s_at
219911_s_at
205802_at
203180_at
205174_s_at
201195_s_at
203414_at
201466_s_at
210091_s_at
205938_at
217997_at
202656_s_at
202073_at
214185_at
38766_at
205298_s_at
214472_at
205100_at
218000_s_at
205068_s_at
214502_at
209101_at
205896_at
211000_s_at
213295_at
214023_x_at
201465_s_at
205803_s_at
217853_at
209383_at
218371_s_at
208576_s_at
221903_s_at
205870_at
219290_x_at
204472_at
201170_s_at
211602_s_at
202023_at
202912_at
220987_s_at
203499_at
212665_at
204341_at
204549_at
39582_at
202131_s_at
219207_at
208891_at
212848_s_at
209398_at
222142_at
213689_x_at
202657_s_at
221757_at
205481_at
201009_s_at
207038_at
214969_at
219387_at
205691_at
221696_s_at
208081_s_at
201008_s_at
209277_at
204857_at
209631_s_at
204255_s_at
218683_at
204254_s_at
212642_s_at
219499_at
203045_at
207517_at
208003_s_at
210367_s_at
218851_s_at
212845_at
218855_at
203395_s_at
206036_s_at
214016_s_at
206864_s_at
210650_s_at
218723_s_at
221489_s_at
206951_at
201473_at
207156_at
202387_at
207030_s_at
211475_s_at
219312_s_at
221563_at
205122_at
206110_at
202129_s_at
214790_at
209750_at
203071_at
212195_at
41386_i_at
203278_s_at
208181_at
215501_s_at
202935_s_at
202504_at
206652_at
203394_s_at
214522_x_at
210827_s_at
215623_x_at
206374_at
60084_at
212975_at
214079_at
200924_s_at
209403_at
219998_at
206324_s_at
208118_x_at
202074_s_at
202150_s_at
213139_at
219736_at
206935_at
204464_s_at
218929_at
216468_s_at
204156_at
221125_s_at
209672_s_at
203241_at
209305_s_at
219327_s_at
203455_s_at
202147_s_at
203592_s_at
201531_at
208506_at
219682_s_at
213424_at
206463_s_at
202936_s_at
206670_s_at
204121_at
212641_at
207608_x_at
212196_at
205251_at
219165_at
210611_s_at
213281_at
217892_s_at
208580_x_at
209348_s_at
210346_s_at
214934_at
219209_at
206744_s_at
210829_s_at
203759_at
220370_s_at
207000_s_at
204346_s_at
202435_s_at
214463_x_at
201464_x_at
219484_at
220369_at
215071_s_at
205625_s_at
209278_s_at
213353_at
201328_at
221569_at
220172_at
212774_at
213112_s_at
218560_s_at
200898_s_at
207781_s_at
218627_at
212157_at
219248_at
203821_at
218344_s_at
221215_s_at
211778_s_at
203787_at
221220_s_at
213988_s_at
206648_at
218880_at
218974_at
217936_at
208436_s_at
214814_at
206277_at
216305_s_at
201711_x_at
206748_s_at
215359_x_at
209304_x_at
211363_s_at
212457_at
207196_s_at
218943_s_at
202871_at
209239_at
218368_s_at
222239_s_at
209578_s_at
219634_at
220294_at
202393_s_at
218631_at
201846_s_at
202130_at
217739_s_at
206238_s_at
221194_s_at
208892_s_at
212468_at
206669_at
205204_at
215948_x_at
201693_s_at
219563_at
37028_at
201843_s_at
220625_s_at
201502_s_at
211799_x_at
201236_s_at
220073_s_at
213649_at
219506_at
32541_at
210233_at
205192_at
218819_at
216321_s_at
211458_s_at
202794_at
219760_at
219033_at
207935_s_at
209122_at
201471_s_at
210676_x_at
203944_x_at
207574_s_at
209723_at
211250_s_at
222270_at
205593_s_at
41387_r_at
221875_x_at
215417_at
205807_s_at
222303_at
204483_at
221905_at
212926_at
215343_at
211256_x_at
220121_at
220746_s_at
202436_s_at
216350_s_at
208078_s_at
201294_s_at
203984_s_at
220046_s_at
218809_at
210971_s_at
220123_at
205548_s_at
215338_s_at
213286_at
215629_s_at
203911_at
202821_s_at
208056_s_at
204684_at
220520_s_at
217996_at
219239_s_at
222016_s_at
210001_s_at
205672_at
214542_x_at
221571_at
217503_at
206235_at
218757_s_at
221683_s_at
206565_x_at
206675_s_at
202437_s_at
209140_x_at
210592_s_at
210240_s_at
202146_at
214693_x_at
206609_at
216250_s_at
214681_at
215184_at
213387_at
201694_s_at
65588_at
219832_s_at
202949_s_at
213012_at
204924_at
214012_at
217967_s_at
214683_s_at
205933_at
209824_s_at
204884_s_at
221610_s_at
208729_x_at
208490_x_at
218100_s_at
217943_s_at
213134_x_at
214409_at
206536_s_at
208960_s_at
214791_at
216074_x_at
213480_at
204157_s_at
209475_at
210272_at
205126_at
216870_x_at
208523_x_at
214586_at
222133_s_at
212572_at
218064_s_at
203340_s_at
204519_s_at
214787_at
202837_at
214212_x_at
210681_s_at
201041_s_at
205965_at
213922_at
221808_at
201631_s_at
205062_x_at
219901_at
45749_at
209288_s_at
210764_s_at
204613_at
210117_at
219947_at
201289_at
200790_at
210170_at
215215_s_at
213437_at
205016_at
220244_at
205543_at
213077_at
221045_s_at
204233_s_at
219371_s_at
211671_s_at
219995_s_at
204401_at
206613_s_at
218029_at
214543_x_at
221525_at
215148_s_at
215444_s_at
204523_at
213926_s_at
218884_s_at
222193_at
214755_at
212842_x_at
211676_s_at
202663_at
221582_at
218686_s_at
213693_s_at
200730_s_at
202301_s_at
213558_at
208961_s_at
202398_at
215779_s_at
212724_at
205250_s_at
211899_s_at
210026_s_at
204087_s_at
211529_x_at
205741_s_at
219789_at
209706_at
202071_at
212078_s_at
217618_x_at
213932_x_at
203845_at
216944_s_at
210854_x_at
218747_s_at
204937_s_at
203991_s_at
211911_x_at
211089_s_at
220773_s_at
201556_s_at
211090_s_at
219045_at
209615_s_at
219203_at
220360_at
204806_x_at
205836_s_at
213191_at
203725_at
207387_s_at
212448_at
203140_at
210663_s_at
221978_at
214554_at
220173_at
219528_s_at
200931_s_at
210095_s_at
201642_at
64900_at
202669_s_at
201865_x_at
211126_s_at
211078_s_at
217388_s_at
208047_s_at
211504_x_at
206777_s_at
212569_at
214455_at
221772_s_at
213407_at
213055_at
217738_at
208496_x_at
221994_at
205590_at
206307_s_at
209760_at
210635_s_at
218166_s_at
202708_s_at
218518_at
204734_at
204512_at
218066_at
212470_at
205214_at
201510_at
208527_x_at
219360_s_at
218847_at
201842_s_at
208546_x_at
210665_at
203509_at
203992_s_at
218587_s_at
209324_s_at
202219_at
202207_at
216226_at
205139_s_at
201844_s_at
203569_s_at
218913_s_at
220066_at
219228_at
202771_at
221523_s_at
204500_s_at
220198_s_at
212723_at
213034_at
211197_s_at
216526_x_at
205165_at
218649_x_at
202206_at
218760_at
213186_at
219368_at
214748_at
204435_at
50221_at
220553_s_at
202379_s_at
209209_s_at
202622_s_at
221524_s_at
219475_at
202901_x_at
39248_at
209911_x_at
222014_x_at
218618_s_at
209743_s_at
212756_s_at
203599_s_at
212820_at
203339_at
218486_at
218746_at
209450_at
212986_s_at
215493_x_at
220731_s_at
206241_at
65630_at
211695_x_at
221604_s_at
218319_at
214481_at
216589_at
208107_s_at
203320_at
210286_s_at
210910_s_at
217836_s_at
213085_s_at
212990_at
214272_at
214469_at
201548_s_at
44783_s_at
57516_at
219654_at
218926_at
219467_at
215313_x_at
218706_s_at
210407_at
220841_s_at
206044_s_at
219054_at
221548_s_at
207347_at
213076_at
204148_s_at
222062_at
220735_s_at
202501_at
205621_at
212579_at
213572_s_at
221918_at
212505_s_at
209459_s_at
210655_s_at
205025_at
203674_at

## Sheet: Downregulated
203337_x_at
221989_at
220924_s_at
217980_s_at
209380_s_at
201036_s_at
209591_s_at
220940_at
204558_at
215135_at
203022_at
207980_s_at
218350_s_at
38703_at
219889_at
210980_s_at
222036_s_at
218695_at
212981_s_at
219411_at
217142_at
221521_s_at
219539_at
220251_at
208646_at
201457_x_at
213073_at
212464_s_at
210985_s_at
220232_at
202534_x_at
211814_s_at
203790_s_at
217286_s_at
200963_x_at
214633_at
211829_s_at
216547_at
212014_x_at
207711_at
211569_s_at
218237_s_at
221740_x_at
214005_at
221844_x_at
212605_s_at
203063_at
212109_at
212136_at
212044_s_at
221253_s_at
218041_x_at
209635_at
201128_s_at
204477_at
203343_at
217948_at
204975_at
220751_s_at
209443_at
201937_s_at
206115_at
214804_at
209343_at
201513_at
218133_s_at
214040_s_at
216383_at
214862_x_at
214997_at
216687_x_at
220613_s_at
212330_at
201562_s_at
201202_at
202386_s_at
220414_at
200023_s_at
216594_x_at
204000_at
212989_at
203126_at
213679_at
219294_at
218025_s_at
218116_at
204568_at
214808_at
220144_s_at
219000_s_at
209279_s_at
208386_x_at
48808_at
201540_at
218477_at
203803_at
203324_s_at
204952_at
219008_at
218194_at
218590_at
220391_at
205534_at
209980_s_at
204151_x_at
204490_s_at
212732_at
206355_at
219347_at
200880_at
208962_s_at
203253_s_at
213664_at
211833_s_at
208613_s_at
212151_at
204932_at
204528_s_at
212295_s_at
209891_at
216246_at
201814_at
201825_s_at
41858_at
216559_x_at
217838_s_at
201381_x_at
209218_at
208289_s_at
213744_at
202317_s_at
212796_s_at
203058_s_at
204172_at
209835_x_at
203108_at
212173_at
213562_s_at
205527_s_at
204933_s_at
200881_s_at
203762_s_at
200950_at
222325_at
213441_x_at
213599_at
202590_s_at
209602_s_at
221539_at
202182_at
209146_at
221044_s_at
210299_s_at
201884_at
203178_at
55093_at
209482_at
218404_at
37590_g_at
217922_at
212320_at
204478_s_at
217678_at
219581_at
206852_at
200768_s_at
201625_s_at
203827_at
213792_s_at
221973_at
213264_at
217604_at
50314_i_at
220038_at
208614_s_at
211042_x_at
207886_s_at
201626_at
215303_at
39966_at
219330_at
216570_x_at
204017_at
202458_at
208389_s_at
213294_at
209160_at
204488_at
200769_s_at
213135_at
213657_s_at
222335_at
220192_x_at
209699_x_at
205431_s_at
220063_at
201930_at
201627_s_at
215554_at
222354_at
218452_at
208796_s_at
205222_at
215093_at
205195_at
212135_s_at
212141_at
203245_s_at
207522_s_at
218481_at
217523_at
204249_s_at
221729_at
213836_s_at
208478_s_at
204489_s_at
210691_s_at
204033_at
203426_s_at
213245_at
205034_at
213959_s_at
219959_at
221024_s_at
211653_x_at
205196_s_at
203231_s_at
218342_s_at
215011_at
214116_at
213036_x_at
218424_s_at
210567_s_at
204105_s_at
201380_at
220486_x_at
201729_s_at
209605_at
202729_s_at
201563_at
204060_s_at
203060_s_at
214404_x_at
221773_at
203188_at
216237_s_at
211708_s_at
63825_at
204547_at
212406_s_at
218885_s_at
218573_at
205229_s_at
220682_s_at
218287_s_at
203401_at
205430_at
204767_s_at
211986_at
220108_at
209213_at
218643_s_at
214918_at
221891_x_at
201506_at
218019_s_at
219283_at
218384_at
202589_at
203232_s_at
221593_s_at
222336_at
221815_at
220441_at
204768_s_at
217762_s_at
201491_at
217764_s_at
204029_at
220915_s_at
213262_at
212126_at
208433_s_at
203625_x_at
204573_at
212608_s_at
222108_at
202478_at
218858_at
212444_at
201847_at
205282_at
217763_s_at
213455_at
213996_at
36499_at
205304_s_at
208687_x_at
200962_at
200831_s_at
214117_s_at
202291_s_at
204061_at
219985_at
217092_x_at
204596_s_at
210338_s_at
204167_at
212148_at
211958_at
217626_at
208096_s_at
200762_at
201818_at
212063_at
204595_s_at
207302_at
201193_at
204597_x_at
211959_at
204602_at
200832_s_at
203424_s_at
201860_s_at
