# Supplementary material for: Narciclasine Targets STAT3 via Distinct Mechanisms in Tamoxifen-Resistant Breast Cancer Cells
Source: Research Square preprint supplement (doi:10.21203/rs.3.rs-680769/v1), 2021-07-09
Supplement: Supplementary file 2 [file 898bf5ef0fb141f5ee093513.docx]

**Supplementary Table 1.**

Primers sequences for qPCR analysis

| Gene | Forward primer | Reverse primer |
| --- | --- | --- |
| STAT3 | AGTGACCAGGCAGAAGATGC | CACGTACTCCATCGCTGACA |
| Cyclin D1 | GTGCCACAGATGTGAAGT | GTAGGACAGGAAGTTGTTGG |
| β-Actin | ATTCCTATGTGGGCGACGAG | CCAGATTTTCTCCATGTCGTCC |
