# Supplementary material for: Narciclasine Targets STAT3 via Distinct Mechanisms in Tamoxifen-Resistant Breast Cancer Cells
Source: Research Square preprint supplement (doi:10.21203/rs.3.rs-680769/v1), 2021-07-09
Supplement: Supplementary file 3 [file 9a91a76ac2a7e2c25c47c9ce.xlsx]

## Sheet: by cmap name
rank	cmap name	mean	n	enrichment	p	specificity	percent non-null
1	anisomycin	0.791	4	0.998	0	0.0052	100
2	emetine	0.749	4	0.997	0	0	100
3	cephaeline	0.807	5	0.997	0	0	100
4	cicloheximide	0.675	4	0.989	0	0.0056	100
5	puromycin	0.565	4	0.985	0	0.0169	100
6	digitoxigenin	0.472	4	0.984	0	0.0048	100
7	ouabain	0.5	4	0.979	0	0.0051	100
8	lanatoside C	0.505	6	0.974	0	0.0046	100
9	helveticoside	0.474	6	0.962	0	0.0085	100
10	digoxin	0.472	4	0.96	0	0.0047	100
11	digoxigenin	0.423	5	0.953	0	0.0044	100
12	phenoxybenzamine	0.375	4	0.952	0	0.1287	100
13	valinomycin	0.394	4	0.943	0	0.0116	100
14	niclosamide	0.354	5	0.935	0	0.0105	100
15	pyrvinium	0.384	6	0.934	0	0.0093	100
16	gossypol	0.342	6	0.903	0	0	100
17	thioridazine	0.283	20	0.703	0	0.0274	85
18	15-delta prostaglandin J2	0.272	15	0.689	0	0.0447	86
19	trichostatin A	0.16	182	0.586	0	0.1564	54
20	fluphenazine	0.145	18	0.561	0	0.0207	61
21	LY-294002	0.149	61	0.395	0	0.1477	57
22	thapsigargin	0.513	3	0.989	2e-05	0.051	100
23	rottlerin	0.421	3	0.966	4e-05	0.0155	100
24	trifluoperazine	0.179	16	0.566	4e-05	0.125	62
25	withaferin A	0.327	4	0.91	6e-05	0.0526	100
26	proscillaridin	0.463	3	0.963	8e-05	0.0347	100
27	5707885	0.31	4	0.906	8e-05	0	100
28	vorinostat	0.231	12	0.615	8e-05	0.2915	66
29	MG-262	0.379	3	0.959	0.0001	0.0757	100
30	suloctidil	0.371	4	0.902	0.0001	0.0136	100
31	loperamide	0.212	6	0.802	0.0001	0.0101	83
32	5224221	0.481	2	0.988	0.00018	0.0447	100
33	prochlorperazine	0.178	16	0.511	0.00018	0.1408	62
34	dydrogesterone	-0.389	4	-0.895	0.00022	0	75
35	clotrimazole	0.317	5	0.835	0.00024	0.0111	100
36	wortmannin	0.125	18	0.481	0.00024	0.1548	50
37	PNU-0251126	-0.499	6	-0.769	0.00026	0	83
38	astemizole	0.38	5	0.829	0.00032	0.0521	100
39	nocodazole	0.217	6	0.767	0.00042	0.0053	83
40	amrinone	-0.43	4	-0.866	0.00062	0.0171	75
41	calmidazolium	0.435	2	0.979	0.00076	0.0158	100
42	perhexiline	0.307	4	0.847	0.00076	0.0259	100
43	lycorine	0.489	5	0.794	0.00086	0.0185	80
44	clioquinol	0.266	5	0.782	0.00104	0.0262	80
45	glafenine	0.261	4	0.837	0.00109	0.0071	100
46	prenylamine	0.36	4	0.827	0.00143	0.0394	100
47	AR-A014418	0.332	3	0.91	0.00154	0.014	100
48	clomipramine	0.266	4	0.819	0.00193	0.0221	100
49	blebbistatin	0.353	2	0.961	0.00262	0	100
50	mefloquine	0.322	5	0.741	0.00268	0.0833	80
51	terfenadine	0.416	3	0.887	0.00282	0.0985	100
52	0297417-0002B	0.308	3	0.887	0.00292	0.0421	100
53	vanoxerine	0.232	4	0.802	0.00294	0.0104	75
54	syrosingopine	0.191	4	0.801	0.00298	0.0326	75
55	azacyclonol	0.317	5	0.735	0.00298	0.0095	80
56	chlorprothixene	0.222	4	0.799	0.00304	0.0094	75
57	menadione	0.335	2	0.954	0.00392	0.0711	100
58	5248896	0.333	2	0.952	0.0041	0	100
59	fendiline	0.362	3	0.866	0.00445	0	100
60	mebendazole	0.246	5	0.709	0.00491	0.0909	80
61	disulfiram	0.298	5	0.702	0.00557	0.0867	80
62	econazole	0.214	4	0.767	0.00567	0.0718	75
63	salsolinol	-0.414	3	-0.851	0.00655	0	66
64	alexidine	0.229	4	0.751	0.0074	0.041	75
65	tribenoside	0.145	4	0.748	0.00774	0.0212	50
66	chlorcyclizine	0.191	6	0.631	0.00779	0.025	66
67	benzethonium chloride	0.287	3	0.832	0.00951	0.0421	100
68	quinostatin	0.328	2	0.928	0.01006	0.1216	100
69	amphotericin B	0.175	4	0.731	0.01044	0.0128	75
70	strophanthidin	0.356	4	0.726	0.01142	0.1031	75
71	5230742	0.303	2	0.921	0.01241	0.0078	100
72	oxyphenbutazone	0.135	4	0.716	0.01315	0.0881	50
73	pridinol	-0.269	4	-0.715	0.01333	0.0107	50
74	etifenin	-0.246	4	-0.709	0.01472	0.0345	50
75	felodipine	0.263	7	0.553	0.01481	0.0743	57
76	5252917	0.293	2	0.913	0.01495	0.0137	100
77	rifabutin	0.182	3	0.797	0.01713	0.1042	66
78	bisacodyl	0.314	4	0.697	0.01743	0.0745	75
79	parthenolide	0.302	4	0.696	0.01763	0.2515	75
80	maprotiline	0.088	4	0.692	0.01866	0.0722	50
81	hexylcaine	-0.266	4	-0.693	0.01884	0.0059	50
82	ondansetron	-0.42	4	-0.693	0.01884	0.0301	75
83	dicycloverine	0.221	5	0.618	0.02393	0.0387	80
84	monorden	0.094	22	0.306	0.02516	0.2193	50
85	clofilium tosylate	0.212	3	0.766	0.02552	0.0169	66
86	securinine	0.238	4	0.671	0.02602	0.1429	75
87	daunorubicin	0.234	4	0.667	0.02759	0.197	75
88	cefadroxil	-0.292	4	-0.665	0.02853	0.03	50
89	glycocholic acid	-0.282	4	-0.664	0.02867	0.0116	75
90	metergoline	0.189	4	0.664	0.02875	0.1421	75
91	STOCK1N-35874	0.251	2	0.879	0.02915	0.0559	100
92	cyproheptadine	0.169	5	0.604	0.02942	0.0376	60
93	1,4-chrysenequinone	0.307	2	0.878	0.0297	0.1304	100
94	pimozide	0.297	4	0.661	0.0301	0.1457	75
95	gibberellic acid	-0.279	4	-0.66	0.03032	0.0481	50
96	STOCK1N-35696	0.28	2	0.876	0.03123	0.0482	100
97	mesoridazine	-0.265	4	-0.646	0.0371	0.0437	50
98	0198306-0000	-0.218	4	-0.646	0.03756	0.0852	50
99	homochlorcyclizine	0.211	4	0.644	0.03873	0.1413	75
100	phensuximide	-0.254	4	-0.643	0.03893	0.0667	50
101	spectinomycin	-0.232	4	-0.641	0.03991	0.0119	50
102	5155877	0.128	4	0.642	0.04018	0.1688	50
103	spiperone	0.317	2	0.855	0.04243	0.1061	100
104	beta-escin	0.182	6	0.526	0.04495	0.1885	66
105	tonzonium bromide	0.201	4	0.633	0.04496	0.1071	75
106	oxamniquine	-0.268	4	-0.631	0.04563	0.037	50
107	mepacrine	0.243	2	0.849	0.04607	0.0729	100
108	proadifen	0.147	4	0.631	0.04615	0.1523	75
109	diazoxide	-0.348	5	-0.565	0.04708	0.0854	60
110	doxycycline	-0.369	5	-0.56	0.05083	0.0961	60
111	piperlongumine	0.329	2	0.84	0.05167	0.2273	100
112	etoposide	0.223	4	0.621	0.0517	0.2615	75
113	(+/-)-catechin	-0.25	4	-0.609	0.05964	0.0321	50
114	propoxycaine	-0.216	4	-0.605	0.06278	0.0188	50
115	bepridil	0.24	4	0.604	0.06378	0.2722	75
116	docosahexaenoic acid ethyl ester	0.244	2	0.818	0.06676	0.0619	100
117	resveratrol	0.014	9	0.411	0.06788	0.4951	55
118	quinisocaine	0.188	4	0.598	0.06849	0.1123	75
119	nifuroxazide	0.23	4	0.598	0.06857	0.1579	75
120	piperacetazine	0.116	4	0.587	0.07766	0.1314	50
121	proguanil	-0.447	3	-0.656	0.08094	0.0519	66
122	phenazopyridine	0.104	4	0.582	0.08154	0.2078	50
123	methylbenzethonium chloride	0.183	6	0.483	0.0817	0.3613	66
124	5253409	0.201	2	0.797	0.08281	0.0872	50
125	pizotifen	0.154	4	0.575	0.08819	0.1735	50
126	ivermectin	0.232	5	0.52	0.0886	0.2903	60
127	alfadolone	-0.437	3	-0.639	0.09549	0.0845	66
128	lynestrenol	-0.167	5	-0.511	0.09629	0.0602	60
129	Prestwick-857	-0.208	4	-0.566	0.09883	0.2166	50
130	idazoxan	-0.231	4	-0.562	0.10247	0.125	50
131	mycophenolic acid	-0.422	3	-0.632	0.10278	0.2566	66
132	5211181	0.165	2	0.774	0.10285	0.1073	50
133	mometasone	0.169	4	0.559	0.10414	0.2974	50
134	depudecin	0.157	2	0.769	0.10742	0.075	50
135	hycanthone	0.167	4	0.55	0.11345	0.4197	50
136	epitiostanol	-0.326	4	-0.551	0.11629	0.1667	50
137	harmalol	0.145	3	0.618	0.1189	0.1079	66
138	foliosidine	0.11	6	0.453	0.11913	0.2109	50
139	benfluorex	0.147	4	0.544	0.12131	0.1279	50
140	desipramine	0.115	4	0.543	0.12238	0.3684	50
141	miconazole	0.138	5	0.486	0.13109	0.1967	60
142	dobutamine	-0.32	4	-0.538	0.13197	0.1159	50
143	Prestwick-689	-0.279	4	-0.532	0.13844	0.16	50
144	tamoxifen	0.119	7	0.408	0.14329	0.1613	57
145	primaquine	0.154	4	0.525	0.14607	0.2794	50
146	colchicine	0.115	6	0.436	0.14624	0.2471	50
147	bacitracin	-0.321	3	-0.594	0.14989	0.1152	66
148	fenbendazole	0.109	4	0.518	0.1556	0.2356	50
149	dinoprost	0.116	4	0.51	0.16575	0.3118	50
150	naftidrofuryl	0.1	4	0.51	0.16609	0.0943	50
151	suprofen	-0.238	4	-0.511	0.16867	0.2134	50
152	rofecoxib	0.076	6	0.423	0.17232	0.1387	50
153	PF-01378883-00	-0.227	4	-0.507	0.1744	0.0983	50
154	mianserin	0.15	5	0.458	0.17951	0.2611	60
155	monastrol	0.049	8	0.366	0.17976	0.2875	50
156	cloperastine	0.177	6	0.418	0.18174	0.5492	50
157	nortriptyline	0.1	4	0.5	0.1824	0.4343	50
158	phenylpropanolamine	0.158	4	0.496	0.18892	0.0946	50
159	profenamine	0.122	4	0.496	0.18974	0.1685	50
160	kaempferol	-0.356	4	-0.494	0.1964	0.2083	50
161	dimenhydrinate	0.088	4	0.488	0.20277	0.2659	50
162	hemicholinium	-0.218	4	-0.489	0.2049	0.2111	50
163	fluspirilene	0.211	4	0.483	0.21071	0.3869	50
164	naftifine	0.206	4	0.481	0.21532	0.239	50
165	chloropyrazine	-0.327	4	-0.482	0.21922	0.3377	50
166	propofol	0.197	4	0.477	0.22382	0.223	50
167	antimycin A	0.144	5	0.436	0.22501	0.4326	60
168	azacitidine	0.218	3	0.542	0.24063	0.6442	66
169	clomifene	0.188	4	0.469	0.24112	0.3793	50
170	clorgiline	0.187	4	0.468	0.24226	0.3636	50
171	noretynodrel	-0.232	4	-0.469	0.24675	0.2444	50
172	etacrynic acid	0.155	3	0.533	0.25889	0.3655	66
173	dequalinium chloride	0.182	4	0.46	0.26223	0.3913	50
174	8-azaguanine	0.185	4	0.454	0.27538	0.6686	50
175	oxaprozin	0.156	6	0.377	0.28082	0.3471	50
176	oxybutynin	0.114	4	0.451	0.28137	0.351	50
177	STOCK1N-35215	0.189	3	0.522	0.28409	0.3708	66
178	rilmenidine	-0.288	4	-0.452	0.28451	0.3699	50
179	sulconazole	0.173	4	0.449	0.28708	0.4938	50
180	raubasine	-0.296	4	-0.451	0.28901	0.218	50
181	abamectin	0.085	4	0.447	0.29338	0.3867	50
182	mebhydrolin	-0.3	4	-0.448	0.29479	0.3277	50
183	cisapride	0.105	4	0.446	0.29543	0.2182	50
184	epiandrosterone	-0.224	4	-0.447	0.29762	0.3955	50
185	butacaine	-0.225	4	-0.446	0.30007	0.3784	50
186	amoxapine	0.042	5	0.404	0.30013	0.3526	60
187	orciprenaline	-0.212	4	-0.446	0.30044	0.3071	50
188	CP-645525-01	0.145	3	0.513	0.30152	0.427	66
189	albendazole	0.164	3	0.513	0.30218	0.4186	66
190	bisoprolol	0.112	4	0.442	0.3055	0.1756	50
191	isotretinoin	-0.008	4	0.441	0.30828	0.4301	50
192	pilocarpine	-0.322	4	-0.443	0.30916	0.4575	50
193	hexestrol	0.158	4	0.44	0.31065	0.5657	50
194	corticosterone	-0.174	4	-0.441	0.3127	0.2627	50
195	iopamidol	-0.24	4	-0.437	0.32543	0.5556	50
196	semustine	0.113	4	0.434	0.327	0.548	50
197	antazoline	0.091	4	0.432	0.33343	0.3595	50
198	thiostrepton	0.158	4	0.427	0.34713	0.6471	50
199	Prestwick-642	-0.212	4	-0.427	0.35441	0.5655	50
200	thioguanosine	0.152	4	0.423	0.3574	0.7059	50
201	propranolol	-0.209	4	-0.425	0.35988	0.3944	50
202	ribavirin	-0.276	4	-0.423	0.36458	0.5461	50
203	gabexate	-0.192	4	-0.421	0.36903	0.539	50
204	enalapril	-0.235	4	-0.419	0.37498	0.2485	50
205	amantadine	-0.225	4	-0.417	0.37998	0.5621	50
206	Prestwick-559	0.137	3	0.48	0.3805	0.483	66
207	iopromide	-0.235	4	-0.416	0.38421	0.5074	50
208	W-13	0.077	2	0.552	0.40047	0.4969	50
209	norcyclobenzaprine	0.114	4	0.396	0.44353	0.6448	50
210	TTNPB	0.08	2	0.526	0.44877	0.6335	50
211	trimipramine	0.152	4	0.392	0.45455	0.5297	50
212	butoconazole	0.14	4	0.391	0.45945	0.5746	50
213	arachidonyltrifluoromethane	0.078	2	0.518	0.4638	0.6541	50
214	alimemazine	-0.04	4	0.389	0.46581	0.5273	50
215	probucol	0.096	6	0.318	0.47596	0.302	50
216	NU-1025	0.075	2	0.509	0.48097	0.4603	50
217	harmol	0.036	4	0.379	0.49619	0.5659	50
218	PHA-00767505E	0.001	4	0.379	0.49758	0.5355	50
219	mercaptopurine	0.098	2	0.495	0.51936	0.4759	50
220	AH-6809	-0.326	2	-0.486	0.55207	0.5978	50
221	scoulerine	0.107	4	0.361	0.56064	0.6114	50
222	Trolox C	0.112	4	0.358	0.57049	0.4553	50
223	5255229	0.196	2	0.478	0.58251	0.5368	50
224	Prestwick-675	0.11	4	0.353	0.5881	0.7119	50
225	lysergol	0.135	4	0.351	0.59583	0.6051	50
226	exisulind	-0.156	2	-0.468	0.61869	0.523	50
227	MK-886	-0.165	2	-0.466	0.62521	0.5629	50
228	staurosporine	0.098	4	0.339	0.63536	0.6385	50
229	imatinib	-0.261	2	-0.458	0.65494	0.6533	50
230	sulfinpyrazone	0.089	4	0.332	0.66027	0.6667	50
231	alclometasone	-0.013	4	0.329	0.67029	0.6329	50
232	sanguinarine	0.147	2	0.424	0.75764	0.9013	50
233	butein	-0.097	2	-0.416	0.78007	0.7943	50
234	Y-27632	0.129	2	0.396	0.82912	0.8139	50
235	celastrol	0.561	1	0.995	---	---	100
236	5109870	0.409	1	0.981	---	---	100
237	tyrphostin AG-1478	0.391	1	0.978	---	---	100
238	5114445	0.39	1	0.978	---	---	100
239	pararosaniline	0.385	1	0.976	---	---	100
240	MG-132	0.384	1	0.976	---	---	100
241	HC toxin	0.362	1	0.968	---	---	100
242	5140203	0.349	1	0.963	---	---	100
243	5213008	0.346	1	0.961	---	---	100
244	5151277	0.305	1	0.933	---	---	100
245	U0125	-0.405	1	-0.926	---	---	100
246	tioguanine	-0.391	1	-0.923	---	---	100
247	5286656	0.292	1	0.922	---	---	100
248	doxorubicin	-0.333	3	-0.908	---	---	33
249	H-7	0	4	-0.906	---	---	0
250	5162773	0.266	1	0.903	---	---	100
251	PHA-00665752	0.257	1	0.895	---	---	100
252	(-)-catechin	0.254	1	0.893	---	---	100
253	cytochalasin B	0.245	1	0.886	---	---	100
254	cantharidin	0.237	1	0.878	---	---	100
255	mitoxantrone	-0.213	3	-0.876	---	---	33
256	camptothecin	0	3	-0.87	---	---	0
257	alsterpaullone	-0.268	3	-0.868	---	---	33
258	2-deoxy-D-glucose	0.227	1	0.868	---	---	100
259	GW-8510	0	4	-0.86	---	---	0
260	chrysin	0	3	-0.846	---	---	0
261	oxamic acid	0.199	1	0.844	---	---	100
262	exemestane	0.194	1	0.841	---	---	100
263	HNMPA-(AM)3	0.183	1	0.834	---	---	100
264	oligomycin	0.178	1	0.83	---	---	100
265	3-aminobenzamide	0.17	1	0.827	---	---	100
266	5182598	0	2	-0.825	---	---	0
267	corynanthine	-0.166	3	-0.824	---	---	33
268	1,5-isoquinolinediol	0.147	1	0.816	---	---	100
269	dopamine	0.143	1	0.814	---	---	100
270	dimethyloxalylglycine	0.143	1	0.813	---	---	100
271	dexpropranolol	-0.189	3	-0.81	---	---	33
272	gefitinib	0.124	1	0.807	---	---	100
273	MS-275	0	2	0.796	---	---	0
274	BW-B70C	0	1	0.793	---	---	0
275	cyproterone	-0.121	4	-0.792	---	---	25
276	metamizole sodium	-0.118	6	-0.778	---	---	16
277	piperidolate	0	3	-0.777	---	---	0
278	methocarbamol	-0.205	3	-0.775	---	---	33
279	5152487	0	1	-0.775	---	---	0
280	Prestwick-1084	0	4	-0.772	---	---	0
281	scriptaid	0.098	3	0.766	---	---	33
282	pimethixene	0.059	3	0.765	---	---	33
283	decitabine	0	1	0.763	---	---	0
284	DL-thiorphan	0	2	-0.755	---	---	0
285	5186223	0	1	0.751	---	---	0
286	ioxaglic acid	-0.232	3	-0.751	---	---	33
287	lasalocid	0.059	4	0.747	---	---	25
288	ronidazole	0	3	-0.745	---	---	0
289	cefalonium	-0.189	3	-0.742	---	---	33
290	5186324	0	1	0.738	---	---	0
291	tiabendazole	0	4	-0.727	---	---	0
292	naringin	-0.182	4	-0.725	---	---	25
293	0175029-0000	0	6	-0.717	---	---	0
294	cetirizine	0	4	-0.717	---	---	0
295	sulfaphenazole	-0.157	4	-0.716	---	---	25
296	pyridoxine	-0.114	4	-0.716	---	---	25
297	Gly-His-Lys	0.081	3	0.712	---	---	33
298	estriol	0	4	-0.712	---	---	0
299	BAS-012416453	-0.213	3	-0.705	---	---	33
300	N-acetyl-L-leucine	0	4	-0.705	---	---	0
301	pyrithyldione	0.036	4	0.703	---	---	25
302	phthalylsulfathiazole	0	5	-0.701	---	---	0
303	podophyllotoxin	0.074	4	0.7	---	---	25
304	etamsylate	0	4	-0.697	---	---	0
305	tyloxapol	0	4	-0.695	---	---	0
306	levomepromazine	0	4	0.694	---	---	0
307	PF-00539745-00	0	3	0.692	---	---	0
308	ursodeoxycholic acid	0	3	-0.691	---	---	0
309	apomorphine	-0.194	5	-0.691	---	---	40
310	dimethadione	-0.181	4	-0.691	---	---	25
311	penbutolol	0	3	0.688	---	---	0
312	carbimazole	0.042	3	0.687	---	---	33
313	morantel	0	5	-0.686	---	---	0
314	ginkgolide A	0	4	-0.682	---	---	0
315	5149715	0	1	0.679	---	---	0
316	topiramate	0	1	0.679	---	---	0
317	scopoletin	0	2	-0.675	---	---	0
318	phenacetin	-0.133	4	-0.674	---	---	25
319	amoxicillin	-0.1	4	-0.67	---	---	25
320	alcuronium chloride	0	2	-0.67	---	---	0
321	hydrocortisone	0	3	-0.669	---	---	0
322	repaglinide	0	4	-0.669	---	---	0
323	aminophylline	-0.149	4	-0.667	---	---	25
324	ambroxol	0.029	4	0.665	---	---	25
325	isoflupredone	0	3	0.663	---	---	0
326	budesonide	-0.079	4	-0.661	---	---	25
327	ciclopirox	0.075	4	0.659	---	---	25
328	piribedil	-0.178	4	-0.657	---	---	25
329	co-dergocrine mesilate	0.063	4	0.654	---	---	25
330	cinoxacin	0	4	-0.654	---	---	0
331	rolitetracycline	0	4	-0.653	---	---	0
332	metacycline	0	4	-0.652	---	---	0
333	mepenzolate bromide	-0.069	5	-0.652	---	---	20
334	sitosterol	0	4	-0.651	---	---	0
335	tobramycin	0	4	-0.649	---	---	0
336	lorglumide	0	5	-0.648	---	---	0
337	denatonium benzoate	0	4	-0.647	---	---	0
338	clemizole	-0.068	5	-0.647	---	---	20
339	luteolin	0	4	-0.646	---	---	0
340	fenofibrate	0.082	3	0.646	---	---	33
341	chloramphenicol	0	4	-0.645	---	---	0
342	trioxysalen	0	4	-0.644	---	---	0
343	ethaverine	0	4	-0.643	---	---	0
344	propylthiouracil	0	4	-0.643	---	---	0
345	sulfametoxydiazine	0	4	-0.641	---	---	0
346	Prestwick-983	0.079	3	0.64	---	---	33
347	sulfadoxine	-0.17	3	-0.639	---	---	33
348	fosfosal	0	4	-0.637	---	---	0
349	meclofenamic acid	0.035	5	0.636	---	---	20
350	felbinac	0	4	0.634	---	---	0
351	Prestwick-691	0	3	0.631	---	---	0
352	canrenoic acid	0	4	-0.631	---	---	0
353	furaltadone	-0.11	6	-0.631	---	---	16
354	doxazosin	0	4	-0.629	---	---	0
355	hydralazine	-0.136	6	-0.629	---	---	33
356	milrinone	0	3	-0.628	---	---	0
357	oxprenolol	0	4	-0.628	---	---	0
358	adiphenine	0	5	0.628	---	---	0
359	medrysone	0	6	-0.627	---	---	0
360	2,6-dimethylpiperidine	-0.219	5	-0.627	---	---	40
361	cefamandole	0.067	4	0.621	---	---	25
362	monensin	0.045	6	0.621	---	---	16
363	seneciphylline	-0.131	4	-0.621	---	---	25
364	sulfamethoxazole	-0.221	5	-0.62	---	---	40
365	artemisinin	-0.134	3	-0.62	---	---	33
366	aminohippuric acid	0	4	-0.619	---	---	0
367	eticlopride	0.072	4	0.618	---	---	25
368	fisetin	0	1	-0.617	---	---	0
369	DL-PPMP	0	1	0.616	---	---	0
370	iohexol	0.043	4	0.616	---	---	25
371	pheneticillin	0.057	4	0.615	---	---	25
372	Prestwick-692	0	4	0.614	---	---	0
373	apramycin	0	4	-0.612	---	---	0
374	timolol	0	4	0.612	---	---	0
375	tridihexethyl	-0.171	4	-0.61	---	---	25
376	apigenin	0	4	-0.61	---	---	0
377	piracetam	-0.132	4	-0.61	---	---	25
378	Prestwick-1082	0	3	0.609	---	---	0
379	clofazimine	0.04	5	0.603	---	---	20
380	pipenzolate bromide	0	4	-0.602	---	---	0
381	ioversol	-0.129	4	-0.602	---	---	25
382	tetrandrine	0.053	4	0.601	---	---	25
383	Prestwick-664	0	6	-0.599	---	---	0
384	dioxybenzone	-0.119	4	-0.599	---	---	25
385	guaifenesin	-0.081	6	-0.597	---	---	16
386	STOCK1N-28457	-0.21	3	-0.597	---	---	33
387	proxyphylline	0	4	-0.597	---	---	0
388	merbromin	0	5	0.596	---	---	0
389	atovaquone	0	3	-0.595	---	---	0
390	biotin	-0.144	3	-0.593	---	---	33
391	cefixime	-0.164	4	-0.593	---	---	25
392	moxonidine	0	3	-0.59	---	---	0
393	nialamide	0	4	-0.59	---	---	0
394	cefoperazone	0	3	0.589	---	---	0
395	cyclopentolate	-0.178	4	-0.589	---	---	25
396	pyrazinamide	-0.13	4	-0.589	---	---	25
397	progesterone	-0.135	4	-0.587	---	---	25
398	demeclocycline	0	6	-0.587	---	---	0
399	sulmazole	0.059	3	0.587	---	---	33
400	lymecycline	-0.14	4	-0.586	---	---	25
401	AH-23848	0	3	-0.586	---	---	0
402	hexetidine	0.082	4	0.585	---	---	25
403	niridazole	0	4	-0.585	---	---	0
404	meticrane	0	5	-0.585	---	---	0
405	clemastine	0	3	0.583	---	---	0
406	natamycin	0	4	-0.583	---	---	0
407	benzathine benzylpenicillin	0	4	0.582	---	---	0
408	esculin	0	4	-0.582	---	---	0
409	ifosfamide	0.092	3	0.581	---	---	33
410	pivampicillin	-0.144	4	-0.579	---	---	25
411	dihydroergocristine	0.061	4	0.579	---	---	25
412	nipecotic acid	0	4	-0.578	---	---	0
413	pentoxyverine	-0.129	4	-0.578	---	---	25
414	alpha-yohimbine	0.083	3	0.578	---	---	33
415	skimmianine	0	4	-0.578	---	---	0
416	napelline	-0.13	4	-0.577	---	---	25
417	viomycin	0	4	0.576	---	---	0
418	thiamphenicol	0	5	0.576	---	---	0
419	(-)-atenolol	0	4	-0.574	---	---	0
420	capsaicin	0	4	-0.574	---	---	0
421	cefotiam	0	4	0.573	---	---	0
422	eucatropine	-0.108	6	-0.572	---	---	16
423	levcycloserine	0	4	-0.571	---	---	0
424	cefsulodin	-0.087	4	-0.571	---	---	25
425	flucytosine	-0.102	4	-0.57	---	---	25
426	mecamylamine	-0.193	3	-0.569	---	---	33
427	nitrofural	0	4	0.569	---	---	0
428	carbachol	0	4	-0.569	---	---	0
429	pronetalol	0	4	-0.568	---	---	0
430	hydroquinine	0.075	4	0.568	---	---	25
431	omeprazole	0	4	-0.567	---	---	0
432	cefapirin	-0.171	4	-0.566	---	---	25
433	11-deoxy-16,16-dimethylprostaglandin E2	-0.146	4	-0.566	---	---	25
434	zomepirac	0	4	-0.565	---	---	0
435	cyclobenzaprine	0	4	0.565	---	---	0
436	serotonin	-0.198	5	-0.564	---	---	40
437	demecolcine	0	1	0.563	---	---	0
438	anabasine	0	3	-0.563	---	---	0
439	benzthiazide	-0.114	4	-0.562	---	---	25
440	Prestwick-665	0	5	-0.562	---	---	0
441	chenodeoxycholic acid	0	4	0.562	---	---	0
442	tyrphostin AG-825	0	1	-0.562	---	---	0
443	talampicillin	0	4	-0.56	---	---	0
444	calcium pantothenate	-0.118	4	-0.56	---	---	25
445	dorzolamide	-0.094	4	-0.56	---	---	25
446	diperodon	0.083	3	0.559	---	---	33
447	canadine	0	4	0.558	---	---	0
448	bephenium hydroxynaphthoate	-0.109	5	-0.558	---	---	20
449	azaperone	0	4	-0.558	---	---	0
450	cefalexin	0	5	-0.558	---	---	0
451	simvastatin	0	4	-0.557	---	---	0
452	perphenazine	0.042	5	0.557	---	---	20
453	trihexyphenidyl	0	3	0.555	---	---	0
454	eldeline	0	6	-0.554	---	---	0
455	pancuronium bromide	0	4	-0.553	---	---	0
456	ketorolac	-0.184	4	-0.553	---	---	25
457	buflomedil	0	4	-0.552	---	---	0
458	desoxycortone	-0.113	4	-0.549	---	---	25
459	rimexolone	0	4	-0.549	---	---	0
460	gabapentin	-0.109	4	-0.549	---	---	25
461	iopanoic acid	-0.16	4	-0.549	---	---	25
462	6-azathymine	-0.146	4	-0.548	---	---	25
463	nadolol	0	4	0.548	---	---	0
464	torasemide	0	4	-0.548	---	---	0
465	12,13-EODE	0	1	0.548	---	---	0
466	demecarium bromide	0.062	4	0.547	---	---	25
467	flunixin	0	5	-0.547	---	---	0
468	oxybuprocaine	-0.172	4	-0.545	---	---	25
469	amitriptyline	0.09	6	0.545	---	---	33
470	nabumetone	-0.138	4	-0.544	---	---	25
471	colecalciferol	-0.163	4	-0.542	---	---	25
472	NS-398	0	3	-0.541	---	---	0
473	cefuroxime	-0.156	4	-0.541	---	---	25
474	etidronic acid	0	4	-0.54	---	---	0
475	clobetasol	-0.185	3	-0.54	---	---	33
476	meclofenoxate	0	6	-0.54	---	---	0
477	riboflavin	0	4	-0.539	---	---	0
478	sulpiride	-0.059	5	-0.539	---	---	20
479	ipratropium bromide	0	3	-0.538	---	---	0
480	canavanine	0	3	-0.538	---	---	0
481	delsoline	0.033	4	-0.538	---	---	0
482	ajmaline	0	3	0.538	---	---	0
483	nifurtimox	-0.156	4	-0.537	---	---	25
484	quinidine	0	3	-0.536	---	---	0
485	methacholine chloride	0	3	-0.536	---	---	0
486	gliclazide	0.038	4	-0.536	---	---	0
487	furazolidone	0.046	4	0.535	---	---	25
488	harmine	0	4	-0.535	---	---	0
489	bezafibrate	-0.123	4	-0.534	---	---	25
490	triflusal	0	3	-0.534	---	---	0
491	cyclopenthiazide	-0.162	4	-0.534	---	---	25
492	splitomicin	0	1	0.534	---	---	0
493	fluocinonide	0	5	-0.533	---	---	0
494	3-nitropropionic acid	0	4	-0.533	---	---	0
495	ketoconazole	0	4	-0.532	---	---	0
496	enilconazole	0	4	-0.532	---	---	0
497	Prestwick-972	-0.188	3	-0.532	---	---	33
498	sodium phenylbutyrate	0.057	7	0.531	---	---	42
499	trimethobenzamide	0	5	0.529	---	---	0
500	roxithromycin	0	4	-0.528	---	---	0
501	gallamine triethiodide	-0.101	5	-0.528	---	---	20
502	ketanserin	0.039	4	-0.528	---	---	0
503	difenidol	0	3	-0.527	---	---	0
504	5666823	0	1	0.524	---	---	0
505	quinpirole	0.07	4	0.523	---	---	25
506	dipivefrine	-0.116	4	-0.523	---	---	25
507	phenanthridinone	0	1	-0.523	---	---	0
508	cobalt chloride	0.061	3	0.523	---	---	33
509	verteporfin	0	3	-0.522	---	---	0
510	zoxazolamine	0	4	-0.52	---	---	0
511	tomelukast	0	1	0.52	---	---	0
512	3-acetylcoumarin	-0.111	5	-0.52	---	---	20
513	phenyl biguanide	0	1	0.52	---	---	0
514	tranexamic acid	0	5	0.518	---	---	0
515	norethisterone	-0.153	4	-0.518	---	---	25
516	bendroflumethiazide	-0.175	6	-0.518	---	---	33
517	atropine	0	4	-0.517	---	---	0
518	etamivan	0	4	-0.516	---	---	0
519	heliotrine	0	6	-0.516	---	---	0
520	gramine	-0.102	4	-0.516	---	---	25
521	amiprilose	-0.101	4	-0.516	---	---	25
522	fluvoxamine	-0.141	4	-0.516	---	---	25
523	ketotifen	0	4	0.515	---	---	0
524	raloxifene	0.101	7	0.515	---	---	42
525	alverine	0.067	4	0.515	---	---	25
526	ethotoin	-0.094	6	-0.515	---	---	16
527	cinchonine	0	4	0.514	---	---	0
528	7-aminocephalosporanic acid	-0.16	4	-0.514	---	---	25
529	idoxuridine	0.094	5	0.513	---	---	40
530	trimetazidine	0	4	-0.513	---	---	0
531	metitepine	-0.093	4	0.512	---	---	25
532	4,5-dianilinophthalimide	0	2	0.512	---	---	0
533	lisinopril	0	3	-0.511	---	---	0
534	ifenprodil	0	4	-0.511	---	---	0
535	copper sulfate	0	4	0.511	---	---	0
536	procaine	0	5	-0.511	---	---	0
537	sulindac sulfide	0	1	0.51	---	---	0
538	(+)-chelidonine	0.056	4	0.51	---	---	25
539	trazodone	0	3	-0.509	---	---	0
540	ornidazole	-0.081	5	-0.508	---	---	20
541	dexverapamil	0	1	-0.508	---	---	0
542	fusaric acid	0	4	-0.508	---	---	0
543	chlorphenesin	0	4	-0.507	---	---	0
544	papaverine	0	4	-0.506	---	---	0
545	quipazine	0.045	4	0.506	---	---	25
546	arachidonic acid	-0.128	3	-0.505	---	---	33
547	aminocaproic acid	0	3	-0.505	---	---	0
548	flunisolide	0.049	6	-0.505	---	---	0
549	pentoxifylline	0	5	0.505	---	---	0
550	captopril	-0.154	5	-0.504	---	---	40
551	adipiodone	-0.166	4	-0.504	---	---	25
552	vidarabine	-0.153	4	-0.504	---	---	25
553	N-phenylanthranilic acid	0	1	-0.503	---	---	0
554	hydroxyachillin	-0.141	4	-0.503	---	---	25
555	thiocolchicoside	0	4	-0.502	---	---	0
556	monocrotaline	0	4	-0.502	---	---	0
557	racecadotril	0	4	0.502	---	---	0
558	folic acid	0	4	0.501	---	---	0
559	ellipticine	0	4	-0.5	---	---	0
560	cloxacillin	0	4	0.5	---	---	0
561	levamisole	0	4	-0.5	---	---	0
562	tetracycline	0.05	5	0.499	---	---	20
563	clofibrate	0	2	-0.499	---	---	0
564	picotamide	0	5	-0.498	---	---	0
565	procyclidine	0	4	-0.496	---	---	0
566	solasodine	0.041	6	-0.496	---	---	0
567	ranitidine	0	5	-0.496	---	---	0
568	imipenem	0	4	-0.496	---	---	0
569	bumetanide	0.054	4	0.495	---	---	25
570	fenspiride	0	5	-0.495	---	---	0
571	fipexide	0	3	-0.493	---	---	0
572	metixene	0.067	4	0.493	---	---	25
573	Prestwick-685	0	5	-0.492	---	---	0
574	hexamethonium bromide	0	5	-0.492	---	---	0
575	tetraethylenepentamine	0	6	0.492	---	---	0
576	parbendazole	0	4	-0.491	---	---	0
577	cefotetan	0.074	3	0.491	---	---	33
578	betaxolol	0	4	-0.49	---	---	0
579	levodopa	-0.149	5	-0.49	---	---	20
580	oxolinic acid	-0.082	5	-0.489	---	---	20
581	neomycin	0	5	-0.489	---	---	0
582	tomatidine	-0.116	4	-0.489	---	---	25
583	alprostadil	-0.021	7	0.488	---	---	14
584	levobunolol	0	4	0.488	---	---	0
585	metaraminol	0	4	-0.487	---	---	0
586	tranylcypromine	0	5	-0.486	---	---	0
587	bupropion	0	4	-0.485	---	---	0
588	metoprolol	0	4	0.485	---	---	0
589	ozagrel	0	4	-0.485	---	---	0
590	benperidol	-0.093	4	-0.484	---	---	25
591	pyrantel	0.031	5	-0.483	---	---	0
592	benzamil	0.079	6	0.483	---	---	33
593	acetylsalicylsalicylic acid	0	4	-0.482	---	---	0
594	fasudil	0	2	0.482	---	---	0
595	loracarbef	-0.063	4	-0.482	---	---	25
596	naltrexone	-0.131	5	-0.481	---	---	20
597	diphenylpyraline	-0.04	6	0.481	---	---	16
598	amodiaquine	0.064	4	0.48	---	---	25
599	methyldopate	0	4	0.48	---	---	0
600	PF-00539758-00	0	3	0.48	---	---	0
601	indometacin	-0.044	8	-0.479	---	---	12
602	levothyroxine sodium	0.081	4	0.479	---	---	25
603	kanamycin	0	4	-0.479	---	---	0
604	indapamide	-0.125	6	-0.479	---	---	33
605	pirinixic acid	0	5	0.479	---	---	0
606	fenbufen	-0.068	6	-0.478	---	---	16
607	chloroquine	-0.149	4	-0.478	---	---	25
608	selegiline	0	4	-0.478	---	---	0
609	molsidomine	0	4	-0.478	---	---	0
610	proxymetacaine	-0.091	4	-0.478	---	---	25
611	guanethidine	0	3	-0.477	---	---	0
612	dyclonine	0.059	4	0.476	---	---	25
613	minaprine	0	5	-0.476	---	---	0
614	norfloxacin	0	5	-0.476	---	---	0
615	methoxsalen	0	3	-0.476	---	---	0
616	bicuculline	-0.102	4	-0.476	---	---	25
617	clidinium bromide	0	4	0.475	---	---	0
618	vinpocetine	0.03	4	-0.475	---	---	0
619	benfotiamine	0.072	5	-0.475	---	---	0
620	tolazamide	0	3	0.475	---	---	0
621	betamethasone	-0.142	3	-0.474	---	---	33
622	hesperetin	-0.2	5	-0.473	---	---	40
623	SC-58125	0	4	-0.473	---	---	0
624	saquinavir	0	4	-0.473	---	---	0
625	roxarsone	0.067	4	-0.473	---	---	0
626	Prestwick-920	-0.062	4	-0.471	---	---	25
627	iloprost	-0.149	3	-0.471	---	---	33
628	tetroquinone	0	4	-0.47	---	---	0
629	harpagoside	0.045	4	0.47	---	---	25
630	nafcillin	-0.125	4	-0.47	---	---	25
631	cycloserine	0.063	4	-0.469	---	---	0
632	glibenclamide	0	4	-0.469	---	---	0
633	0173570-0000	-0.204	6	-0.469	---	---	33
634	lovastatin	-0.089	4	0.469	---	---	0
635	suxibuzone	-0.145	4	-0.467	---	---	25
636	Prestwick-860	0.041	4	-0.466	---	---	0
637	nomifensine	0	5	-0.465	---	---	0
638	thiethylperazine	0	4	0.465	---	---	0
639	naringenin	-0.127	4	0.465	---	---	0
640	asiaticoside	0	4	-0.464	---	---	0
641	thiamine	-0.195	3	-0.464	---	---	33
642	acacetin	-0.106	6	-0.463	---	---	16
643	dirithromycin	0	3	-0.462	---	---	0
644	clindamycin	-0.231	5	-0.462	---	---	40
645	dihydroergotamine	0.04	5	0.462	---	---	20
646	caffeic acid	-0.154	3	-0.461	---	---	33
647	metanephrine	-0.106	5	-0.461	---	---	20
648	xamoterol	0	3	0.46	---	---	0
649	naloxone	0.021	6	-0.458	---	---	0
650	benzocaine	0	4	0.458	---	---	0
651	chlormezanone	0.035	4	0.458	---	---	25
652	protriptyline	0.057	4	0.457	---	---	25
653	corbadrine	0.05	4	-0.457	---	---	0
654	betulin	-0.19	3	-0.457	---	---	33
655	trichlormethiazide	0	4	-0.457	---	---	0
656	pramocaine	-0.105	5	-0.457	---	---	20
657	triamterene	0.113	5	0.457	---	---	40
658	hymecromone	-0.114	4	-0.456	---	---	25
659	mefexamide	-0.086	4	0.456	---	---	25
660	flutamide	-0.227	5	-0.455	---	---	40
661	carisoprodol	0	4	-0.454	---	---	0
662	fursultiamine	-0.13	4	-0.454	---	---	25
663	flurbiprofen	-0.099	5	-0.453	---	---	20
664	florfenicol	0	4	-0.452	---	---	0
665	etomidate	0.094	3	-0.451	---	---	0
666	pergolide	0.065	4	0.451	---	---	25
667	methoxamine	0	4	0.451	---	---	0
668	oxetacaine	-0.175	5	-0.45	---	---	40
669	cefalotin	0	4	-0.45	---	---	0
670	chlorzoxazone	0.031	4	-0.449	---	---	0
671	butyl hydroxybenzoate	-0.063	5	-0.449	---	---	20
672	myricetin	0	4	0.449	---	---	0
673	irinotecan	0	3	0.449	---	---	0
674	doxepin	0	3	0.448	---	---	0
675	zardaverine	0.06	4	0.448	---	---	25
676	hydroxyzine	-0.154	5	-0.448	---	---	20
677	atractyloside	-0.135	5	0.448	---	---	0
678	altretamine	0	4	-0.448	---	---	0
679	cromoglicic acid	0	2	0.448	---	---	0
680	leflunomide	0.065	4	0.447	---	---	25
681	levonorgestrel	-0.124	6	-0.447	---	---	16
682	sparteine	-0.151	4	-0.447	---	---	25
683	mephenytoin	-0.188	4	-0.447	---	---	25
684	sulfasalazine	0	5	-0.447	---	---	0
685	cinnarizine	0	4	0.447	---	---	0
686	buspirone	0	4	-0.446	---	---	0
687	erastin	0	4	0.446	---	---	0
688	sulfathiazole	0	5	-0.445	---	---	0
689	Prestwick-1085	0	4	-0.445	---	---	0
690	velnacrine	-0.17	4	-0.445	---	---	25
691	isocorydine	0	4	-0.445	---	---	0
692	PF-00875133-00	0	3	0.444	---	---	0
693	cinchonidine	0	4	0.443	---	---	0
694	cotinine	-0.038	6	-0.443	---	---	16
695	altizide	-0.119	4	-0.443	---	---	25
696	ceforanide	0	4	0.443	---	---	0
697	pempidine	0.035	5	-0.442	---	---	0
698	diflorasone	0	4	-0.442	---	---	0
699	metronidazole	-0.007	5	0.442	---	---	20
700	primidone	0	4	0.441	---	---	0
701	tacrolimus	-0.097	3	-0.441	---	---	33
702	chlorogenic acid	0	4	0.44	---	---	0
703	zalcitabine	0	4	0.44	---	---	0
704	methotrexate	-0.227	8	-0.44	---	---	37
705	fenoprofen	0	6	-0.439	---	---	0
706	benserazide	0	5	-0.439	---	---	0
707	guanfacine	0	5	-0.439	---	---	0
708	midodrine	-0.015	5	0.439	---	---	20
709	moxisylyte	-0.035	5	-0.438	---	---	20
710	octopamine	0	4	-0.438	---	---	0
711	F0447-0125	0.07	4	0.437	---	---	25
712	theophylline	0	4	-0.437	---	---	0
713	meprylcaine	-0.146	4	-0.436	---	---	25
714	ciprofloxacin	0.021	5	0.436	---	---	20
715	sulfamethoxypyridazine	0	5	-0.436	---	---	0
716	sotalol	0	4	-0.435	---	---	0
717	diphenhydramine	0	5	0.435	---	---	0
718	atropine methonitrate	0	3	-0.435	---	---	0
719	etodolac	-0.066	5	-0.434	---	---	20
720	citiolone	0.046	6	-0.434	---	---	0
721	alfuzosin	0	5	-0.434	---	---	0
722	benzonatate	-0.077	5	-0.433	---	---	20
723	tiapride	-0.067	5	-0.433	---	---	20
724	rotenone	0.056	4	0.433	---	---	25
725	domperidone	0.055	4	0.432	---	---	25
726	IC-86621	0.054	4	0.432	---	---	25
727	SR-95531	-0.157	4	-0.432	---	---	25
728	methanthelinium bromide	-0.144	4	-0.432	---	---	25
729	diloxanide	0	4	0.431	---	---	0
730	moracizine	0	4	-0.43	---	---	0
731	glycopyrronium bromide	0	5	-0.43	---	---	0
732	metampicillin	-0.063	5	0.429	---	---	0
733	alpha-estradiol	-0.013	16	-0.428	---	---	6
734	orlistat	0	5	-0.428	---	---	0
735	meglumine	-0.18	4	-0.427	---	---	25
736	etanidazole	0	4	-0.427	---	---	0
737	3-acetamidocoumarin	-0.106	4	0.427	---	---	0
738	ramipril	-0.157	4	-0.427	---	---	25
739	yohimbic acid	-0.115	3	0.427	---	---	33
740	SC-19220	0.077	4	0.427	---	---	25
741	metyrapone	0.063	4	-0.427	---	---	0
742	PHA-00745360	-0.065	8	0.426	---	---	0
743	levocabastine	0	4	-0.426	---	---	0
744	Prestwick-682	0.057	4	0.424	---	---	25
745	harman	0	4	-0.422	---	---	0
746	practolol	0	4	-0.422	---	---	0
747	pseudopelletierine	-0.09	4	-0.421	---	---	25
748	lidoflazine	0	3	0.421	---	---	0
749	adenosine phosphate	0.049	4	0.421	---	---	25
750	BCB000038	0	4	-0.42	---	---	0
751	kinetin	-0.149	4	-0.419	---	---	25
752	levopropoxyphene	0	4	0.419	---	---	0
753	isometheptene	-0.083	4	0.418	---	---	25
754	nimodipine	0	4	0.418	---	---	0
755	lomefloxacin	-0.055	6	-0.418	---	---	16
756	prilocaine	-0.082	6	-0.418	---	---	16
757	ganciclovir	0	4	-0.418	---	---	0
758	gentamicin	0	4	0.418	---	---	0
759	CAY-10397	0.076	3	0.416	---	---	33
760	valdecoxib	0	3	-0.416	---	---	0
761	flufenamic acid	-0.025	6	-0.416	---	---	16
762	Prestwick-674	0	6	-0.416	---	---	0
763	sulfanilamide	0	4	-0.416	---	---	0
764	butamben	0	4	0.415	---	---	0
765	promethazine	0.052	4	-0.415	---	---	0
766	6-benzylaminopurine	0	5	-0.414	---	---	0
767	bupivacaine	0	4	-0.412	---	---	0
768	fluorocurarine	0	4	-0.412	---	---	0
769	reserpine	0	3	-0.411	---	---	0
770	benzbromarone	-0.128	3	0.411	---	---	33
771	karakoline	0	6	0.411	---	---	0
772	amprolium	0	5	-0.41	---	---	0
773	16,16-dimethylprostaglandin E2	0	3	0.41	---	---	0
774	xylazine	0	4	-0.41	---	---	0
775	diltiazem	-0.064	5	-0.41	---	---	20
776	halcinonide	-0.092	5	-0.41	---	---	20
777	tropine	-0.113	4	-0.409	---	---	25
778	tetryzoline	0.079	3	0.409	---	---	33
779	5194442	0.056	4	0.408	---	---	25
780	flupentixol	0.064	4	0.408	---	---	25
781	cyclic adenosine monophosphate	-0.141	4	-0.408	---	---	25
782	piromidic acid	0.046	4	-0.407	---	---	0
783	azathioprine	-0.059	7	-0.407	---	---	14
784	calcium folinate	-0.097	5	0.407	---	---	0
785	pralidoxime	-0.141	4	-0.407	---	---	25
786	galantamine	0	4	-0.406	---	---	0
787	articaine	0	3	0.406	---	---	0
788	tubocurarine chloride	0	4	-0.406	---	---	0
789	phenindione	0.037	4	-0.405	---	---	0
790	16-phenyltetranorprostaglandin E2	-0.147	4	-0.404	---	---	25
791	indoprofen	-0.09	4	-0.404	---	---	25
792	aconitine	0	4	0.403	---	---	0
793	oxytetracycline	0	3	-0.402	---	---	0
794	rolipram	0.037	4	-0.402	---	---	0
795	sulfaguanidine	-0.033	5	-0.402	---	---	20
796	tiletamine	-0.135	4	-0.401	---	---	25
797	thioperamide	-0.071	5	0.401	---	---	0
798	alfaxalone	0	3	-0.401	---	---	0
799	CP-320650-01	-0.068	8	0.401	---	---	0
800	conessine	-0.098	4	-0.4	---	---	25
801	testosterone	0	5	0.4	---	---	0
802	dacarbazine	0	4	-0.4	---	---	0
803	salsolidin	0	4	-0.399	---	---	0
804	15(S)-15-methylprostaglandin E2	0	4	0.399	---	---	0
805	propidium iodide	0	4	0.399	---	---	0
806	mestranol	0.078	4	0.399	---	---	25
807	Prestwick-967	0	4	-0.398	---	---	0
808	phenazone	-0.174	3	-0.398	---	---	33
809	aminophenazone	0.055	5	-0.397	---	---	0
810	riluzole	-0.042	5	-0.397	---	---	20
811	metformin	0.032	10	0.396	---	---	20
812	arcaine	0.063	4	0.396	---	---	25
813	benzydamine	-0.137	4	-0.396	---	---	25
814	halofantrine	-0.211	3	-0.395	---	---	33
815	butirosin	0	4	-0.395	---	---	0
816	lansoprazole	-0.155	4	-0.395	---	---	25
817	ikarugamycin	-0.264	3	0.395	---	---	0
818	acemetacin	0	4	0.395	---	---	0
819	bacampicillin	0.053	4	0.395	---	---	25
820	bromopride	0.035	6	-0.395	---	---	0
821	pipemidic acid	0	3	-0.395	---	---	0
822	pentetic acid	0	5	-0.395	---	---	0
823	spaglumic acid	0	2	-0.394	---	---	0
824	2-aminobenzenesulfonamide	0	4	0.394	---	---	0
825	beclometasone	0	3	0.394	---	---	0
826	trimethadione	0	4	-0.394	---	---	0
827	betonicine	0.037	6	0.393	---	---	16
828	bufexamac	0.069	4	0.393	---	---	25
829	cefepime	-0.088	4	-0.393	---	---	25
830	Prestwick-981	-0.198	3	-0.392	---	---	33
831	adrenosterone	-0.094	4	-0.391	---	---	25
832	famprofazone	0	6	-0.391	---	---	0
833	paclitaxel	-0.149	6	-0.391	---	---	33
834	AG-013608	0.024	8	0.39	---	---	12
835	metolazone	-0.147	5	-0.39	---	---	20
836	isoxsuprine	-0.228	5	-0.389	---	---	40
837	piretanide	-0.152	4	-0.389	---	---	25
838	diprophylline	-0.026	5	0.389	---	---	40
839	ethionamide	0	3	0.389	---	---	0
840	6-bromoindirubin-3'-oxime	0	7	-0.389	---	---	0
841	Prestwick-1100	0	4	0.388	---	---	0
842	Prestwick-1103	-0.121	4	0.388	---	---	0
843	oxymetazoline	0.031	4	0.387	---	---	25
844	netilmicin	0	4	-0.387	---	---	0
845	griseofulvin	-0.073	5	-0.387	---	---	20
846	fluvastatin	0	4	-0.387	---	---	0
847	droperidol	0.057	4	-0.387	---	---	0
848	nicotinic acid	0	4	-0.387	---	---	0
849	epirizole	0	5	-0.386	---	---	0
850	finasteride	-0.089	6	0.385	---	---	0
851	flumequine	0.061	4	0.385	---	---	25
852	AG-012559	0	3	-0.385	---	---	0
853	PHA-00846566E	0.105	3	0.385	---	---	33
854	midecamycin	0	5	-0.384	---	---	0
855	cinchocaine	-0.093	5	-0.384	---	---	20
856	minocycline	0.053	5	0.383	---	---	20
857	niflumic acid	-0.158	4	-0.382	---	---	25
858	SC-560	-0.184	3	-0.382	---	---	33
859	flumetasone	0	6	-0.382	---	---	0
860	tiratricol	0.002	4	-0.381	---	---	25
861	fludroxycortide	0	5	-0.381	---	---	0
862	coralyne	0	4	0.381	---	---	0
863	todralazine	-0.078	5	-0.381	---	---	20
864	xylometazoline	0	4	-0.38	---	---	0
865	allantoin	0	5	-0.38	---	---	0
866	CP-319743	0	4	0.379	---	---	0
867	loxapine	0.048	4	0.378	---	---	25
868	chlorhexidine	0.018	5	0.377	---	---	20
869	tocainide	0	4	0.377	---	---	0
870	probenecid	-0.058	4	-0.377	---	---	25
871	harmaline	-0.135	4	-0.376	---	---	25
872	tenoxicam	0	4	0.376	---	---	0
873	urapidil	0.05	4	-0.376	---	---	0
874	sulfaquinoxaline	-0.195	3	-0.376	---	---	33
875	erythromycin	-0.103	5	-0.375	---	---	20
876	cytisine	-0.16	4	-0.375	---	---	25
877	guanabenz	-0.254	5	-0.374	---	---	40
878	crotamiton	0	4	-0.374	---	---	0
879	ciclosporin	0.027	6	0.373	---	---	16
880	moroxydine	0	5	-0.372	---	---	0
881	methylprednisolone	0.034	4	-0.372	---	---	0
882	dantrolene	0	6	0.371	---	---	0
883	triamcinolone	0.05	5	0.371	---	---	20
884	benzylpenicillin	0	4	-0.371	---	---	0
885	protoveratrine A	0.048	4	-0.37	---	---	0
886	flavoxate	0	4	-0.369	---	---	0
887	ceftazidime	0	3	-0.369	---	---	0
888	isoconazole	0.072	5	0.369	---	---	40
889	colforsin	-0.172	5	-0.369	---	---	40
890	proglumide	-0.012	5	-0.369	---	---	20
891	pyrimethamine	-0.08	5	-0.368	---	---	20
892	dizocilpine	0	5	0.368	---	---	0
893	praziquantel	-0.08	4	-0.368	---	---	25
894	ampyrone	0	5	0.368	---	---	0
895	nitrofurantoin	0.046	5	0.368	---	---	20
896	pinacidil	-0.168	4	-0.367	---	---	25
897	rescinnamine	0.093	3	0.367	---	---	33
898	carbenoxolone	-0.146	4	-0.367	---	---	25
899	nifenazone	0	5	-0.367	---	---	0
900	chlorambucil	-0.081	4	-0.366	---	---	25
901	meptazinol	-0.101	4	-0.366	---	---	25
902	meteneprost	0	4	0.366	---	---	0
903	remoxipride	0.054	4	-0.365	---	---	0
904	meropenem	0.068	4	-0.365	---	---	0
905	tetrahydroalstonine	0	4	0.365	---	---	0
906	scopolamine N-oxide	0	5	-0.364	---	---	0
907	debrisoquine	0	4	0.364	---	---	0
908	edrophonium chloride	-0.111	5	-0.364	---	---	20
909	isoetarine	0.055	4	-0.363	---	---	0
910	alprenolol	-0.174	4	-0.363	---	---	25
911	Prestwick-1080	0	4	-0.363	---	---	0
912	scopolamine	0	4	-0.362	---	---	0
913	amylocaine	0	5	0.361	---	---	0
914	dapsone	0	5	0.361	---	---	0
915	pentamidine	0	5	-0.361	---	---	0
916	dienestrol	-0.02	3	0.361	---	---	33
917	CP-690334-01	0.086	8	0.361	---	---	37
918	0225151-0000	0	3	-0.361	---	---	0
919	carcinine	0.039	4	-0.361	---	---	0
920	meclocycline	-0.165	4	-0.36	---	---	25
921	chlortetracycline	0.022	5	0.359	---	---	20
922	cefaclor	0	4	0.359	---	---	0
923	fusidic acid	0	4	-0.359	---	---	0
924	citalopram	0.052	4	0.359	---	---	25
925	vitexin	0	4	-0.359	---	---	0
926	ursolic acid	0.07	4	0.359	---	---	25
927	vinblastine	-0.183	3	-0.358	---	---	33
928	carbinoxamine	0	4	-0.358	---	---	0
929	lobelanidine	-0.171	4	-0.357	---	---	25
930	dexpanthenol	0	4	-0.357	---	---	0
931	liothyronine	-0.088	4	-0.357	---	---	25
932	nystatin	0	3	-0.357	---	---	0
933	4-hydroxyphenazone	0.038	5	0.356	---	---	20
934	ofloxacin	0	5	-0.356	---	---	0
935	ampicillin	-0.141	4	-0.356	---	---	25
936	ethisterone	-0.134	6	-0.356	---	---	33
937	aciclovir	-0.089	6	0.355	---	---	0
938	theobromine	-0.042	4	-0.355	---	---	25
939	vancomycin	-0.112	4	0.355	---	---	0
940	sulfadiazine	0	5	-0.355	---	---	0
941	quinethazone	0.055	4	-0.355	---	---	0
942	paracetamol	0.055	4	-0.354	---	---	0
943	ramifenazone	0	4	-0.354	---	---	0
944	ciprofibrate	0	4	-0.354	---	---	0
945	flunarizine	0.068	4	0.353	---	---	25
946	zaprinast	0	4	-0.353	---	---	0
947	tinidazole	0	6	-0.353	---	---	0
948	disopyramide	0	4	0.353	---	---	0
949	carmustine	0	3	-0.353	---	---	0
950	CP-944629	0	4	-0.353	---	---	0
951	spironolactone	0	5	-0.351	---	---	0
952	biperiden	-0.135	5	0.351	---	---	0
953	(-)-isoprenaline	0.065	4	0.35	---	---	25
954	N-acetylmuramic acid	-0.125	4	-0.35	---	---	25
955	Prestwick-1083	0	3	-0.35	---	---	0
956	deferoxamine	-0.115	8	-0.349	---	---	25
957	sulfamerazine	-0.048	5	-0.348	---	---	20
958	melatonin	-0.125	4	-0.348	---	---	25
959	methylergometrine	0.064	4	-0.348	---	---	0
960	piroxicam	0.098	4	-0.348	---	---	0
961	diflunisal	-0.07	5	-0.348	---	---	20
962	tropicamide	-0.07	6	-0.347	---	---	16
963	cefazolin	0	5	-0.346	---	---	0
964	mexiletine	0.052	6	0.346	---	---	33
965	verapamil	0	6	0.346	---	---	0
966	hecogenin	-0.086	4	-0.346	---	---	25
967	naproxen	0.017	9	0.346	---	---	11
968	molindone	0	4	-0.345	---	---	0
969	khellin	0	5	0.345	---	---	0
970	vigabatrin	-0.161	3	0.345	---	---	0
971	furosemide	0	4	-0.345	---	---	0
972	mimosine	0	3	-0.344	---	---	0
973	trimethoprim	-0.086	5	-0.344	---	---	20
974	azapropazone	-0.147	3	-0.344	---	---	33
975	flucloxacillin	0.056	4	0.344	---	---	25
976	ritodrine	-0.141	4	-0.343	---	---	25
977	PHA-00851261E	-0.063	8	-0.343	---	---	12
978	dextromethorphan	0.055	4	-0.343	---	---	0
979	metoclopramide	0	6	-0.341	---	---	0
980	laudanosine	0	4	-0.341	---	---	0
981	gliquidone	0	4	-0.34	---	---	0
982	glimepiride	0	4	-0.34	---	---	0
983	piperacillin	0	5	-0.34	---	---	0
984	trapidil	-0.145	3	-0.339	---	---	33
985	enoxacin	0.053	4	-0.339	---	---	0
986	ethambutol	0	5	-0.338	---	---	0
987	meclozine	0.138	5	0.338	---	---	40
988	hydrocotarnine	0.051	4	-0.338	---	---	0
989	aztreonam	-0.197	5	-0.338	---	---	40
990	ticlopidine	0.075	5	0.337	---	---	40
991	ribostamycin	0	4	-0.337	---	---	0
992	lithocholic acid	0.078	6	0.337	---	---	33
993	prasterone	0.08	4	0.337	---	---	25
994	dl-alpha tocopherol	0	4	-0.336	---	---	0
995	fenoterol	0.078	3	-0.336	---	---	0
996	dexibuprofen	-0.128	4	-0.335	---	---	25
997	tracazolate	0.098	4	-0.335	---	---	0
998	diclofenamide	0	4	-0.335	---	---	0
999	physostigmine	0	4	-0.334	---	---	0
1000	isoxicam	-0.045	5	0.334	---	---	20
1001	sulfadimethoxine	-0.255	5	-0.334	---	---	40
1002	hydroflumethiazide	0	5	0.333	---	---	0
1003	prednisone	-0.213	5	-0.333	---	---	40
1004	cyanocobalamin	0	4	-0.333	---	---	0
1005	nalidixic acid	0	5	-0.333	---	---	0
1006	josamycin	-0.197	5	-0.333	---	---	40
1007	procainamide	0	4	-0.333	---	---	0
1008	diphemanil metilsulfate	-0.052	5	-0.332	---	---	20
1009	hydrochlorothiazide	0	5	-0.331	---	---	0
1010	mephenesin	-0.055	5	-0.331	---	---	20
1011	nimesulide	0.057	4	0.331	---	---	25
1012	CP-863187	0	4	0.331	---	---	0
1013	dinoprostone	-0.133	4	-0.331	---	---	25
1014	sulfadimidine	-0.029	6	-0.33	---	---	16
1015	kawain	0	5	-0.33	---	---	0
1016	methazolamide	0.053	4	0.33	---	---	25
1017	thioproperazine	-0.08	5	0.329	---	---	0
1018	lisuride	-0.115	5	0.329	---	---	0
1019	hydrastinine	-0.12	5	-0.328	---	---	20
1020	rifampicin	-0.094	4	-0.328	---	---	25
1021	atracurium besilate	-0.198	3	0.328	---	---	0
1022	mesalazine	0	5	-0.327	---	---	0
1023	tetracaine	-0.196	3	-0.327	---	---	33
1024	PNU-0293363	-0.219	3	-0.327	---	---	33
1025	10-methoxyharmalan	0	4	-0.327	---	---	0
1026	pentolonium	0	5	-0.327	---	---	0
1027	H-89	0	3	-0.326	---	---	0
1028	terazosin	-0.082	4	0.326	---	---	25
1029	ticarcillin	-0.177	3	-0.326	---	---	33
1030	esculetin	-0.221	3	-0.325	---	---	33
1031	L-methionine sulfoximine	0.044	4	0.325	---	---	25
1032	aminoglutethimide	0	3	-0.325	---	---	0
1033	nomegestrol	0	3	0.325	---	---	0
1034	BCB000039	0	3	0.325	---	---	0
1035	prazosin	0.093	6	0.325	---	---	33
1036	clebopride	-0.147	4	-0.324	---	---	25
1037	deptropine	0.08	4	0.324	---	---	25
1038	sertaconazole	-0.018	4	-0.324	---	---	25
1039	lomustine	0.072	4	0.324	---	---	25
1040	azlocillin	-0.09	4	-0.324	---	---	25
1041	carbarsone	0	4	-0.323	---	---	0
1042	lobeline	0.031	4	0.323	---	---	25
1043	palmatine	0	4	-0.322	---	---	0
1044	tolfenamic acid	0.031	4	-0.322	---	---	0
1045	sulfamonomethoxine	-0.158	4	0.322	---	---	0
1046	diethylstilbestrol	-0.036	6	0.321	---	---	16
1047	isosorbide	0	4	0.321	---	---	0
1048	tolmetin	0	4	-0.321	---	---	0
1049	S-propranolol	0.047	4	0.321	---	---	25
1050	acenocoumarol	0	5	0.321	---	---	0
1051	tolnaftate	-0.149	5	-0.32	---	---	40
1052	iocetamic acid	0	4	0.32	---	---	0
1053	PHA-00816795	0	2	-0.32	---	---	0
1054	Chicago Sky Blue 6B	-0.145	4	-0.32	---	---	25
1055	drofenine	0.086	4	0.32	---	---	25
1056	etilefrine	-0.144	4	-0.32	---	---	25
1057	pindolol	-0.097	5	0.319	---	---	0
1058	fluoxetine	-0.114	4	0.319	---	---	0
1059	ebselen	0.078	3	0.319	---	---	33
1060	lumicolchicine	0	3	-0.319	---	---	0
1061	betulinic acid	0	4	0.319	---	---	0
1062	boldine	0.059	4	0.317	---	---	25
1063	sulfacetamide	-0.096	4	-0.317	---	---	25
1064	gelsemine	0	4	-0.317	---	---	0
1065	nadide	0	4	-0.317	---	---	0
1066	equilin	0	5	0.316	---	---	0
1067	nefopam	-0.189	5	-0.316	---	---	40
1068	N-acetyl-L-aspartic acid	0	4	-0.316	---	---	0
1069	santonin	0	4	-0.316	---	---	0
1070	N6-methyladenosine	-0.125	4	-0.316	---	---	25
1071	telenzepine	0	4	-0.315	---	---	0
1072	zimeldine	0.027	5	-0.315	---	---	0
1073	procarbazine	0	3	0.315	---	---	0
1074	C-75	0	4	0.314	---	---	0
1075	dosulepin	-0.094	4	0.314	---	---	25
1076	hydrastine hydrochloride	0.028	4	-0.314	---	---	0
1077	isopropamide iodide	0.076	4	0.313	---	---	25
1078	ketoprofen	-0.025	6	-0.313	---	---	16
1079	bethanechol	0	4	-0.312	---	---	0
1080	SB-202190	0	5	-0.312	---	---	0
1081	0316684-0000	-0.154	4	-0.312	---	---	25
1082	bretylium tosilate	-0.134	4	-0.312	---	---	25
1083	etiocholanolone	-0.176	6	0.311	---	---	0
1084	estropipate	-0.144	4	-0.311	---	---	25
1085	clopamide	0	4	-0.309	---	---	0
1086	iproniazid	-0.123	5	0.308	---	---	0
1087	nilutamide	0	4	-0.308	---	---	0
1088	terbutaline	0.048	4	0.308	---	---	25
1089	troleandomycin	0.027	4	-0.307	---	---	0
1090	clozapine	0.073	17	0.307	---	---	29
1091	streptomycin	-0.156	4	-0.306	---	---	25
1092	nitrendipine	0	5	-0.306	---	---	0
1093	etofenamate	0	4	-0.306	---	---	0
1094	iobenguane	0.037	4	0.306	---	---	25
1095	fludrocortisone	-0.199	8	-0.306	---	---	37
1096	cefoxitin	0.037	4	0.305	---	---	25
1097	etynodiol	-0.181	4	-0.305	---	---	25
1098	chlorpropamide	0.033	6	-0.305	---	---	0
1099	metrifonate	0.094	5	0.305	---	---	40
1100	acetazolamide	0.048	4	-0.305	---	---	0
1101	R-atenolol	0	4	-0.304	---	---	0
1102	mephentermine	0.043	5	-0.304	---	---	0
1103	AG-028671	-0.101	3	-0.304	---	---	33
1104	mafenide	-0.105	5	-0.304	---	---	20
1105	sulfamethizole	0.055	4	0.304	---	---	25
1106	picrotoxinin	0	4	-0.303	---	---	0
1107	nizatidine	0	4	-0.303	---	---	0
1108	3-hydroxy-DL-kynurenine	0.041	6	0.303	---	---	16
1109	lincomycin	-0.044	3	0.303	---	---	33
1110	colistin	-0.149	4	0.302	---	---	0
1111	monobenzone	0.052	4	0.302	---	---	25
1112	pivmecillinam	0	4	-0.302	---	---	0
1113	celecoxib	-0.05	5	0.302	---	---	0
1114	carteolol	-0.135	4	0.301	---	---	0
1115	etofylline	0.038	5	-0.301	---	---	0
1116	carbamazepine	0.1	8	0.3	---	---	25
1117	cortisone	0.041	3	0.299	---	---	33
1118	pepstatin	0	4	0.298	---	---	0
1119	zidovudine	-0.122	4	-0.297	---	---	25
1120	terguride	0.028	8	-0.297	---	---	0
1121	cimetidine	0	5	-0.296	---	---	0
1122	arecoline	-0.173	4	-0.296	---	---	25
1123	oxybenzone	-0.077	4	0.296	---	---	25
1124	guanadrel	-0.144	5	-0.294	---	---	20
1125	dipyridamole	0.072	6	0.293	---	---	33
1126	atropine oxide	-0.021	5	-0.292	---	---	20
1127	calycanthine	0	4	-0.292	---	---	0
1128	imidurea	0.077	3	-0.292	---	---	0
1129	zuclopenthixol	0	4	0.292	---	---	0
1130	betahistine	0.05	4	-0.291	---	---	0
1131	glipizide	0	5	-0.29	---	---	0
1132	methyldopa	0	5	-0.29	---	---	0
1133	lidocaine	0	5	-0.29	---	---	0
1134	clorsulon	-0.175	4	0.289	---	---	0
1135	acebutolol	0	5	-0.289	---	---	0
1136	noscapine	0	4	-0.288	---	---	0
1137	ionomycin	0.112	3	0.288	---	---	33
1138	prednicarbate	-0.178	3	-0.288	---	---	33
1139	lactobionic acid	0	4	-0.287	---	---	0
1140	pirlindole	-0.121	3	-0.286	---	---	33
1141	tiaprofenic acid	-0.108	4	-0.286	---	---	25
1142	methapyrilene	0.029	4	-0.286	---	---	0
1143	oleandomycin	-0.057	5	-0.286	---	---	20
1144	oxedrine	0.036	4	-0.285	---	---	0
1145	terconazole	0	4	-0.284	---	---	0
1146	tacrine	0	4	0.283	---	---	0
1147	prednisolone	0.033	5	0.283	---	---	20
1148	tetramisole	0.073	4	-0.281	---	---	0
1149	paroxetine	0	4	-0.281	---	---	0
1150	vinburnine	-0.132	4	0.281	---	---	25
1151	risperidone	0	3	-0.281	---	---	0
1152	myosmine	-0.065	6	-0.28	---	---	16
1153	nisoxetine	0.047	4	-0.28	---	---	0
1154	latamoxef	0.048	3	0.278	---	---	33
1155	diclofenac	-0.013	5	-0.276	---	---	20
1156	convolamine	0	4	0.276	---	---	0
1157	ciclacillin	0	4	-0.276	---	---	0
1158	Prestwick-864	0	4	-0.276	---	---	0
1159	diethylcarbamazine	0	4	-0.276	---	---	0
1160	hyoscyamine	0.046	5	-0.275	---	---	0
1161	vincamine	-0.124	6	0.275	---	---	16
1162	bergenin	-0.115	4	-0.275	---	---	25
1163	SB-203580	0	5	0.275	---	---	0
1164	bambuterol	-0.145	4	-0.275	---	---	25
1165	quercetin	-0.03	6	0.275	---	---	33
1166	cefotaxime	-0.085	5	0.274	---	---	20
1167	bucladesine	-0.04	6	-0.273	---	---	16
1168	bromocriptine	0.097	5	0.273	---	---	40
1169	tremorine	0.046	4	-0.273	---	---	0
1170	phentolamine	0	7	-0.272	---	---	0
1171	pirenperone	-0.116	5	-0.271	---	---	20
1172	dropropizine	-0.088	4	-0.271	---	---	25
1173	5279552	0	2	-0.271	---	---	0
1174	heptaminol	-0.094	5	0.27	---	---	0
1175	haloperidol	0.031	32	0.269	---	---	12
1176	succinylsulfathiazole	-0.11	4	-0.269	---	---	25
1177	SR-95639A	0.07	4	0.268	---	---	25
1178	stachydrine	0	4	-0.268	---	---	0
1179	danazol	-0.039	4	0.268	---	---	25
1180	acetylsalicylic acid	0.037	13	-0.267	---	---	0
1181	doxylamine	-0.069	5	-0.267	---	---	20
1182	Prestwick-984	0	4	-0.267	---	---	0
1183	brompheniramine	0	4	-0.265	---	---	0
1184	pirenzepine	0.071	5	0.265	---	---	40
1185	streptozocin	-0.16	4	-0.264	---	---	25
1186	epivincamine	0.056	4	0.264	---	---	25
1187	spiramycin	0.023	6	-0.264	---	---	0
1188	orphenadrine	0.003	6	0.263	---	---	33
1189	LM-1685	-0.051	3	-0.262	---	---	33
1190	BCB000040	-0.131	4	-0.262	---	---	25
1191	oxolamine	-0.024	4	-0.261	---	---	25
1192	isoniazid	-0.081	5	-0.261	---	---	20
1193	(-)-MK-801	0.052	4	-0.261	---	---	0
1194	berberine	0.069	4	-0.26	---	---	0
1195	triprolidine	0.068	4	0.26	---	---	25
1196	dilazep	0.054	5	-0.259	---	---	0
1197	propantheline bromide	0.036	4	0.259	---	---	25
1198	trifluridine	-0.111	4	0.258	---	---	25
1199	androsterone	0.046	4	0.257	---	---	25
1200	troglitazone	-0.025	16	0.257	---	---	18
1201	aceclofenac	-0.119	4	0.257	---	---	25
1202	neostigmine bromide	0	4	-0.257	---	---	0
1203	dexamethasone	-0.022	8	0.256	---	---	25
1204	pheniramine	-0.042	5	0.255	---	---	20
1205	cefmetazole	0.067	4	0.254	---	---	25
1206	novobiocin	0.008	9	0.254	---	---	22
1207	mefenamic acid	0	5	-0.254	---	---	0
1208	yohimbine	0	5	-0.253	---	---	0
1209	fluticasone	-0.13	4	-0.253	---	---	25
1210	pargyline	0.055	4	-0.252	---	---	0
1211	acepromazine	0.059	4	-0.252	---	---	0
1212	famotidine	-0.075	5	-0.252	---	---	20
1213	spiradoline	0.052	4	0.251	---	---	25
1214	(+)-isoprenaline	0.059	4	0.251	---	---	25
1215	ascorbic acid	0.05	4	0.251	---	---	25
1216	estrone	0.043	4	-0.251	---	---	0
1217	brinzolamide	0	4	-0.251	---	---	0
1218	rosiglitazone	-0.091	14	-0.251	---	---	21
1219	thiamazole	0	6	0.25	---	---	0
1220	nifedipine	0.02	7	-0.25	---	---	0
1221	iodixanol	0	3	0.248	---	---	0
1222	chlortalidone	-0.155	4	-0.248	---	---	25
1223	decamethonium bromide	0	4	-0.248	---	---	0
1224	trimethylcolchicinic acid	0	4	-0.247	---	---	0
1225	sulindac	-0.066	7	-0.247	---	---	14
1226	sulfafurazole	0.026	5	-0.247	---	---	0
1227	bemegride	0	4	-0.246	---	---	0
1228	phenformin	0.04	7	0.246	---	---	28
1229	bromperidol	0.093	3	0.245	---	---	33
1230	mevalolactone	0.086	3	0.245	---	---	33
1231	triflupromazine	-0.095	4	0.245	---	---	0
1232	sulfabenzamide	0.047	4	0.244	---	---	25
1233	sulfapyridine	-0.121	4	-0.244	---	---	25
1234	ethosuximide	0.063	4	0.244	---	---	25
1235	ergocalciferol	0.064	4	0.244	---	---	25
1236	propafenone	0.056	4	-0.244	---	---	0
1237	letrozole	0	4	-0.243	---	---	0
1238	dicloxacillin	0	4	-0.243	---	---	0
1239	suramin sodium	-0.157	4	-0.241	---	---	25
1240	mepyramine	0.07	4	0.241	---	---	25
1241	naftopidil	0.09	3	0.24	---	---	33
1242	nalbuphine	0.048	5	0.239	---	---	20
1243	0317956-0000	-0.007	8	0.238	---	---	25
1244	amiloride	0.072	5	-0.238	---	---	0
1245	piperine	0.07	4	0.238	---	---	25
1246	solanine	0	4	-0.238	---	---	0
1247	fluorometholone	0.073	4	0.237	---	---	25
1248	tolbutamide	0.032	7	-0.234	---	---	0
1249	dehydrocholic acid	-0.049	5	-0.234	---	---	20
1250	sulfachlorpyridazine	0.035	5	-0.233	---	---	0
1251	amiodarone	0.059	5	0.233	---	---	20
1252	retrorsine	0.044	4	0.232	---	---	25
1253	betazole	0.046	5	0.232	---	---	20
1254	promazine	0.042	6	-0.232	---	---	0
1255	oxantel	0.052	4	0.232	---	---	25
1256	sisomicin	0.048	4	0.231	---	---	25
1257	minoxidil	-0.1	5	-0.23	---	---	20
1258	memantine	0	4	-0.23	---	---	0
1259	mifepristone	0.073	4	-0.229	---	---	0
1260	baclofen	0.027	5	0.228	---	---	20
1261	naphazoline	0.026	5	0.228	---	---	20
1262	imipramine	0	4	0.226	---	---	0
1263	tolazoline	-0.075	5	-0.226	---	---	20
1264	acetohexamide	0	4	-0.223	---	---	0
1265	labetalol	0.054	4	0.222	---	---	25
1266	megestrol	-0.087	4	-0.22	---	---	25
1267	mebeverine	-0.117	4	-0.22	---	---	25
1268	isradipine	0.073	4	0.219	---	---	25
1269	isocarboxazid	-0.089	5	0.219	---	---	20
1270	chlorphenamine	0.064	4	-0.219	---	---	0
1271	nicergoline	0.053	5	0.219	---	---	20
1272	nicardipine	0.066	4	-0.219	---	---	0
1273	ricinine	0.041	4	0.218	---	---	25
1274	salbutamol	-0.064	5	-0.218	---	---	20
1275	chlorpromazine	-0.023	19	-0.217	---	---	15
1276	chloropyramine	0.083	4	-0.217	---	---	0
1277	homatropine	0	5	-0.215	---	---	0
1278	alvespimycin	0.079	12	0.213	---	---	33
1279	genistein	-0.125	17	-0.211	---	---	29
1280	flecainide	0.035	6	0.21	---	---	16
1281	phenelzine	0.055	6	-0.209	---	---	0
1282	0179445-0000	0.039	8	-0.209	---	---	0
1283	homosalate	0.06	4	0.208	---	---	25
1284	sirolimus	0.052	44	0.206	---	---	27
1285	paromomycin	0.024	4	0.205	---	---	25
1286	gemfibrozil	0.037	5	0.204	---	---	20
1287	pioglitazone	-0.086	11	-0.201	---	---	27
1288	clenbuterol	-0.063	5	0.2	---	---	20
1289	thalidomide	0.038	7	-0.2	---	---	0
1290	clonidine	-0.065	4	-0.198	---	---	25
1291	nordihydroguaiaretic acid	-0.017	15	-0.197	---	---	13
1292	PF-00562151-00	-0.116	8	-0.197	---	---	25
1293	dihydrostreptomycin	-0.1	5	-0.196	---	---	20
1294	PNU-0230031	-0.007	8	-0.194	---	---	12
1295	hesperidin	0.048	4	0.19	---	---	25
1296	metrizamide	-0.065	4	-0.188	---	---	25
1297	amikacin	-0.046	4	0.187	---	---	25
1298	cyclizine	0.035	4	-0.187	---	---	0
1299	ethoxyquin	-0.048	5	0.187	---	---	20
1300	pentetrazol	0.045	4	-0.183	---	---	0
1301	alpha-ergocryptine	0.026	6	-0.179	---	---	0
1302	valproic acid	0.055	57	0.178	---	---	28
1303	estradiol	-0.046	37	-0.172	---	---	13
1304	tanespimycin	0.011	62	-0.172	---	---	11
1305	pregnenolone	-0.026	4	-0.171	---	---	25
1306	geldanamycin	-0.022	15	-0.17	---	---	13
1307	tretinoin	0.073	22	0.156	---	---	31
1308	fulvestrant	0.012	40	0.15	---	---	32
1309	dicoumarol	0.038	6	-0.132	---	---	0

## Sheet: by cmap name and cell line
rank	cmap name and cell line	mean	n	enrichment	p	specificity	percent non-null
1	anisomycin - MCF7	0.947	2	1	0	0	100
2	cephaeline - MCF7	0.933	3	1	0	0	100
3	emetine - MCF7	0.896	2	0.999	0	0	100
4	cicloheximide - MCF7	0.808	2	0.999	0	0	100
5	pyrvinium - MCF7	0.405	4	0.95	0	0.0227	100
6	vorinostat - MCF7	0.348	7	0.948	0	0.1148	100
7	PNU-0251126 - PC3	-0.585	4	-0.935	0	0	100
8	15-delta prostaglandin J2 - MCF7	0.34	8	0.822	0	0.0359	100
9	tanespimycin - HL60	0.189	12	0.749	0	0.064	91
10	trichostatin A - MCF7	0.226	92	0.723	0	0.1422	71
11	puromycin - MCF7	0.706	2	0.998	2e-05	0.0054	100
12	lanatoside C - MCF7	0.53	3	0.989	2e-05	0.0046	100
13	lanatoside C - PC3	0.531	2	0.994	4e-05	0.0094	100
14	astemizole - MCF7	0.531	2	0.993	4e-05	0.0047	100
15	helveticoside - MCF7	0.499	3	0.985	4e-05	0.0132	100
16	digoxigenin - MCF7	0.45	3	0.968	4e-05	0.0314	100
17	phenoxybenzamine - MCF7	0.39	3	0.968	4e-05	0.1429	100
18	rottlerin - MCF7	0.421	3	0.966	4e-05	0.0155	100
19	thioridazine - PC3	0.338	5	0.913	4e-05	0.0234	100
20	thioridazine - MCF7	0.261	11	0.62	4e-05	0.093	72
21	helveticoside - PC3	0.499	2	0.992	6e-05	0.0085	100
22	ouabain - MCF7	0.517	2	0.991	0.00012	0.0092	100
23	proscillaridin - MCF7	0.519	2	0.99	0.00012	0.0398	100
24	digitoxigenin - MCF7	0.489	2	0.99	0.00012	0.0133	100
25	terfenadine - MCF7	0.501	2	0.99	0.00012	0.0052	100
26	thapsigargin - MCF7	0.461	2	0.989	0.00016	0.0719	100
27	bisacodyl - MCF7	0.467	2	0.989	0.00016	0.0093	100
28	5224221 - MCF7	0.481	2	0.988	0.00018	0.0447	100
29	fluphenazine - MCF7	0.159	10	0.627	0.00024	0.0526	60
30	proguanil - MCF7	-0.671	2	-0.989	0.00026	0	100
31	gossypol - MCF7	0.37	3	0.94	0.00028	0	100
32	digoxin - MCF7	0.501	2	0.987	0.00032	0.0089	100
33	prenylamine - MCF7	0.489	2	0.986	0.00036	0.0146	100
34	valinomycin - MCF7	0.427	2	0.985	0.00044	0	100
35	pimozide - MCF7	0.456	2	0.984	0.00048	0	100
36	disulfiram - MCF7	0.446	2	0.984	0.00048	0.0114	100
37	fluspirilene - MCF7	0.421	2	0.983	0.00052	0	100
38	suloctidil - MCF7	0.471	2	0.983	0.00054	0.0047	100
39	naftifine - MCF7	0.413	2	0.981	0.00064	0.0061	100
40	ivermectin - MCF7	0.447	2	0.981	0.00068	0.0152	100
41	chloropyrazine - MCF7	-0.654	2	-0.982	0.0007	0	100
42	fendiline - MCF7	0.429	2	0.98	0.0007	0.0094	100
43	calmidazolium - MCF7	0.435	2	0.979	0.00076	0.0158	100
44	niclosamide - MCF7	0.398	2	0.977	0.00084	0.0251	100
45	LY-294002 - MCF7	0.141	34	0.334	0.00084	0.4079	50
46	propofol - MCF7	0.394	2	0.977	0.00087	0.0054	100
47	felodipine - MCF7	0.368	5	0.781	0.00106	0.0148	80
48	thioridazine - HL60	0.274	4	0.837	0.00109	0.1106	100
49	azacyclonol - MCF7	0.457	2	0.973	0.00111	0.0277	100
50	cloperastine - MCF7	0.354	3	0.918	0.00116	0	100
51	parthenolide - MCF7	0.443	2	0.973	0.00117	0.0667	100
52	LY-294002 - HL60	0.161	13	0.51	0.00134	0.1319	69
53	bepridil - MCF7	0.374	2	0.971	0.00135	0	100
54	dobutamine - MCF7	-0.639	2	-0.975	0.00137	0	100
55	isoconazole - MCF7	0.366	2	0.969	0.00165	0	100
56	clomifene - MCF7	0.376	2	0.969	0.00167	0.0112	100
57	perhexiline - MCF7	0.397	2	0.969	0.00171	0.0441	100
58	clorgiline - MCF7	0.374	2	0.968	0.00173	0	100
59	ondansetron - MCF7	-0.594	2	-0.97	0.00191	0	100
60	dicycloverine - MCF7	0.363	2	0.966	0.00205	0.0053	100
61	mefloquine - MCF7	0.464	2	0.965	0.00207	0.0266	100
62	colforsin - PC3	-0.622	2	-0.969	0.00217	0	100
63	trifluoperazine - PC3	0.273	3	0.896	0.00218	0.1122	100
64	proadifen - MCF7	0.368	2	0.964	0.00221	0.0148	100
65	withaferin A - MCF7	0.361	2	0.963	0.00231	0.0794	100
66	wortmannin - HL60	0.196	4	0.811	0.00237	0.0194	100
67	blebbistatin - MCF7	0.353	2	0.961	0.00262	0	100
68	mycophenolic acid - MCF7	-0.633	2	-0.965	0.00268	0.0291	100
69	diazoxide - MCF7	-0.619	2	-0.965	0.00274	0.0067	100
70	dequalinium chloride - MCF7	0.363	2	0.96	0.00274	0.0276	100
71	MG-262 - PC3	0.344	2	0.959	0.00284	0.1947	100
72	clotrimazole - MCF7	0.353	3	0.887	0.00292	0.0323	100
73	vanoxerine - MCF7	0.384	2	0.957	0.00324	0.0114	100
74	clioquinol - MCF7	0.323	3	0.882	0.00324	0.0568	100
75	amrinone - MCF7	-0.593	2	-0.959	0.00366	0.0191	100
76	benzethonium chloride - MCF7	0.341	2	0.954	0.00382	0.0538	100
77	flutamide - MCF7	-0.566	2	-0.956	0.00402	0.0068	100
78	15-delta prostaglandin J2 - HL60	0.268	3	0.87	0.00403	0.157	100
79	5248896 - MCF7	0.333	2	0.952	0.0041	0	100
80	oxybutynin - MCF7	0.372	2	0.951	0.00425	0.006	100
81	hycanthone - MCF7	0.334	2	0.95	0.00455	0.0681	100
82	hesperetin - PC3	-0.553	2	-0.953	0.00467	0.0053	100
83	sulconazole - MCF7	0.347	2	0.949	0.00477	0.051	100
84	rilmenidine - MCF7	-0.576	2	-0.952	0.00485	0.0059	100
85	0297417-0002B - MCF7	0.34	2	0.948	0.00485	0.0509	100
86	5707885 - MCF7	0.332	2	0.948	0.00489	0.0101	100
87	abamectin - MCF7	0.326	2	0.947	0.00519	0.0174	100
88	raubasine - MCF7	-0.592	2	-0.951	0.00531	0	100
89	econazole - MCF7	0.35	2	0.945	0.00577	0.0367	100
90	mebhydrolin - MCF7	-0.599	2	-0.948	0.00588	0.0064	100
91	niclosamide - PC3	0.334	2	0.944	0.0059	0.0471	100
92	clofilium tosylate - MCF7	0.319	2	0.944	0.00604	0.025	100
93	valinomycin - PC3	0.361	2	0.943	0.00618	0.0273	100
94	foliosidine - MCF7	0.219	3	0.85	0.00631	0	100
95	miconazole - MCF7	0.368	2	0.942	0.00632	0.0153	100
96	mefloquine - PC3	0.341	2	0.94	0.0068	0.1122	100
97	troglitazone - HL60	-0.297	4	-0.758	0.007	0.0219	75
98	hexestrol - MCF7	0.316	2	0.938	0.00744	0.0169	100
99	ticlopidine - MCF7	0.345	2	0.938	0.00757	0.0213	100
100	nifuroxazide - MCF7	0.358	2	0.936	0.00781	0.0407	100
101	mebendazole - MCF7	0.339	2	0.936	0.00783	0.0919	100
102	azacyclonol - PC3	0.336	2	0.935	0.00803	0.0955	100
103	aztreonam - PC3	-0.595	2	-0.938	0.00807	0.0253	100
104	astemizole - PC3	0.333	2	0.935	0.00807	0.125	100
105	geldanamycin - HL60	0.224	3	0.839	0.00815	0.0678	100
106	tretinoin - HL60	0.155	5	0.682	0.00827	0.1842	80
107	mianserin - PC3	0.323	2	0.932	0.00865	0.041	100
108	glafenine - MCF7	0.303	2	0.931	0.00893	0.0305	100
109	quinostatin - MCF7	0.328	2	0.928	0.01006	0.1216	100
110	beta-escin - PC3	0.353	2	0.926	0.01064	0.0732	100
111	LY-294002 - PC3	0.15	12	0.442	0.01143	0.2867	58
112	thioguanosine - MCF7	0.304	2	0.923	0.01149	0.1389	100
113	lynestrenol - PC3	-0.465	2	-0.923	0.01205	0.0133	100
114	5230742 - MCF7	0.303	2	0.921	0.01241	0.0078	100
115	securinine - MCF7	0.318	2	0.92	0.01247	0.1111	100
116	metergoline - MCF7	0.293	2	0.92	0.01272	0.0219	100
117	5252917 - MCF7	0.293	2	0.913	0.01495	0.0137	100
118	loperamide - MCF7	0.215	3	0.801	0.01604	0.1015	66
119	nocodazole - PC3	0.294	2	0.91	0.01622	0.0796	100
120	AR-A014418 - PC3	0.292	2	0.91	0.01648	0.028	100
121	withaferin A - PC3	0.293	2	0.91	0.01664	0.1615	100
122	doxorubicin - MCF7	-0.5	2	-0.908	0.01678	0.1638	50
123	acacetin - PC3	-0.318	2	-0.908	0.01692	0.0253	50
124	amoxapine - MCF7	0.285	2	0.908	0.01718	0.0254	100
125	prochlorperazine - HL60	0.17	4	0.697	0.01733	0.0348	75
126	alexidine - PC3	0.289	2	0.908	0.01762	0.1868	100
127	prochlorperazine - MCF7	0.175	9	0.484	0.01772	0.3632	55
128	5707885 - PC3	0.288	2	0.905	0.01839	0.0532	100
129	captopril - PC3	-0.237	2	-0.904	0.01839	0.0192	50
130	piracetam - MCF7	-0.263	2	-0.903	0.01869	0	50
131	cefixime - MCF7	-0.327	2	-0.903	0.01887	0	50
132	sirolimus - HL60	0.081	10	0.459	0.01926	0.0764	60
133	monorden - MCF7	0.114	12	0.418	0.01944	0.2727	58
134	gossypol - PC3	0.305	2	0.902	0.01968	0.0517	100
135	disulfiram - PC3	0.3	2	0.901	0.01992	0.1186	100
136	alsterpaullone - PC3	-0.402	2	-0.898	0.02072	0.1522	50
137	prilocaine - PC3	-0.247	2	-0.897	0.02131	0.0057	50
138	mesoridazine - MCF7	-0.309	2	-0.896	0.02131	0.0258	50
139	fluphenazine - PC3	0.145	3	0.781	0.02135	0.1436	66
140	phenylpropanolamine - MCF7	0.316	2	0.898	0.02167	0.0258	100
141	0198306-0000 - PC3	-0.294	2	-0.896	0.02167	0.0214	50
142	dydrogesterone - MCF7	-0.316	2	-0.895	0.02207	0.0183	50
143	cyclopenthiazide - MCF7	-0.325	2	-0.893	0.02284	0.0213	50
144	chlorcyclizine - MCF7	0.22	3	0.776	0.02285	0.0181	66
145	homochlorcyclizine - MCF7	0.277	2	0.894	0.02338	0.1436	100
146	atropine oxide - PC3	-0.288	2	-0.892	0.02338	0.0109	50
147	ramipril - MCF7	-0.314	2	-0.892	0.02352	0.0063	50
148	spectinomycin - MCF7	-0.273	2	-0.89	0.02388	0.0179	50
149	butoconazole - MCF7	0.28	2	0.891	0.02487	0.0444	100
150	nocodazole - MCF7	0.172	3	0.767	0.0252	0.0747	66
151	oxybuprocaine - MCF7	-0.343	2	-0.887	0.02523	0.0179	50
152	griseofulvin - MCF7	-0.276	2	-0.884	0.02712	0.0171	50
153	tonzonium bromide - MCF7	0.251	2	0.883	0.02819	0.0807	100
154	raloxifene - MCF7	0.16	3	0.756	0.02862	0.0898	66
155	STOCK1N-35874 - PC3	0.251	2	0.879	0.02915	0.0559	100
156	harmol - MCF7	0.241	2	0.879	0.02919	0.1019	100
157	hydralazine - PC3	-0.26	2	-0.878	0.02994	0.0226	50
158	cytisine - MCF7	-0.321	2	-0.875	0.03143	0	50
159	pentoxyverine - MCF7	-0.258	2	-0.874	0.03161	0.0259	50
160	diprophylline - MCF7	0.245	2	0.874	0.03201	0.0148	100
161	atropine oxide - MCF7	0.237	2	0.871	0.03354	0.0181	100
162	mephenesin - MCF7	-0.259	2	-0.867	0.03501	0.0245	50
163	sparteine - MCF7	-0.302	2	-0.867	0.03517	0.0457	50
164	clomipramine - MCF7	0.289	2	0.868	0.03565	0.0576	100
165	SR-95531 - MCF7	-0.314	2	-0.865	0.03628	0.0171	50
166	cyclopentolate - MCF7	-0.356	2	-0.865	0.03634	0.0255	50
167	etoposide - MCF7	0.263	2	0.866	0.03648	0.2135	100
168	orphenadrine - PC3	0.23	2	0.865	0.0372	0.0714	100
169	antimycin A - MCF7	0.267	2	0.864	0.03772	0.0711	100
170	cefuroxime - MCF7	-0.312	2	-0.861	0.03845	0.0186	50
171	progesterone - MCF7	-0.27	2	-0.861	0.03849	0.0438	50
172	(+/-)-catechin - MCF7	-0.317	2	-0.859	0.03974	0.018	50
173	chlorcyclizine - PC3	0.244	2	0.858	0.04054	0.1509	100
174	liothyronine - MCF7	-0.286	2	-0.857	0.04098	0.0598	50
175	lithocholic acid - PC3	0.235	2	0.857	0.04151	0.0517	100
176	propoxycaine - MCF7	-0.276	2	-0.855	0.04185	0.0215	50
177	wortmannin - PC3	0.236	2	0.856	0.04199	0.1807	100
178	STOCK1N-35215 - PC3	0.284	2	0.855	0.04277	0.0925	100
179	famotidine - PC3	-0.242	2	-0.852	0.04388	0.0457	50
180	salsolinol - MCF7	-0.331	2	-0.851	0.04428	0.0058	50
181	resveratrol - MCF7	0.096	6	0.525	0.04575	0.5211	66
182	lycorine - MCF7	0.448	3	0.712	0.04649	0.1503	66
183	pioglitazone - MCF7	0.034	6	0.523	0.04724	0.0355	50
184	dipivefrine - MCF7	-0.34	2	-0.846	0.0475	0.0482	50
185	levodopa - MCF7	-0.373	2	-0.836	0.05404	0.0357	50
186	loperamide - PC3	0.236	2	0.834	0.05533	0.0828	100
187	riluzole - PC3	-0.305	2	-0.83	0.05728	0.0539	50
188	nifurtimox - MCF7	-0.312	2	-0.829	0.05734	0.0524	50
189	2,6-dimethylpiperidine - PC3	-0.207	2	-0.826	0.05947	0.0438	50
190	cefadroxil - MCF7	-0.378	2	-0.824	0.0611	0.0874	50
191	sulfamethoxazole - MCF7	-0.369	2	-0.82	0.06412	0.022	50
192	meprylcaine - MCF7	-0.292	2	-0.818	0.06555	0.0511	50
193	meclocycline - MCF7	-0.33	2	-0.817	0.06672	0.0199	50
194	Prestwick-857 - MCF7	-0.275	2	-0.816	0.06742	0.0988	50
195	alprenolol - MCF7	-0.348	2	-0.812	0.07004	0.0609	50
196	hydroxyzine - MCF7	-0.384	2	-0.81	0.07219	0.033	50
197	dimethadione - MCF7	-0.362	2	-0.808	0.07304	0.0791	50
198	trifluoperazine - HL60	0.164	4	0.589	0.07537	0.1902	75
199	diltiazem - PC3	-0.214	2	-0.801	0.0776	0.0876	50
200	tamoxifen - MCF7	0.277	4	0.587	0.07766	0.1152	75
201	genistein - HL60	0.128	3	0.661	0.07804	0.1809	66
202	lynestrenol - MCF7	0.18	2	0.802	0.0798	0.0746	50
203	syrosingopine - MCF7	0.178	2	0.801	0.08026	0.21	50
204	zidovudine - MCF7	-0.295	2	-0.797	0.08048	0.0977	50
205	hexetidine - MCF7	0.165	2	0.8	0.08068	0.1078	50
206	chlorprothixene - MCF7	0.205	2	0.799	0.08126	0.0625	50
207	amitriptyline - PC3	0.127	2	0.799	0.08136	0.1634	50
208	vorinostat - PC3	0.169	2	0.798	0.08211	0.2613	50
209	rifabutin - MCF7	0.134	2	0.797	0.08257	0.1543	50
210	5253409 - MCF7	0.201	2	0.797	0.08281	0.0872	50
211	16-phenyltetranorprostaglandin E2 - PC3	-0.293	2	-0.793	0.08348	0.1103	50
212	etifenin - MCF7	-0.274	2	-0.793	0.08388	0.0667	50
213	dihydrostreptomycin - MCF7	-0.315	2	-0.792	0.08436	0.0298	50
214	triamterene - PC3	0.115	2	0.795	0.08446	0.1437	50
215	benfluorex - MCF7	0.186	2	0.794	0.08541	0.0872	50
216	dexibuprofen - MCF7	-0.256	2	-0.788	0.08748	0.0651	50
217	scriptaid - PC3	0.146	2	0.791	0.08766	0.2294	50
218	fluphenazine - HL60	0.147	4	0.572	0.09117	0.2222	75
219	gallamine triethiodide - PC3	-0.252	2	-0.781	0.09422	0.1471	50
220	doxycycline - MCF7	-0.43	3	-0.64	0.09462	0.1543	66
221	aminophylline - MCF7	-0.298	2	-0.78	0.09489	0.1	50
222	hexylcaine - MCF7	-0.295	2	-0.78	0.09495	0.0294	50
223	idoxuridine - PC3	0.11	2	0.779	0.09827	0.1296	50
224	oxyphenbutazone - MCF7	0.173	2	0.779	0.09845	0.2289	50
225	drofenine - MCF7	0.173	2	0.778	0.09875	0.0824	50
226	perphenazine - PC3	0.104	2	0.778	0.09895	0.1912	50
227	methocarbamol - MCF7	-0.308	2	-0.775	0.1005	0.082	50
228	vincamine - PC3	0.086	2	0.775	0.10183	0.1918	50
229	5211181 - MCF7	0.165	2	0.774	0.10285	0.1073	50
230	erythromycin - PC3	-0.256	2	-0.767	0.10668	0.0829	50
231	naltrexone - MCF7	-0.328	2	-0.766	0.10738	0.1392	50
232	depudecin - MCF7	0.157	2	0.769	0.10742	0.075	50
233	tiletamine - MCF7	-0.27	2	-0.765	0.10806	0.1111	50
234	prasterone - MCF7	0.16	2	0.765	0.11146	0.1373	50
235	suprofen - MCF7	-0.323	2	-0.761	0.11261	0.1117	50
236	halcinonide - PC3	-0.23	2	-0.759	0.11462	0.1932	50
237	pivampicillin - MCF7	-0.288	2	-0.758	0.11557	0.1494	50
238	naftidrofuryl - MCF7	0.11	2	0.76	0.11597	0.1173	50
239	clindamycin - PC3	-0.32	2	-0.757	0.11631	0.1297	50
240	leflunomide - MCF7	0.129	2	0.755	0.12058	0.1688	50
241	flupentixol - MCF7	0.129	2	0.754	0.1211	0.2051	50
242	Prestwick-689 - MCF7	-0.273	2	-0.751	0.12241	0.125	50
243	ioxaglic acid - MCF7	-0.348	2	-0.75	0.12329	0.0736	50
244	spiradoline - MCF7	0.104	2	0.751	0.12346	0.1429	50
245	nortriptyline - MCF7	0.127	2	0.75	0.12462	0.2488	50
246	tribenoside - MCF7	0.191	2	0.747	0.1274	0.129	50
247	F0447-0125 - PC3	0.14	2	0.747	0.12774	0.2154	50
248	profenamine - MCF7	0.128	2	0.745	0.12869	0.1724	50
249	tetrandrine - MCF7	0.106	2	0.743	0.13116	0.1753	50
250	chloroquine - MCF7	-0.298	2	-0.741	0.13227	0.0932	50
251	napelline - MCF7	-0.261	2	-0.741	0.13281	0.0839	50
252	tropicamide - PC3	-0.211	2	-0.74	0.13378	0.0867	50
253	cyproheptadine - MCF7	0.207	2	0.741	0.1338	0.1633	50
254	nabumetone - MCF7	-0.277	2	-0.74	0.13412	0.1241	50
255	5155877 - MCF7	0.139	2	0.74	0.13436	0.2279	50
256	meclozine - MCF7	0.23	3	0.605	0.13531	0.2455	66
257	hemicholinium - MCF7	-0.313	2	-0.739	0.13551	0.1939	50
258	zardaverine - MCF7	0.119	2	0.737	0.13734	0.1769	50
259	naringin - MCF7	-0.363	2	-0.731	0.14408	0.1864	50
260	amphotericin B - MCF7	0.156	2	0.73	0.14468	0.122	50
261	genistein - PC3	-0.359	3	-0.596	0.1467	0.2761	66
262	proxymetacaine - MCF7	-0.263	2	-0.728	0.1474	0.0779	50
263	desipramine - MCF7	0.129	2	0.728	0.1478	0.1899	50
264	ifosfamide - MCF7	0.138	2	0.725	0.15094	0.0851	50
265	altizide - MCF7	-0.238	2	-0.722	0.15448	0.1088	50
266	daunorubicin - MCF7	0.218	3	0.591	0.15532	0.4612	66
267	mebeverine - MCF7	-0.289	2	-0.72	0.15611	0.1234	50
268	methylbenzethonium chloride - MCF7	0.197	3	0.589	0.15782	0.42	66
269	metronidazole - PC3	0.092	2	0.717	0.15935	0.2403	50
270	sulfaphenazole - MCF7	-0.313	2	-0.716	0.16052	0.2036	50
271	pridinol - MCF7	-0.328	2	-0.715	0.16188	0.1676	50
272	prednisone - MCF7	-0.308	2	-0.715	0.16255	0.0903	50
273	isopropamide iodide - MCF7	0.151	2	0.714	0.16355	0.073	50
274	oxybenzone - MCF7	0.122	2	0.713	0.16438	0.2242	50
275	idoxuridine - MCF7	0.124	2	0.712	0.16486	0.1747	50
276	Gly-His-Lys - PC3	0.121	2	0.712	0.16587	0.3029	50
277	prochlorperazine - PC3	0.198	3	0.584	0.16655	0.2708	66
278	chlorhexidine - MCF7	0.174	2	0.709	0.16933	0.1281	50
279	ornidazole - MCF7	-0.294	2	-0.708	0.17003	0.1676	50
280	phenazopyridine - MCF7	0.129	2	0.707	0.1713	0.2	50
281	ursolic acid - MCF7	0.141	2	0.707	0.17154	0.2304	50
282	BAS-012416453 - MCF7	-0.32	2	-0.705	0.17398	0.1779	50
283	fenofibrate - MCF7	0.122	2	0.705	0.17444	0.2403	50
284	colforsin - MCF7	0.122	2	0.704	0.17516	0.2263	50
285	ketorolac - MCF7	-0.368	2	-0.703	0.17661	0.2254	50
286	arcaine - MCF7	0.125	2	0.702	0.1772	0.2188	50
287	SC-19220 - MCF7	0.155	2	0.699	0.18035	0.1742	50
288	11-deoxy-16,16-dimethylprostaglandin E2 - PC3	-0.291	2	-0.698	0.18213	0.2185	50
289	eticlopride - MCF7	0.144	2	0.696	0.18392	0.2147	50
290	benzonatate - PC3	-0.351	2	-0.696	0.1849	0.0971	50
291	strophanthidin - MCF7	0.25	2	0.695	0.18549	0.2618	50
292	piperacetazine - MCF7	0.13	2	0.695	0.18565	0.25	50
293	velnacrine - MCF7	-0.34	2	-0.695	0.18571	0.1138	50
294	dienestrol - MCF7	0.186	2	0.695	0.18575	0.2097	50
295	apomorphine - MCF7	-0.313	2	-0.694	0.18657	0.1976	50
296	hydroquinine - MCF7	0.151	2	0.693	0.1885	0.1479	50
297	bisoprolol - MCF7	0.13	2	0.692	0.18897	0.1139	50
298	isotretinoin - MCF7	0.144	2	0.691	0.19027	0.2294	50
299	methanthelinium bromide - MCF7	-0.288	2	-0.69	0.19138	0.2011	50
300	oxolinic acid - PC3	-0.287	2	-0.689	0.19267	0.2	50
301	hymecromone - MCF7	-0.228	2	-0.687	0.19577	0.1586	50
302	0317956-0000 - MCF7	0.131	4	0.491	0.19676	0.3875	50
303	pinacidil - MCF7	-0.337	2	-0.686	0.19689	0.1258	50
304	monastrol - MCF7	0.056	7	0.382	0.19742	0.3871	57
305	colecalciferol - MCF7	-0.326	2	-0.683	0.201	0.2294	50
306	mometasone - MCF7	0.22	2	0.683	0.20118	0.2381	50
307	PNU-0230031 - MCF7	0.116	4	0.488	0.20237	0.1473	50
308	isradipine - MCF7	0.147	2	0.676	0.20921	0.2067	50
309	rosiglitazone - HL60	-0.235	4	-0.485	0.21198	0.2267	50
310	oxetacaine - PC3	-0.23	2	-0.674	0.21357	0.2027	50
311	15-delta prostaglandin J2 - PC3	0.185	3	0.554	0.21745	0.5241	66
312	STOCK1N-28457 - MCF7	-0.315	2	-0.67	0.21838	0.2757	50
313	diclofenac - PC3	-0.159	2	-0.67	0.21858	0.2971	50
314	norethisterone - MCF7	-0.306	2	-0.669	0.22003	0.2368	50
315	vinburnine - MCF7	-0.325	2	-0.668	0.2212	0.2771	50
316	ivermectin - PC3	0.133	2	0.667	0.22178	0.3167	50
317	CAY-10397 - PC3	0.114	2	0.662	0.22903	0.1884	50
318	kinetin - MCF7	-0.298	2	-0.661	0.23029	0.183	50
319	oleandomycin - PC3	-0.258	2	-0.661	0.2313	0.2363	50
320	PNU-0293363 - PC3	-0.329	2	-0.66	0.23182	0.1829	50
321	gibberellic acid - MCF7	-0.356	2	-0.66	0.23222	0.3106	50
322	mephenytoin - MCF7	-0.375	2	-0.657	0.2355	0.1749	50
323	monorden - HL60	0.09	4	0.471	0.23569	0.3967	50
324	piribedil - MCF7	-0.357	2	-0.657	0.23627	0.1768	50
325	chlorambucil - MCF7	-0.261	2	-0.657	0.23649	0.156	50
326	0173570-0000 - PC3	-0.306	4	-0.472	0.23923	0.3968	50
327	semustine - PC3	0.103	2	0.653	0.2408	0.4824	50
328	clobetasol - MCF7	-0.278	2	-0.652	0.24301	0.1679	50
329	pizotifen - MCF7	0.145	2	0.651	0.24468	0.2775	50
330	thiamine - MCF7	-0.292	2	-0.651	0.24482	0.2363	50
331	oxetacaine - MCF7	-0.269	2	-0.65	0.24554	0.3282	50
332	triamterene - MCF7	0.169	2	0.649	0.24597	0.1818	50
333	doxylamine - MCF7	-0.282	2	-0.646	0.25154	0.3353	50
334	alpha-yohimbine - MCF7	0.124	2	0.645	0.25263	0.2811	50
335	edrophonium chloride - PC3	-0.278	2	-0.644	0.25506	0.3316	50
336	5155877 - PC3	0.116	2	0.642	0.25741	0.3846	50
337	alverine - PC3	0.134	2	0.64	0.25902	0.2715	50
338	midodrine - MCF7	0.115	2	0.638	0.26128	0.2695	50
339	clozapine - PC3	0.163	3	0.532	0.26134	0.2366	66
340	lincomycin - MCF7	0.117	2	0.636	0.26391	0.16	50
341	cefapirin - MCF7	-0.341	2	-0.636	0.2655	0.3423	50
342	ascorbic acid - MCF7	0.1	2	0.635	0.26609	0.3247	50
343	betulin - MCF7	-0.286	2	-0.635	0.26816	0.1524	50
344	triamcinolone - MCF7	0.126	2	0.629	0.27474	0.2201	50
345	danazol - MCF7	0.17	2	0.629	0.27538	0.2061	50
346	oxaprozin - MCF7	0.176	4	0.454	0.2757	0.4706	50
347	ergocalciferol - MCF7	0.129	2	0.625	0.28122	0.3563	50
348	chlorpromazine - PC3	0.17	4	0.451	0.28166	0.4197	50
349	fulvestrant - HL60	0.07	6	0.375	0.28714	0.4492	50
350	cefamandole - MCF7	0.133	2	0.621	0.2881	0.5191	50
351	epiandrosterone - MCF7	-0.274	2	-0.62	0.29097	0.3129	50
352	dicycloverine - PC3	0.115	2	0.618	0.29335	0.4012	50
353	harmalol - MCF7	0.113	2	0.617	0.29381	0.2336	50
354	praziquantel - MCF7	-0.218	2	-0.618	0.29458	0.2612	50
355	PF-00562151-00 - PC3	-0.28	4	-0.447	0.29726	0.3313	50
356	suramin sodium - MCF7	-0.314	2	-0.616	0.29796	0.4056	50
357	pheneticillin - MCF7	0.115	2	0.615	0.29832	0.3139	50
358	amoxapine - PC3	-0.235	2	-0.615	0.29908	0.3129	50
359	pregnenolone - MCF7	0.135	2	0.612	0.30178	0.5307	50
360	diazoxide - PC3	-0.317	2	-0.612	0.30403	0.3057	50
361	nordihydroguaiaretic acid - ssMCF7	-0.178	2	-0.611	0.30558	0.2264	50
362	tridihexethyl - MCF7	-0.342	2	-0.61	0.30635	0.2738	50
363	citalopram - PC3	0.104	2	0.609	0.30677	0.3905	50
364	piretanide - MCF7	-0.305	2	-0.606	0.31393	0.3409	50
365	cyproheptadine - PC3	0.136	2	0.604	0.31474	0.2398	50
366	metrizamide - MCF7	0.106	2	0.603	0.31576	0.425	50
367	salbutamol - PC3	-0.283	2	-0.604	0.31626	0.3901	50
368	metanephrine - PC3	-0.266	2	-0.599	0.32373	0.3706	50
369	PHA-00767505E - MCF7	0.125	2	0.597	0.32707	0.3083	50
370	clonidine - MCF7	-0.257	2	-0.593	0.33284	0.2237	50
371	kaempferol - MCF7	-0.364	2	-0.592	0.33488	0.2887	50
372	7-aminocephalosporanic acid - MCF7	-0.321	2	-0.592	0.33562	0.2386	50
373	benzamil - PC3	0.105	2	0.588	0.34067	0.4025	50
374	lymecycline - MCF7	-0.28	2	-0.586	0.34486	0.256	50
375	naproxen - HL60	0.075	2	0.585	0.34488	0.4751	50
376	cinchocaine - MCF7	-0.304	2	-0.584	0.34906	0.3665	50
377	fluorometholone - MCF7	0.146	2	0.58	0.35329	0.3571	50
378	tetracycline - PC3	0.126	2	0.576	0.36081	0.4795	50
379	levothyroxine sodium - MCF7	0.162	2	0.573	0.36544	0.2891	50
380	nalbuphine - PC3	0.121	2	0.572	0.36769	0.4925	50
381	PF-01378883-00 - PC3	-0.276	2	-0.57	0.37117	0.3254	50
382	Prestwick-981 - MCF7	-0.297	2	-0.57	0.37153	0.2938	50
383	sulfachlorpyridazine - PC3	0.088	2	0.567	0.37508	0.2137	50
384	nimesulide - MCF7	0.113	2	0.564	0.37976	0.2857	50
385	ethotoin - PC3	-0.283	2	-0.56	0.38902	0.5198	50
386	bendroflumethiazide - PC3	-0.212	2	-0.555	0.39775	0.3608	50
387	prazosin - MCF7	0.14	4	0.409	0.39858	0.4675	50
388	clindamycin - MCF7	-0.257	2	-0.554	0.3989	0.3791	50
389	W-13 - MCF7	0.077	2	0.552	0.40047	0.4969	50
390	AG-028671 - PC3	-0.294	2	-0.55	0.40483	0.52	50
391	tolnaftate - PC3	-0.186	2	-0.545	0.41447	0.5	50
392	sodium phenylbutyrate - HL60	0.054	2	0.538	0.42769	0.4533	50
393	arachidonyltrifluoromethane - MCF7	0.078	2	0.518	0.4638	0.6541	50
394	NU-1025 - MCF7	0.075	2	0.509	0.48097	0.4603	50
395	PF-01378883-00 - MCF7	-0.179	2	-0.507	0.48567	0.4899	50
396	sulfadimethoxine - MCF7	-0.412	2	-0.5	0.49964	0.6549	50
397	pilocarpine - MCF7	-0.399	2	-0.5	0.50066	0.6184	50
398	fluvoxamine - MCF7	-0.282	2	-0.499	0.50215	0.4277	50
399	metolazone - MCF7	-0.367	2	-0.497	0.50889	0.6143	50
400	etynodiol - MCF7	-0.361	2	-0.497	0.51243	0.3256	50
401	meglumine - MCF7	-0.36	2	-0.496	0.51435	0.6093	50
402	guanadrel - MCF7	-0.36	2	-0.496	0.51485	0.6494	50
403	minoxidil - MCF7	-0.359	2	-0.496	0.51543	0.6938	50
404	ribavirin - MCF7	-0.359	2	-0.496	0.5163	0.5405	50
405	Prestwick-642 - MCF7	-0.358	2	-0.495	0.51698	0.7754	50
406	clorsulon - MCF7	-0.35	2	-0.494	0.52074	0.6667	50
407	amantadine - MCF7	-0.349	2	-0.494	0.52153	0.5306	50
408	arecoline - MCF7	-0.346	2	-0.493	0.52535	0.6688	50
409	lobelanidine - MCF7	-0.342	2	-0.492	0.52881	0.6108	50
410	aceclofenac - MCF7	-0.237	2	-0.491	0.53263	0.6524	50
411	atractyloside - PC3	-0.338	2	-0.491	0.53501	0.5	50
412	guanabenz - MCF7	-0.336	2	-0.49	0.5371	0.5294	50
413	alimemazine - MCF7	-0.212	2	-0.49	0.53764	0.5694	50
414	epitiostanol - MCF7	-0.335	2	-0.49	0.53839	0.6282	50
415	isoxsuprine - MCF7	-0.335	2	-0.49	0.53893	0.4859	50
416	resveratrol - PC3	-0.333	2	-0.489	0.53954	0.5887	50
417	isoxsuprine - PC3	-0.235	2	-0.489	0.54026	0.5959	50
418	esculetin - MCF7	-0.332	2	-0.489	0.54302	0.5705	50
419	PNU-0251126 - MCF7	-0.328	2	-0.487	0.54952	0.6027	50
420	AH-6809 - PC3	-0.326	2	-0.486	0.55207	0.5978	50
421	josamycin - MCF7	-0.326	2	-0.486	0.55286	0.5796	50
422	iopanoic acid - MCF7	-0.321	2	-0.485	0.55845	0.6236	50
423	azacitidine - MCF7	0.21	2	0.484	0.56213	0.797	50
424	butacaine - MCF7	-0.199	2	-0.484	0.56229	0.4881	50
425	niflumic acid - MCF7	-0.317	2	-0.483	0.56448	0.4939	50
426	methylbenzethonium chloride - PC3	0.179	2	0.483	0.56517	0.8256	50
427	sulfamonomethoxine - MCF7	-0.316	2	-0.482	0.56615	0.6962	50
428	dosulepin - MCF7	-0.188	2	-0.482	0.56678	0.496	50
429	adrenosterone - MCF7	-0.189	2	-0.482	0.56736	0.6309	50
430	halofantrine - MCF7	-0.316	2	-0.482	0.56813	0.4825	50
431	amodiaquine - MCF7	0.128	2	0.48	0.57398	0.6543	50
432	methotrexate - HL60	-0.237	2	-0.48	0.57668	0.6788	50
433	glycocholic acid - MCF7	-0.156	2	-0.479	0.57919	0.6149	50
434	todralazine - PC3	-0.194	2	-0.479	0.57988	0.5906	50
435	diprophylline - PC3	-0.31	2	-0.478	0.58102	0.5909	50
436	tracazolate - MCF7	0.197	2	0.478	0.58177	0.465	50
437	chlortalidone - MCF7	-0.309	2	-0.478	0.58227	0.7012	50
438	5255229 - MCF7	0.196	2	0.478	0.58251	0.5368	50
439	iproniazid - MCF7	-0.308	2	-0.478	0.58281	0.5473	50
440	0316684-0000 - PC3	-0.307	2	-0.477	0.58485	0.6144	50
441	thiostrepton - MCF7	0.194	2	0.477	0.58613	0.8592	50
442	isocarboxazid - PC3	-0.304	2	-0.476	0.59024	0.5497	50
443	cefotaxime - PC3	-0.303	2	-0.475	0.59225	0.6429	50
444	hydrastinine - MCF7	-0.3	2	-0.474	0.59627	0.5714	50
445	guanabenz - PC3	-0.3	2	-0.474	0.59688	0.6304	50
446	colistin - MCF7	-0.298	2	-0.474	0.59849	0.5649	50
447	CP-690334-01 - MCF7	0.115	4	0.35	0.60031	0.6205	50
448	atracurium besilate - MCF7	-0.298	2	-0.473	0.60112	0.558	50
449	iopromide - MCF7	-0.296	2	-0.472	0.60315	0.7143	50
450	alclometasone - MCF7	0.125	2	0.472	0.6038	0.4621	50
451	0198306-0000 - MCF7	-0.141	2	-0.472	0.60575	0.7059	50
452	iloprost - MCF7	-0.224	2	-0.471	0.6099	0.559	50
453	megestrol - MCF7	-0.173	2	-0.47	0.61054	0.5396	50
454	dropropizine - MCF7	-0.176	2	-0.47	0.61112	0.6957	50
455	tetracaine - MCF7	-0.293	2	-0.47	0.61163	0.4546	50
456	sulfaquinoxaline - MCF7	-0.292	2	-0.469	0.61452	0.6042	50
457	carbenoxolone - MCF7	-0.292	2	-0.469	0.61653	0.6216	50
458	noretynodrel - MCF7	-0.157	2	-0.469	0.6171	0.7671	50
459	exisulind - MCF7	-0.156	2	-0.468	0.61869	0.523	50
460	Chicago Sky Blue 6B - MCF7	-0.29	2	-0.468	0.62052	0.6783	50
461	estropipate - MCF7	-0.289	2	-0.467	0.62446	0.6338	50
462	MK-886 - MCF7	-0.165	2	-0.466	0.62521	0.5629	50
463	etilefrine - MCF7	-0.288	2	-0.466	0.62826	0.7564	50
464	diethylstilbestrol - PC3	0.124	2	0.465	0.62885	0.6522	50
465	isometheptene - MCF7	-0.288	2	-0.465	0.62889	0.6	50
466	trimipramine - MCF7	0.178	2	0.465	0.6306	0.6648	50
467	lisuride - PC3	-0.287	2	-0.465	0.63104	0.6894	50
468	orciprenaline - MCF7	-0.283	2	-0.463	0.63816	0.5576	50
469	ampicillin - MCF7	-0.282	2	-0.462	0.64078	0.7388	50
470	sulfacetamide - PC3	-0.282	2	-0.462	0.64195	0.6742	50
471	mebendazole - PC3	0.137	2	0.46	0.64661	0.7906	50
472	bacitracin - MCF7	-0.278	2	-0.46	0.64822	0.6277	50
473	SC-560 - MCF7	-0.276	2	-0.459	0.6507	0.7348	50
474	primaquine - MCF7	0.17	2	0.458	0.65454	0.845	50
475	vinblastine - MCF7	-0.274	2	-0.458	0.65587	0.6084	50
476	flumequine - MCF7	0.121	2	0.456	0.66009	0.6392	50
477	flunarizine - MCF7	0.136	2	0.454	0.66456	0.7636	50
478	finasteride - PC3	-0.267	2	-0.455	0.66553	0.703	50
479	bretylium tosilate - MCF7	-0.267	2	-0.454	0.66625	0.6839	50
480	dinoprostone - PC3	-0.266	2	-0.454	0.6678	0.7519	50
481	quinisocaine - MCF7	0.167	2	0.453	0.6686	0.7075	50
482	aciclovir - PC3	-0.266	2	-0.453	0.66991	0.6957	50
483	pirlindole - MCF7	-0.265	2	-0.453	0.6707	0.6471	50
484	oxamniquine - MCF7	-0.263	2	-0.452	0.67269	0.6748	50
485	mafenide - MCF7	-0.262	2	-0.452	0.67444	0.741	50
486	BCB000040 - PC3	-0.262	2	-0.452	0.6749	0.6867	50
487	lysergol - MCF7	0.165	2	0.451	0.67611	0.5625	50
488	corticosterone - MCF7	-0.106	2	-0.451	0.67691	0.6165	50
489	estradiol - ssMCF7	-0.202	2	-0.451	0.67734	0.7219	50
490	tolazoline - MCF7	-0.261	2	-0.451	0.67734	0.6291	50
491	dipyridamole - PC3	0.113	2	0.45	0.67933	0.5259	50
492	fursultiamine - MCF7	-0.26	2	-0.45	0.68162	0.7233	50
493	moxisylyte - PC3	0.162	2	0.447	0.68786	0.7296	50
494	cisapride - MCF7	0.126	2	0.446	0.69293	0.6805	50
495	sertaconazole - MCF7	0.146	2	0.445	0.69394	0.7765	50
496	ethoxyquin - PC3	-0.23	2	-0.443	0.70377	0.651	50
497	terazosin - MCF7	-0.244	2	-0.442	0.70416	0.7815	50
498	dexamethasone - PC3	-0.244	2	-0.442	0.70466	0.803	50
499	bromocriptine - MCF7	0.126	2	0.442	0.70496	0.7303	50
500	calcium folinate - PC3	-0.243	2	-0.442	0.7051	0.6867	50
501	pindolol - PC3	-0.242	2	-0.442	0.70615	0.6129	50
502	PHA-00767505E - PC3	-0.123	2	-0.441	0.70736	0.6934	50
503	dehydrocholic acid - PC3	-0.241	2	-0.441	0.70891	0.659	50
504	benzonatate - MCF7	0.157	2	0.441	0.70899	0.6387	50
505	fludrocortisone - PC3	-0.24	2	-0.44	0.70979	0.7284	50
506	mestranol - MCF7	0.157	2	0.44	0.71152	0.7472	50
507	mefexamide - MCF7	-0.233	2	-0.438	0.71818	0.6424	50
508	amikacin - MCF7	0.11	2	0.437	0.71896	0.4516	50
509	sulfadimidine - PC3	-0.229	2	-0.435	0.72432	0.7368	50
510	josamycin - PC3	-0.223	2	-0.434	0.72715	0.6928	50
511	semustine - MCF7	0.122	2	0.434	0.72742	0.7684	50
512	sulfadimethoxine - PC3	-0.225	2	-0.434	0.72903	0.6286	50
513	prednisone - PC3	-0.224	2	-0.433	0.73053	0.638	50
514	proglumide - MCF7	0.153	2	0.433	0.73063	0.6585	50
515	vancomycin - MCF7	-0.224	2	-0.433	0.73132	0.7831	50
516	rotenone - MCF7	0.111	2	0.433	0.73156	0.8	50
517	antazoline - MCF7	0.133	2	0.432	0.73468	0.7938	50
518	metrifonate - MCF7	0.152	2	0.432	0.73468	0.7068	50
519	IC-86621 - MCF7	0.109	2	0.432	0.7351	0.7397	50
520	diphenylpyraline - PC3	-0.209	2	-0.428	0.74418	0.5625	50
521	nitrofurantoin - MCF7	0.115	2	0.425	0.75538	0.7584	50
522	thioproperazine - PC3	-0.199	2	-0.424	0.75665	0.6867	50
523	aztreonam - MCF7	0.103	2	0.424	0.75764	0.7433	50
524	tetramisole - MCF7	0.146	2	0.423	0.76083	0.6644	50
525	mifepristone - MCF7	0.146	2	0.422	0.76234	0.7025	50
526	albendazole - MCF7	0.145	2	0.421	0.76637	0.8129	50
527	lomustine - PC3	0.145	2	0.421	0.76677	0.8093	50
528	etomidate - MCF7	0.142	2	0.417	0.77852	0.776	50
529	Prestwick-920 - MCF7	0.141	2	0.416	0.78059	0.7853	50
530	SR-95639A - MCF7	0.141	2	0.415	0.78256	0.75	50
531	piperine - MCF7	0.141	2	0.415	0.78303	0.6286	50
532	bromperidol - MCF7	0.139	2	0.412	0.79033	0.8217	50
533	rescinnamine - MCF7	0.139	2	0.412	0.79138	0.8444	50
534	bufexamac - MCF7	0.139	2	0.411	0.79222	0.84	50
535	oxaprozin - PC3	0.118	2	0.411	0.79246	0.7925	50
536	novobiocin - PC3	-0.031	2	-0.411	0.79283	0.7586	50
537	aminophenazone - PC3	0.138	2	0.41	0.7947	0.6603	50
538	berberine - MCF7	0.137	2	0.41	0.7961	0.7938	50
539	meropenem - MCF7	0.136	2	0.408	0.80085	0.7357	50
540	dilazep - MCF7	0.135	2	0.407	0.80403	0.7381	50
541	scoulerine - MCF7	0.135	2	0.407	0.80437	0.8786	50
542	Prestwick-559 - MCF7	0.135	2	0.406	0.80651	0.8592	50
543	theobromine - MCF7	0.135	2	0.406	0.80677	0.8629	50
544	norcyclobenzaprine - MCF7	0.134	2	0.405	0.80888	0.895	50
545	piroxicam - MCF7	0.134	2	0.404	0.80995	0.7206	50
546	cefmetazole - MCF7	0.134	2	0.404	0.81067	0.8994	50
547	nicergoline - MCF7	0.133	2	0.403	0.81166	0.9188	50
548	roxarsone - MCF7	0.133	2	0.403	0.81337	0.8054	50
549	5194442 - PC3	0.112	2	0.402	0.81582	0.8431	50
550	nicardipine - MCF7	0.132	2	0.401	0.8188	0.8535	50
551	tiratricol - MCF7	0.132	2	0.4	0.81995	0.8051	50
552	probenecid - MCF7	0.129	2	0.397	0.82761	0.7771	50
553	riluzole - MCF7	0.129	2	0.397	0.82844	0.7205	50
554	Y-27632 - MCF7	0.129	2	0.396	0.82912	0.8139	50
555	CP-645525-01 - MCF7	0.102	2	0.396	0.83045	0.9126	50
556	chlorphenamine - MCF7	0.128	2	0.394	0.83532	0.8582	50
557	promazine - PC3	0.127	2	0.392	0.83888	0.9031	50
558	metyrapone - MCF7	0.126	2	0.392	0.83938	0.8391	50
559	pirenzepine - PC3	0.119	2	0.389	0.84532	0.8757	50
560	miconazole - PC3	0.123	2	0.386	0.8524	0.8989	50
561	chlorambucil - PC3	0.099	2	0.384	0.8564	0.8108	50
562	mephenesin - PC3	0.122	2	0.384	0.85671	0.8939	50
563	homosalate - PC3	0.12	2	0.382	0.86039	0.8582	50
564	amiloride - PC3	0.119	2	0.38	0.86483	0.8382	50
565	dehydrocholic acid - MCF7	0.118	2	0.376	0.87369	0.8462	50
566	dextromethorphan - MCF7	0.11	2	0.375	0.87518	0.8684	50
567	oleandomycin - MCF7	0.117	2	0.374	0.87783	0.8692	50
568	imidurea - MCF7	0.116	2	0.372	0.88087	0.8797	50
569	sulfinpyrazone - MCF7	0.11	2	0.372	0.88216	0.8394	50
570	pheniramine - PC3	0.093	2	0.368	0.88827	0.8898	50
571	isoxicam - MCF7	0.113	2	0.365	0.89409	0.9321	50
572	hecogenin - MCF7	0.112	2	0.365	0.8959	0.8661	50
573	tolbutamide - PC3	0.111	2	0.363	0.89944	0.8571	50
574	sulfamethizole - MCF7	0.111	2	0.361	0.9024	0.8707	50
575	doxylamine - PC3	0.109	2	0.361	0.90306	0.8839	50
576	minoxidil - PC3	0.11	2	0.36	0.90487	0.9124	50
577	loracarbef - MCF7	0.11	2	0.359	0.90594	0.9272	50
578	domperidone - MCF7	0.109	2	0.357	0.90994	0.8168	50
579	4-hydroxyphenazone - MCF7	0.095	2	0.356	0.91143	0.8993	50
580	remoxipride - MCF7	0.107	2	0.355	0.91405	0.8986	50
581	Prestwick-675 - PC3	0.106	2	0.353	0.91656	0.9431	50
582	sulfaguanidine - PC3	0.106	2	0.352	0.91733	0.9298	50
583	ketoprofen - PC3	0.102	2	0.347	0.9261	0.8613	50
584	tremorine - MCF7	0.092	2	0.338	0.93948	0.9127	50
585	griseofulvin - PC3	0.092	2	0.336	0.9432	0.9262	50
586	alpha-ergocryptine - PC3	0.079	2	0.321	0.96117	0.946	50
587	cephaeline - PC3	0.67	1	0.998	---	---	100
588	anisomycin - PC3	0.66	1	0.998	---	---	100
589	cicloheximide - PC3	0.635	1	0.998	---	---	100
590	emetine - PC3	0.623	1	0.997	---	---	100
591	thapsigargin - PC3	0.618	1	0.997	---	---	100
592	anisomycin - HL60	0.612	1	0.997	---	---	100
593	emetine - HL60	0.58	1	0.997	---	---	100
594	lycorine - PC3	0.574	1	0.997	---	---	100
595	alfadolone - MCF7	-0.72	1	-0.996	---	---	100
596	cephaeline - HL60	0.568	1	0.996	---	---	100
597	ouabain - PC3	0.565	1	0.996	---	---	100
598	celastrol - MCF7	0.561	1	0.995	---	---	100
599	strophanthidin - PC3	0.543	1	0.995	---	---	100
600	digoxin - PC3	0.541	1	0.994	---	---	100
601	sulfapyridine - PC3	-0.697	1	-0.994	---	---	100
602	kaempferol - PC3	-0.694	1	-0.993	---	---	100
603	lycorine - HL60	0.528	1	0.993	---	---	100
604	digitoxigenin - PC3	0.491	1	0.991	---	---	100
605	piperlongumine - MCF7	0.466	1	0.99	---	---	100
606	adipiodone - PC3	-0.664	1	-0.989	---	---	100
607	cicloheximide - HL60	0.449	1	0.988	---	---	100
608	MG-262 - MCF7	0.449	1	0.988	---	---	100
609	trifluridine - PC3	-0.657	1	-0.987	---	---	100
610	digoxigenin - PC3	0.433	1	0.987	---	---	100
611	puromycin - PC3	0.425	1	0.985	---	---	100
612	puromycin - HL60	0.424	1	0.985	---	---	100
613	streptozocin - PC3	-0.641	1	-0.984	---	---	100
614	mitoxantrone - PC3	-0.64	1	-0.984	---	---	100
615	spiperone - PC3	0.418	1	0.983	---	---	100
616	epitiostanol - PC3	-0.635	1	-0.983	---	---	100
617	digitoxigenin - HL60	0.416	1	0.983	---	---	100
618	AR-A014418 - MCF7	0.411	1	0.982	---	---	100
619	5109870 - MCF7	0.409	1	0.981	---	---	100
620	8-azaguanine - PC3	0.407	1	0.98	---	---	100
621	streptomycin - PC3	-0.624	1	-0.979	---	---	100
622	lansoprazole - HL60	-0.62	1	-0.979	---	---	100
623	ouabain - HL60	0.4	1	0.979	---	---	100
624	tyrphostin AG-1478 - MCF7	0.391	1	0.978	---	---	100
625	5114445 - MCF7	0.39	1	0.978	---	---	100
626	vidarabine - PC3	-0.612	1	-0.977	---	---	100
627	noretynodrel - PC3	-0.611	1	-0.977	---	---	100
628	pararosaniline - MCF7	0.385	1	0.976	---	---	100
629	MG-132 - MCF7	0.384	1	0.976	---	---	100
630	strophanthidin - HL60	0.381	1	0.975	---	---	100
631	pyrvinium - PC3	0.379	1	0.974	---	---	100
632	lanatoside C - HL60	0.378	1	0.974	---	---	100
633	1,4-chrysenequinone - PC3	0.377	1	0.973	---	---	100
634	alfadolone - PC3	-0.591	1	-0.972	---	---	100
635	mesoridazine - PC3	-0.59	1	-0.972	---	---	100
636	clebopride - PC3	-0.588	1	-0.971	---	---	100
637	6-azathymine - PC3	-0.586	1	-0.97	---	---	100
638	etoposide - HL60	0.366	1	0.969	---	---	100
639	HC toxin - MCF7	0.362	1	0.968	---	---	100
640	suxibuzone - PC3	-0.581	1	-0.968	---	---	100
641	salsolinol - PC3	-0.579	1	-0.968	---	---	100
642	clioquinol - PC3	0.36	1	0.967	---	---	100
643	mecamylamine - PC3	-0.578	1	-0.967	---	---	100
644	bambuterol - PC3	-0.578	1	-0.967	---	---	100
645	benzbromarone - PC3	-0.574	1	-0.964	---	---	100
646	enalapril - PC3	-0.573	1	-0.964	---	---	100
647	quercetin - PC3	-0.571	1	-0.964	---	---	100
648	Prestwick-689 - PC3	-0.57	1	-0.964	---	---	100
649	alprostadil - HL60	0.35	1	0.963	---	---	100
650	hecogenin - PC3	-0.568	1	-0.963	---	---	100
651	metitepine - PC3	-0.567	1	-0.963	---	---	100
652	dexpropranolol - PC3	-0.566	1	-0.963	---	---	100
653	proscillaridin - HL60	0.35	1	0.963	---	---	100
654	5140203 - MCF7	0.349	1	0.963	---	---	100
655	cefalonium - PC3	-0.566	1	-0.963	---	---	100
656	Prestwick-972 - PC3	-0.565	1	-0.962	---	---	100
657	ritodrine - PC3	-0.565	1	-0.962	---	---	100
658	cyclic adenosine monophosphate - PC3	-0.565	1	-0.962	---	---	100
659	helveticoside - HL60	0.347	1	0.962	---	---	100
660	hydroxyachillin - PC3	-0.563	1	-0.961	---	---	100
661	pralidoxime - PC3	-0.563	1	-0.961	---	---	100
662	5213008 - MCF7	0.346	1	0.961	---	---	100
663	isotretinoin - PC3	-0.559	1	-0.96	---	---	100
664	digoxin - HL60	0.344	1	0.959	---	---	100
665	doxycycline - PC3	-0.553	1	-0.959	---	---	100
666	oxybenzone - PC3	-0.552	1	-0.959	---	---	100
667	clotrimazole - PC3	0.343	1	0.959	---	---	100
668	benzydamine - PC3	-0.55	1	-0.958	---	---	100
669	dydrogesterone - PC3	-0.548	1	-0.958	---	---	100
670	oxamniquine - PC3	-0.546	1	-0.957	---	---	100
671	alexidine - MCF7	0.338	1	0.956	---	---	100
672	butyl hydroxybenzoate - HL60	-0.542	1	-0.956	---	---	100
673	harmaline - PC3	-0.541	1	-0.956	---	---	100
674	carteolol - HL60	-0.541	1	-0.955	---	---	100
675	docosahexaenoic acid ethyl ester - MCF7	0.337	1	0.955	---	---	100
676	clomipramine - PC3	0.336	1	0.955	---	---	100
677	amrinone - PC3	-0.537	1	-0.955	---	---	100
678	prednicarbate - PC3	-0.534	1	-0.954	---	---	100
679	phenacetin - HL60	-0.533	1	-0.954	---	---	100
680	menadione - PC3	0.335	1	0.954	---	---	100
681	8-azaguanine - HL60	0.335	1	0.954	---	---	100
682	Prestwick-920 - HL60	-0.532	1	-0.954	---	---	100
683	menadione - HL60	0.334	1	0.953	---	---	100
684	ticarcillin - PC3	-0.531	1	-0.953	---	---	100
685	digoxigenin - HL60	0.332	1	0.952	---	---	100
686	pramocaine - PC3	-0.525	1	-0.952	---	---	100
687	phenoxybenzamine - PC3	0.331	1	0.952	---	---	100
688	gossypol - HL60	0.331	1	0.952	---	---	100
689	seneciphylline - PC3	-0.524	1	-0.952	---	---	100
690	chloropyramine - PC3	0.33	1	0.951	---	---	100
691	imatinib - MCF7	-0.522	1	-0.951	---	---	100
692	phenazone - PC3	-0.522	1	-0.951	---	---	100
693	phensuximide - PC3	-0.521	1	-0.95	---	---	100
694	fluticasone - PC3	-0.52	1	-0.949	---	---	100
695	pyrazinamide - PC3	-0.52	1	-0.949	---	---	100
696	pizotifen - PC3	0.327	1	0.949	---	---	100
697	ioversol - PC3	-0.517	1	-0.949	---	---	100
698	pseudopelletierine - PC3	-0.515	1	-0.948	---	---	100
699	STOCK1N-35696 - MCF7	0.324	1	0.948	---	---	100
700	sulfadoxine - PC3	-0.511	1	-0.948	---	---	100
701	spectinomycin - PC3	-0.51	1	-0.947	---	---	100
702	epiandrosterone - PC3	-0.507	1	-0.947	---	---	100
703	bisacodyl - PC3	0.323	1	0.947	---	---	100
704	naringenin - PC3	-0.507	1	-0.947	---	---	100
705	hydralazine - HL60	-0.505	1	-0.946	---	---	100
706	parthenolide - PC3	0.321	1	0.946	---	---	100
707	butacaine - HL60	-0.501	1	-0.946	---	---	100
708	orciprenaline - PC3	-0.5	1	-0.946	---	---	100
709	N-acetylmuramic acid - PC3	-0.499	1	-0.946	---	---	100
710	deptropine - PC3	0.32	1	0.946	---	---	100
711	corynanthine - PC3	-0.499	1	-0.945	---	---	100
712	melatonin - HL60	-0.498	1	-0.945	---	---	100
713	N6-methyladenosine - PC3	-0.498	1	-0.945	---	---	100
714	nafcillin - PC3	-0.498	1	-0.945	---	---	100
715	moxisylyte - HL60	-0.498	1	-0.945	---	---	100
716	danazol - PC3	-0.497	1	-0.945	---	---	100
717	glycocholic acid - PC3	-0.496	1	-0.944	---	---	100
718	yohimbic acid - HL60	-0.496	1	-0.944	---	---	100
719	iopamidol - PC3	-0.495	1	-0.944	---	---	100
720	phensuximide - HL60	-0.495	1	-0.944	---	---	100
721	bezafibrate - PC3	-0.493	1	-0.943	---	---	100
722	flurbiprofen - HL60	-0.493	1	-0.943	---	---	100
723	ondansetron - PC3	-0.493	1	-0.943	---	---	100
724	probenecid - HL60	-0.489	1	-0.943	---	---	100
725	pilocarpine - PC3	-0.489	1	-0.943	---	---	100
726	Prestwick-1103 - HL60	-0.486	1	-0.942	---	---	100
727	securinine - PC3	0.316	1	0.942	---	---	100
728	PHA-00846566E - MCF7	0.316	1	0.941	---	---	100
729	vigabatrin - PC3	-0.484	1	-0.941	---	---	100
730	corticosterone - PC3	-0.484	1	-0.941	---	---	100
731	cyproterone - HL60	-0.483	1	-0.941	---	---	100
732	idazoxan - HL60	-0.482	1	-0.94	---	---	100
733	alclometasone - PC3	-0.48	1	-0.94	---	---	100
734	dioxybenzone - PC3	-0.475	1	-0.939	---	---	100
735	hexylcaine - HL60	-0.473	1	-0.939	---	---	100
736	loracarbef - HL60	-0.473	1	-0.939	---	---	100
737	calcium pantothenate - PC3	-0.472	1	-0.939	---	---	100
738	metrizamide - HL60	-0.471	1	-0.938	---	---	100
739	heptaminol - HL60	-0.471	1	-0.938	---	---	100
740	tamoxifen - HL60	-0.467	1	-0.938	---	---	100
741	tomatidine - PC3	-0.466	1	-0.937	---	---	100
742	sulfamerazine - HL60	-0.465	1	-0.937	---	---	100
743	diethylstilbestrol - HL60	-0.464	1	-0.937	---	---	100
744	iopamidol - HL60	-0.463	1	-0.937	---	---	100
745	caffeic acid - PC3	-0.461	1	-0.936	---	---	100
746	bergenin - PC3	-0.458	1	-0.936	---	---	100
747	fluoxetine - PC3	-0.457	1	-0.935	---	---	100
748	pyridoxine - HL60	-0.456	1	-0.935	---	---	100
749	benzthiazide - PC3	-0.456	1	-0.934	---	---	100
750	desoxycortone - PC3	-0.453	1	-0.934	---	---	100
751	niclosamide - HL60	0.307	1	0.934	---	---	100
752	tropine - PC3	-0.452	1	-0.934	---	---	100
753	isoxicam - HL60	-0.449	1	-0.934	---	---	100
754	pyrvinium - HL60	0.305	1	0.933	---	---	100
755	5151277 - MCF7	0.305	1	0.933	---	---	100
756	idazoxan - PC3	-0.441	1	-0.933	---	---	100
757	succinylsulfathiazole - PC3	-0.441	1	-0.932	---	---	100
758	azapropazone - HL60	-0.44	1	-0.932	---	---	100
759	orphenadrine - HL60	-0.439	1	-0.932	---	---	100
760	theobromine - HL60	-0.439	1	-0.932	---	---	100
761	gabapentin - HL60	-0.437	1	-0.932	---	---	100
762	etifenin - HL60	-0.437	1	-0.931	---	---	100
763	propranolol - PC3	-0.434	1	-0.931	---	---	100
764	trapidil - HL60	-0.434	1	-0.931	---	---	100
765	dienestrol - PC3	-0.433	1	-0.931	---	---	100
766	biotin - PC3	-0.433	1	-0.931	---	---	100
767	tiaprofenic acid - HL60	-0.432	1	-0.931	---	---	100
768	serotonin - PC3	-0.431	1	-0.93	---	---	100
769	etiocholanolone - HL60	-0.429	1	-0.93	---	---	100
770	trimethoprim - HL60	-0.429	1	-0.93	---	---	100
771	betamethasone - PC3	-0.426	1	-0.93	---	---	100
772	3-acetamidocoumarin - HL60	-0.425	1	-0.929	---	---	100
773	ciclopirox - HL60	0.301	1	0.929	---	---	100
774	tonzonium bromide - PC3	0.3	1	0.929	---	---	100
775	pridinol - HL60	-0.418	1	-0.929	---	---	100
776	cefadroxil - HL60	-0.409	1	-0.928	---	---	100
777	fenbufen - HL60	-0.409	1	-0.927	---	---	100
778	flucytosine - HL60	-0.409	1	-0.927	---	---	100
779	gramine - HL60	-0.409	1	-0.927	---	---	100
780	podophyllotoxin - HL60	0.297	1	0.927	---	---	100
781	bacitracin - HL60	-0.408	1	-0.927	---	---	100
782	bicuculline - HL60	-0.407	1	-0.927	---	---	100
783	Prestwick-642 - HL60	-0.406	1	-0.926	---	---	100
784	meptazinol - PC3	-0.405	1	-0.926	---	---	100
785	U0125 - PC3	-0.405	1	-0.926	---	---	100
786	isoniazid - HL60	-0.405	1	-0.926	---	---	100
787	amikacin - HL60	-0.404	1	-0.926	---	---	100
788	artemisinin - HL60	-0.403	1	-0.925	---	---	100
789	gibberellic acid - PC3	-0.403	1	-0.925	---	---	100
790	pyrimethamine - HL60	-0.402	1	-0.925	---	---	100
791	amiprilose - HL60	-0.402	1	-0.925	---	---	100
792	prenylamine - PC3	0.294	1	0.925	---	---	100
793	amoxicillin - HL60	-0.401	1	-0.925	---	---	100
794	propranolol - HL60	-0.4	1	-0.924	---	---	100
795	pheniramine - HL60	-0.396	1	-0.924	---	---	100
796	indapamide - HL60	-0.395	1	-0.924	---	---	100
797	sanguinarine - HL60	0.294	1	0.924	---	---	100
798	gabexate - PC3	-0.393	1	-0.924	---	---	100
799	conessine - PC3	-0.392	1	-0.923	---	---	100
800	myosmine - HL60	-0.391	1	-0.923	---	---	100
801	tioguanine - MCF7	-0.391	1	-0.923	---	---	100
802	ribavirin - HL60	-0.386	1	-0.923	---	---	100
803	proadifen - HL60	-0.385	1	-0.923	---	---	100
804	5286656 - MCF7	0.292	1	0.922	---	---	100
805	sulfaguanidine - HL60	-0.379	1	-0.922	---	---	100
806	homochlorcyclizine - PC3	0.291	1	0.922	---	---	100
807	triflupromazine - HL60	-0.378	1	-0.922	---	---	100
808	dydrogesterone - HL60	-0.378	1	-0.921	---	---	100
809	dorzolamide - HL60	-0.378	1	-0.921	---	---	100
810	gabexate - HL60	-0.377	1	-0.921	---	---	100
811	rifampicin - HL60	-0.377	1	-0.921	---	---	100
812	pregnenolone - HL60	-0.373	1	-0.921	---	---	100
813	benperidol - HL60	-0.372	1	-0.92	---	---	100
814	tolnaftate - HL60	-0.371	1	-0.92	---	---	100
815	isoconazole - HL60	-0.371	1	-0.92	---	---	100
816	proglumide - HL60	-0.367	1	-0.92	---	---	100
817	lincomycin - HL60	-0.367	1	-0.92	---	---	100
818	(+/-)-catechin - PC3	-0.366	1	-0.919	---	---	100
819	sulfamethoxazole - HL60	-0.366	1	-0.919	---	---	100
820	enalapril - HL60	-0.366	1	-0.919	---	---	100
821	sertaconazole - HL60	-0.365	1	-0.919	---	---	100
822	indoprofen - HL60	-0.362	1	-0.919	---	---	100
823	azlocillin - HL60	-0.361	1	-0.919	---	---	100
824	ethisterone - HL60	-0.357	1	-0.918	---	---	100
825	lovastatin - HL60	-0.356	1	-0.918	---	---	100
826	thioperamide - HL60	-0.356	1	-0.918	---	---	100
827	ketoprofen - HL60	-0.355	1	-0.918	---	---	100
828	amantadine - PC3	-0.353	1	-0.917	---	---	100
829	cefepime - HL60	-0.352	1	-0.917	---	---	100
830	diflunisal - HL60	-0.351	1	-0.917	---	---	100
831	AG-028671 - MCF7	0.284	1	0.917	---	---	100
832	cefsulodin - HL60	-0.348	1	-0.917	---	---	100
833	daunorubicin - PC3	0.283	1	0.916	---	---	100
834	nefopam - HL60	-0.347	1	-0.916	---	---	100
835	iopromide - HL60	-0.347	1	-0.916	---	---	100
836	butein - PC3	-0.345	1	-0.916	---	---	100
837	mebendazole - HL60	0.281	1	0.916	---	---	100
838	mepenzolate bromide - HL60	-0.343	1	-0.916	---	---	100
839	apomorphine - HL60	-0.341	1	-0.915	---	---	100
840	clemizole - HL60	-0.341	1	-0.915	---	---	100
841	tiapride - HL60	-0.337	1	-0.915	---	---	100
842	colchicine - HL60	0.281	1	0.915	---	---	100
843	harmol - HL60	-0.336	1	-0.915	---	---	100
844	etodolac - HL60	-0.332	1	-0.915	---	---	100
845	mepacrine - MCF7	0.28	1	0.914	---	---	100
846	lomefloxacin - HL60	-0.328	1	-0.914	---	---	100
847	quinpirole - HL60	0.28	1	0.914	---	---	100
848	glycocholic acid - HL60	-0.32	1	-0.914	---	---	100
849	suloctidil - HL60	0.28	1	0.914	---	---	100
850	ticlopidine - HL60	-0.318	1	-0.914	---	---	100
851	budesonide - HL60	-0.317	1	-0.913	---	---	100
852	metampicillin - HL60	-0.315	1	-0.913	---	---	100
853	rifabutin - PC3	0.279	1	0.913	---	---	100
854	abamectin - HL60	-0.313	1	-0.913	---	---	100
855	vincamine - HL60	-0.313	1	-0.913	---	---	100
856	mepyramine - PC3	0.279	1	0.912	---	---	100
857	propoxycaine - HL60	-0.312	1	-0.912	---	---	100
858	suprofen - HL60	-0.306	1	-0.912	---	---	100
859	midodrine - HL60	-0.304	1	-0.912	---	---	100
860	captopril - HL60	-0.298	1	-0.912	---	---	100
861	sulpiride - HL60	-0.294	1	-0.911	---	---	100
862	miconazole - HL60	-0.292	1	-0.911	---	---	100
863	oxybutynin - HL60	-0.286	1	-0.911	---	---	100
864	Prestwick-857 - HL60	-0.281	1	-0.911	---	---	100
865	pimozide - PC3	0.276	1	0.911	---	---	100
866	primaquine - PC3	0.276	1	0.911	---	---	100
867	oxolamine - HL60	-0.276	1	-0.91	---	---	100
868	lynestrenol - HL60	-0.263	1	-0.91	---	---	100
869	chlorhexidine - HL60	-0.261	1	-0.91	---	---	100
870	diphemanil metilsulfate - HL60	-0.261	1	-0.91	---	---	100
871	tiratricol - HL60	-0.254	1	-0.91	---	---	100
872	paclitaxel - HL60	-0.251	1	-0.91	---	---	100
873	hemicholinium - HL60	-0.246	1	-0.909	---	---	100
874	cotinine - HL60	-0.23	1	-0.909	---	---	100
875	metronidazole - HL60	-0.219	1	-0.909	---	---	100
876	triprolidine - PC3	0.273	1	0.909	---	---	100
877	doxorubicin - PC3	0	1	-0.908	---	---	0
878	H-7 - MCF7	0	2	-0.908	---	---	0
879	Prestwick-642 - PC3	0.272	1	0.907	---	---	100
880	apigenin - PC3	0	1	-0.907	---	---	0
881	naftopidil - MCF7	0.271	1	0.907	---	---	100
882	sulfaphenazole - PC3	0	1	-0.907	---	---	0
883	H-7 - PC3	0	2	-0.906	---	---	0
884	metixene - PC3	0.269	1	0.905	---	---	100
885	luteolin - PC3	0	1	-0.905	---	---	0
886	ginkgolide A - MCF7	0	2	-0.904	---	---	0
887	5162773 - MCF7	0.266	1	0.903	---	---	100
888	minocycline - HL60	0.266	1	0.902	---	---	100
889	suloctidil - PC3	0.264	1	0.901	---	---	100
890	trichostatin A - ssMCF7	0.264	1	0.9	---	---	100
891	alimemazine - PC3	0.262	1	0.899	---	---	100
892	zomepirac - PC3	0	1	-0.899	---	---	0
893	gliclazide - PC3	0	1	-0.899	---	---	0
894	pergolide - HL60	0.261	1	0.899	---	---	100
895	benfotiamine - PC3	0	1	-0.899	---	---	0
896	chlorprothixene - PC3	0.261	1	0.899	---	---	100
897	(-)-isoprenaline - HL60	0.26	1	0.898	---	---	100
898	fenbendazole - MCF7	0.26	1	0.898	---	---	100
899	BAS-012416453 - PC3	0	1	-0.898	---	---	0
900	mevalolactone - MCF7	0.259	1	0.897	---	---	100
901	LY-294002 - ssMCF7	0.258	1	0.897	---	---	100
902	GW-8510 - PC3	0	2	-0.896	---	---	0
903	etidronic acid - PC3	0	1	-0.896	---	---	0
904	methylergometrine - HL60	0.257	1	0.896	---	---	100
905	clonidine - HL60	0.257	1	0.895	---	---	100
906	lansoprazole - PC3	0	1	-0.895	---	---	0
907	PHA-00665752 - MCF7	0.257	1	0.895	---	---	100
908	(-)-catechin - MCF7	0.254	1	0.893	---	---	100
909	trimipramine - PC3	0.253	1	0.892	---	---	100
910	adrenosterone - PC3	0	1	-0.891	---	---	0
911	ethosuximide - MCF7	0.251	1	0.891	---	---	100
912	glafenine - PC3	0.251	1	0.89	---	---	100
913	pentetrazol - PC3	0	1	-0.89	---	---	0
914	cycloserine - PC3	0.251	1	0.89	---	---	100
915	pivampicillin - PC3	0	1	-0.889	---	---	0
916	co-dergocrine mesilate - HL60	0.25	1	0.889	---	---	100
917	demecarium bromide - PC3	0.249	1	0.889	---	---	100
918	acetohexamide - PC3	0	1	-0.889	---	---	0
919	diperodon - MCF7	0.249	1	0.888	---	---	100
920	acetylsalicylsalicylic acid - PC3	0	1	-0.888	---	---	0
921	terfenadine - HL60	0.247	1	0.887	---	---	100
922	0297417-0002B - PC3	0.246	1	0.886	---	---	100
923	cytochalasin B - MCF7	0.245	1	0.886	---	---	100
924	naftidrofuryl - PC3	0	1	-0.886	---	---	0
925	salbutamol - HL60	0.245	1	0.886	---	---	100
926	dihydroergocristine - HL60	0.245	1	0.885	---	---	100
927	isometheptene - PC3	0.244	1	0.884	---	---	100
928	fenoprofen - PC3	0	2	-0.883	---	---	0
929	thiostrepton - PC3	0.242	1	0.883	---	---	100
930	citiolone - PC3	0	2	-0.883	---	---	0
931	isotretinoin - HL60	0.241	1	0.882	---	---	100
932	zoxazolamine - PC3	0	1	-0.882	---	---	0
933	syrosingopine - PC3	0.24	1	0.881	---	---	100
934	apramycin - HL60	0	1	-0.881	---	---	0
935	ioxaglic acid - HL60	0	1	-0.881	---	---	0
936	proadifen - PC3	0.239	1	0.881	---	---	100
937	oxamniquine - HL60	0	1	-0.88	---	---	0
938	bemegride - PC3	0	1	-0.88	---	---	0
939	metamizole sodium - PC3	0	2	-0.88	---	---	0
940	chlorphenamine - PC3	0	1	-0.879	---	---	0
941	etacrynic acid - HL60	0.237	1	0.879	---	---	100
942	scopoletin - HL60	0	1	-0.878	---	---	0
943	cantharidin - HL60	0.237	1	0.878	---	---	100
944	1,4-chrysenequinone - HL60	0.237	1	0.878	---	---	100
945	roxarsone - HL60	0	1	-0.878	---	---	0
946	mometasone - PC3	0.237	1	0.878	---	---	100
947	boldine - PC3	0.237	1	0.878	---	---	100
948	ozagrel - PC3	0	1	-0.877	---	---	0
949	tetryzoline - HL60	0.236	1	0.877	---	---	100
950	Prestwick-983 - HL60	0.236	1	0.877	---	---	100
951	dyclonine - PC3	0.236	1	0.877	---	---	100
952	neostigmine bromide - PC3	0	1	-0.877	---	---	0
953	mitoxantrone - MCF7	0	2	-0.876	---	---	0
954	lasalocid - HL60	0.235	1	0.876	---	---	100
955	acepromazine - PC3	0.235	1	0.876	---	---	100
956	galantamine - MCF7	0	2	-0.876	---	---	0
957	STOCK1N-35696 - PC3	0.235	1	0.875	---	---	100
958	azacitidine - PC3	0.235	1	0.875	---	---	100
959	talampicillin - HL60	0	1	-0.875	---	---	0
960	dinoprost - PC3	0.235	1	0.875	---	---	100
961	profenamine - PC3	0.235	1	0.875	---	---	100
962	fenoterol - HL60	0.234	1	0.875	---	---	100
963	(+)-isoprenaline - HL60	0.234	1	0.874	---	---	100
964	ebselen - PC3	0.234	1	0.874	---	---	100
965	sirolimus - ssMCF7	0.233	1	0.874	---	---	100
966	CP-645525-01 - PC3	0.233	1	0.873	---	---	100
967	sulfamethoxypyridazine - PC3	0	1	-0.873	---	---	0
968	bromocriptine - HL60	0.232	1	0.873	---	---	100
969	nicardipine - PC3	0	1	-0.873	---	---	0
970	perhexiline - HL60	0.231	1	0.872	---	---	100
971	camptothecin - PC3	0	1	-0.872	---	---	0
972	seneciphylline - MCF7	0	2	-0.871	---	---	0
973	betazole - HL60	0.23	1	0.871	---	---	100
974	Trolox C - PC3	0.23	1	0.871	---	---	100
975	levamisole - PC3	0	1	-0.87	---	---	0
976	protoveratrine A - MCF7	0	2	-0.87	---	---	0
977	dinoprost - HL60	0.23	1	0.87	---	---	100
978	camptothecin - MCF7	0	2	-0.87	---	---	0
979	protriptyline - PC3	0.228	1	0.869	---	---	100
980	piromidic acid - MCF7	0	2	-0.869	---	---	0
981	famprofazone - PC3	0	2	-0.869	---	---	0
982	medrysone - PC3	0	2	-0.869	---	---	0
983	Prestwick-675 - MCF7	0.228	1	0.868	---	---	100
984	2-deoxy-D-glucose - MCF7	0.227	1	0.868	---	---	100
985	lymecycline - PC3	0	1	-0.868	---	---	0
986	alsterpaullone - MCF7	0	1	-0.868	---	---	0
987	3-acetylcoumarin - MCF7	-0.185	3	-0.868	---	---	33
988	fenbufen - PC3	0	2	-0.867	---	---	0
989	droperidol - HL60	0.227	1	0.867	---	---	100
990	etofenamate - HL60	0	1	-0.867	---	---	0
991	lorglumide - HL60	0	1	-0.867	---	---	0
992	raloxifene - PC3	0.226	1	0.867	---	---	100
993	etacrynic acid - MCF7	0.226	1	0.867	---	---	100
994	ronidazole - MCF7	0	1	-0.866	---	---	0
995	theophylline - MCF7	0	2	-0.866	---	---	0
996	Prestwick-682 - PC3	0.226	1	0.866	---	---	100
997	ascorbic acid - PC3	0	1	-0.866	---	---	0
998	fendiline - HL60	0.226	1	0.866	---	---	100
999	aminophylline - PC3	0	1	-0.866	---	---	0
1000	amrinone - HL60	0	1	-0.866	---	---	0
1001	Prestwick-685 - PC3	0	2	-0.865	---	---	0
1002	Prestwick-972 - MCF7	0	1	-0.865	---	---	0
1003	epivincamine - PC3	0.224	1	0.864	---	---	100
1004	ribostamycin - PC3	0	1	-0.863	---	---	0
1005	(+)-chelidonine - HL60	0.223	1	0.863	---	---	100
1006	cefotetan - MCF7	0.223	1	0.863	---	---	100
1007	tranylcypromine - PC3	0	2	-0.863	---	---	0
1008	propylthiouracil - MCF7	0	2	-0.863	---	---	0
1009	ethoxyquin - HL60	0.222	1	0.862	---	---	100
1010	amphotericin B - PC3	0.221	1	0.861	---	---	100
1011	isoetarine - HL60	0.221	1	0.861	---	---	100
1012	atovaquone - MCF7	0	1	-0.861	---	---	0
1013	liothyronine - PC3	0.221	1	0.861	---	---	100
1014	phthalylsulfathiazole - PC3	0	1	-0.86	---	---	0
1015	pargyline - PC3	0.221	1	0.86	---	---	100
1016	apigenin - MCF7	0	2	-0.86	---	---	0
1017	piribedil - PC3	0	1	-0.86	---	---	0
1018	piracetam - PC3	0	1	-0.859	---	---	0
1019	GW-8510 - MCF7	0	2	-0.859	---	---	0
1020	sotalol - HL60	0	1	-0.859	---	---	0
1021	luteolin - MCF7	0	2	-0.859	---	---	0
1022	chlorprothixene - HL60	0.219	1	0.858	---	---	100
1023	etamsylate - HL60	0	1	-0.858	---	---	0
1024	memantine - HL60	0	1	-0.857	---	---	0
1025	orciprenaline - HL60	0.219	1	0.857	---	---	100
1026	metyrapone - PC3	0	1	-0.857	---	---	0
1027	benfluorex - PC3	0.218	1	0.856	---	---	100
1028	butyl hydroxybenzoate - PC3	0	1	-0.856	---	---	0
1029	cycloserine - MCF7	0	2	-0.856	---	---	0
1030	bumetanide - PC3	0.217	1	0.856	---	---	100
1031	ampicillin - PC3	0	1	-0.856	---	---	0
1032	dipivefrine - HL60	0.216	1	0.856	---	---	100
1033	resveratrol - HL60	0.216	1	0.855	---	---	100
1034	spiperone - HL60	0.216	1	0.855	---	---	100
1035	stachydrine - PC3	0	1	-0.855	---	---	0
1036	metamizole sodium - MCF7	-0.237	3	-0.855	---	---	33
1037	lumicolchicine - MCF7	0	1	-0.855	---	---	0
1038	quinisocaine - HL60	0.215	1	0.854	---	---	100
1039	labetalol - HL60	0.214	1	0.854	---	---	100
1040	paracetamol - PC3	0	1	-0.854	---	---	0
1041	bepridil - HL60	0.214	1	0.854	---	---	100
1042	amoxicillin - PC3	0	1	-0.854	---	---	0
1043	sulfapyridine - HL60	0.213	1	0.854	---	---	100
1044	methazolamide - PC3	0.213	1	0.853	---	---	100
1045	mephentermine - HL60	0.213	1	0.853	---	---	100
1046	bacampicillin - HL60	0.212	1	0.853	---	---	100
1047	xylometazoline - PC3	0	1	-0.853	---	---	0
1048	trifluridine - HL60	0.211	1	0.852	---	---	100
1049	procyclidine - MCF7	0	2	-0.852	---	---	0
1050	harmalol - PC3	0.211	1	0.852	---	---	100
1051	enoxacin - PC3	0.21	1	0.852	---	---	100
1052	dextromethorphan - PC3	0	1	-0.851	---	---	0
1053	monobenzone - HL60	0.21	1	0.851	---	---	100
1054	lysergol - HL60	0.209	1	0.851	---	---	100
1055	tracazolate - HL60	0	1	-0.851	---	---	0
1056	hesperidin - PC3	0	1	-0.851	---	---	0
1057	bethanechol - HL60	0	1	-0.85	---	---	0
1058	promethazine - PC3	0.209	1	0.85	---	---	100
1059	oxantel - PC3	0.209	1	0.85	---	---	100
1060	pipemidic acid - HL60	0	1	-0.85	---	---	0
1061	thiocolchicoside - PC3	0	1	-0.85	---	---	0
1062	mepacrine - HL60	0.206	1	0.849	---	---	100
1063	methocarbamol - PC3	0	1	-0.849	---	---	0
1064	dipyridamole - HL60	0.206	1	0.848	---	---	100
1065	melatonin - PC3	0	1	-0.848	---	---	0
1066	dimenhydrinate - PC3	0.205	1	0.848	---	---	100
1067	clenbuterol - HL60	0.205	1	0.848	---	---	100
1068	piroxicam - PC3	0	1	-0.848	---	---	0
1069	hydrocotarnine - PC3	0.205	1	0.848	---	---	100
1070	quinisocaine - PC3	0.205	1	0.848	---	---	100
1071	decamethonium bromide - HL60	0	1	-0.847	---	---	0
1072	nifuroxazide - HL60	0.204	1	0.847	---	---	100
1073	doxazosin - PC3	0	1	-0.847	---	---	0
1074	piperacetazine - PC3	0.204	1	0.847	---	---	100
1075	perhexiline - PC3	0.204	1	0.847	---	---	100
1076	aminohippuric acid - PC3	0	1	-0.847	---	---	0
1077	chrysin - HL60	0	1	-0.847	---	---	0
1078	N-acetyl-L-leucine - HL60	0	1	-0.846	---	---	0
1079	albendazole - HL60	0.203	1	0.846	---	---	100
1080	probucol - PC3	0.203	1	0.846	---	---	100
1081	urapidil - PC3	0.202	1	0.846	---	---	100
1082	chrysin - MCF7	0	2	-0.846	---	---	0
1083	corbadrine - HL60	0.201	1	0.846	---	---	100
1084	maprotiline - PC3	0.201	1	0.845	---	---	100
1085	desipramine - PC3	0.201	1	0.845	---	---	100
1086	dihydroergotamine - HL60	0.201	1	0.845	---	---	100
1087	ketanserin - PC3	0	1	-0.845	---	---	0
1088	clofazimine - HL60	0.2	1	0.844	---	---	100
1089	betahistine - PC3	0.2	1	0.844	---	---	100
1090	etomidate - HL60	0	1	-0.844	---	---	0
1091	oxamic acid - MCF7	0.199	1	0.844	---	---	100
1092	levocabastine - HL60	0	1	-0.844	---	---	0
1093	adenosine phosphate - HL60	0.197	1	0.843	---	---	100
1094	cefixime - PC3	0	1	-0.843	---	---	0
1095	nocodazole - HL60	0.197	1	0.843	---	---	100
1096	mercaptopurine - MCF7	0.197	1	0.843	---	---	100
1097	metitepine - HL60	0.196	1	0.843	---	---	100
1098	chlorpropamide - PC3	0	1	-0.842	---	---	0
1099	cinoxacin - HL60	0	1	-0.842	---	---	0
1100	tribenoside - PC3	0.196	1	0.842	---	---	100
1101	fursultiamine - HL60	0	1	-0.842	---	---	0
1102	proxymetacaine - PC3	0	1	-0.842	---	---	0
1103	molindone - HL60	0	1	-0.841	---	---	0
1104	tamoxifen - ssMCF7	0.194	1	0.841	---	---	100
1105	acetazolamide - HL60	0.194	1	0.841	---	---	100
1106	meglumine - PC3	0	1	-0.841	---	---	0
1107	naftopidil - HL60	0	1	-0.841	---	---	0
1108	exemestane - MCF7	0.194	1	0.841	---	---	100
1109	atropine methonitrate - MCF7	0	1	-0.841	---	---	0
1110	oxyphenbutazone - HL60	0.194	1	0.841	---	---	100
1111	terbutaline - HL60	0.194	1	0.841	---	---	100
1112	nitrendipine - PC3	0	1	-0.84	---	---	0
1113	hesperidin - HL60	0.193	1	0.84	---	---	100
1114	ipratropium bromide - MCF7	0	1	-0.84	---	---	0
1115	protoveratrine A - PC3	0.192	1	0.84	---	---	100
1116	colchicine - SKMEL5	0.192	1	0.84	---	---	100
1117	sitosterol - HL60	0	1	-0.84	---	---	0
1118	piperlongumine - HL60	0.191	1	0.839	---	---	100
1119	staurosporine - SKMEL5	0.191	1	0.839	---	---	100
1120	loxapine - PC3	0.191	1	0.839	---	---	100
1121	aminocaproic acid - MCF7	0	1	-0.839	---	---	0
1122	canavanine - MCF7	0	1	-0.839	---	---	0
1123	enoxacin - MCF7	0	2	-0.839	---	---	0
1124	nizatidine - PC3	0	1	-0.838	---	---	0
1125	norcyclobenzaprine - PC3	0.189	1	0.838	---	---	100
1126	sulfabenzamide - PC3	0.189	1	0.838	---	---	100
1127	benzbromarone - HL60	0.189	1	0.838	---	---	100
1128	Prestwick-1083 - HL60	0	1	-0.838	---	---	0
1129	bisoprolol - PC3	0.189	1	0.838	---	---	100
1130	S-propranolol - HL60	0.187	1	0.837	---	---	100
1131	bacampicillin - PC3	0	1	-0.837	---	---	0
1132	nisoxetine - PC3	0.187	1	0.837	---	---	100
1133	ketorolac - PC3	0	1	-0.837	---	---	0
1134	risperidone - HL60	0	1	-0.837	---	---	0
1135	glafenine - HL60	0.187	1	0.837	---	---	100
1136	antimycin A - HL60	0.186	1	0.836	---	---	100
1137	androsterone - HL60	0.185	1	0.836	---	---	100
1138	troleandomycin - MCF7	0	1	-0.836	---	---	0
1139	gemfibrozil - HL60	0.185	1	0.836	---	---	100
1140	ornidazole - HL60	0.185	1	0.835	---	---	100
1141	furazolidone - PC3	0.184	1	0.835	---	---	100
1142	flunisolide - PC3	0	2	-0.835	---	---	0
1143	clotrimazole - HL60	0.184	1	0.835	---	---	100
1144	piromidic acid - PC3	0.183	1	0.835	---	---	100
1145	HNMPA-(AM)3 - PC3	0.183	1	0.834	---	---	100
1146	oxolamine - PC3	0.181	1	0.833	---	---	100
1147	sulfacetamide - HL60	0.181	1	0.833	---	---	100
1148	cefotaxime - HL60	0.181	1	0.833	---	---	100
1149	lymecycline - HL60	0	1	-0.833	---	---	0
1150	clopamide - PC3	0	1	-0.832	---	---	0
1151	harpagoside - PC3	0.18	1	0.832	---	---	100
1152	quipazine - PC3	0.18	1	0.832	---	---	100
1153	isoetarine - PC3	0	1	-0.832	---	---	0
1154	Prestwick-1084 - HL60	0	1	-0.832	---	---	0
1155	benzethonium chloride - HL60	0.18	1	0.832	---	---	100
1156	moracizine - PC3	0	1	-0.831	---	---	0
1157	pentetrazol - HL60	0.179	1	0.831	---	---	100
1158	naftidrofuryl - HL60	0.179	1	0.831	---	---	100
1159	sulmazole - PC3	0.178	1	0.831	---	---	100
1160	pimethixene - HL60	0.178	1	0.831	---	---	100
1161	flufenamic acid - HL60	0.178	1	0.83	---	---	100
1162	oligomycin - MCF7	0.178	1	0.83	---	---	100
1163	selegiline - MCF7	0	2	-0.83	---	---	0
1164	fenbendazole - HL60	0.178	1	0.83	---	---	100
1165	L-methionine sulfoximine - PC3	0.177	1	0.83	---	---	100
1166	diphenylpyraline - HL60	0.177	1	0.83	---	---	100
1167	pempidine - HL60	0.177	1	0.83	---	---	100
1168	solasodine - PC3	0	2	-0.829	---	---	0
1169	alclometasone - HL60	0.176	1	0.829	---	---	100
1170	meclofenamic acid - HL60	0.176	1	0.829	---	---	100
1171	pronetalol - HL60	0	1	-0.829	---	---	0
1172	retrorsine - HL60	0.174	1	0.829	---	---	100
1173	estrone - HL60	0.173	1	0.828	---	---	100
1174	astemizole - HL60	0.172	1	0.828	---	---	100
1175	fusaric acid - MCF7	0	2	-0.828	---	---	0
1176	rofecoxib - PC3	0.172	1	0.828	---	---	100
1177	iohexol - HL60	0.172	1	0.828	---	---	100
1178	latamoxef - PC3	0	1	-0.828	---	---	0
1179	benzonatate - HL60	0	1	-0.828	---	---	0
1180	harmol - PC3	0	1	-0.828	---	---	0
1181	rimexolone - HL60	0	1	-0.827	---	---	0
1182	parbendazole - MCF7	0	2	-0.827	---	---	0
1183	3-aminobenzamide - MCF7	0.17	1	0.827	---	---	100
1184	cisapride - HL60	0.17	1	0.827	---	---	100
1185	sulconazole - HL60	0	1	-0.827	---	---	0
1186	iopanoic acid - HL60	0	1	-0.826	---	---	0
1187	prenylamine - HL60	0.169	1	0.826	---	---	100
1188	cyproterone - MCF7	0	2	-0.826	---	---	0
1189	metergoline - HL60	0.168	1	0.826	---	---	100
1190	amphotericin B - HL60	0.168	1	0.826	---	---	100
1191	tridihexethyl - PC3	0	1	-0.826	---	---	0
1192	Prestwick-967 - HL60	0	1	-0.826	---	---	0
1193	syrosingopine - HL60	0.167	1	0.826	---	---	100
1194	beta-escin - HL60	0.167	1	0.826	---	---	100
1195	pirlindole - HL60	0.166	1	0.825	---	---	100
1196	phenelzine - HL60	0.166	1	0.825	---	---	100
1197	metyrapone - HL60	0	1	-0.825	---	---	0
1198	cefalonium - HL60	0	1	-0.825	---	---	0
1199	metrifonate - HL60	0.166	1	0.825	---	---	100
1200	5182598 - MCF7	0	2	-0.825	---	---	0
1201	oxolinic acid - HL60	0.165	1	0.825	---	---	100
1202	ronidazole - HL60	0	1	-0.825	---	---	0
1203	ricinine - HL60	0.165	1	0.824	---	---	100
1204	prednisolone - HL60	0.165	1	0.824	---	---	100
1205	sertaconazole - PC3	0	1	-0.824	---	---	0
1206	LY-294002 - SKMEL5	0.164	1	0.824	---	---	100
1207	corynanthine - MCF7	0	2	-0.824	---	---	0
1208	sulconazole - PC3	0	1	-0.823	---	---	0
1209	eucatropine - PC3	0	2	-0.823	---	---	0
1210	Prestwick-860 - PC3	0.163	1	0.823	---	---	100
1211	vanoxerine - HL60	0.163	1	0.823	---	---	100
1212	isocarboxazid - HL60	0.163	1	0.823	---	---	100
1213	carbarsone - MCF7	0	2	-0.823	---	---	0
1214	proxymetacaine - HL60	0.161	1	0.823	---	---	100
1215	terazosin - HL60	0.161	1	0.822	---	---	100
1216	TTNPB - MCF7	0.16	1	0.822	---	---	100
1217	phenazopyridine - HL60	0.159	1	0.822	---	---	100
1218	capsaicin - HL60	0	1	-0.822	---	---	0
1219	cyproheptadine - HL60	0.159	1	0.822	---	---	100
1220	epiandrosterone - HL60	0.158	1	0.821	---	---	100
1221	delsoline - MCF7	0	2	-0.821	---	---	0
1222	loperamide - HL60	0.158	1	0.821	---	---	100
1223	cyanocobalamin - PC3	0	1	-0.821	---	---	0
1224	abamectin - PC3	0	1	-0.821	---	---	0
1225	carcinine - HL60	0.157	1	0.821	---	---	100
1226	scoulerine - HL60	0.156	1	0.82	---	---	100
1227	pseudopelletierine - HL60	0.156	1	0.82	---	---	100
1228	fluvoxamine - HL60	0	1	-0.82	---	---	0
1229	quercetin - HL60	0.156	1	0.82	---	---	100
1230	pempidine - PC3	0	1	-0.82	---	---	0
1231	econazole - HL60	0.155	1	0.82	---	---	100
1232	harman - PC3	0	1	-0.819	---	---	0
1233	ketanserin - HL60	0.155	1	0.819	---	---	100
1234	valproic acid - ssMCF7	0.155	1	0.819	---	---	100
1235	gliclazide - HL60	0.153	1	0.819	---	---	100
1236	pyrantel - HL60	0.153	1	0.819	---	---	100
1237	amantadine - HL60	0.153	1	0.819	---	---	100
1238	droperidol - PC3	0	1	-0.818	---	---	0
1239	clomipramine - HL60	0.152	1	0.818	---	---	100
1240	probucol - HL60	0.152	1	0.818	---	---	100
1241	eldeline - PC3	0	2	-0.818	---	---	0
1242	docosahexaenoic acid ethyl ester - PC3	0.152	1	0.818	---	---	100
1243	meticrane - HL60	0	1	-0.818	---	---	0
1244	maprotiline - HL60	0.151	1	0.818	---	---	100
1245	pivmecillinam - HL60	0	1	-0.818	---	---	0
1246	yohimbic acid - PC3	0.15	1	0.818	---	---	100
1247	butein - MCF7	0.15	1	0.817	---	---	100
1248	urapidil - HL60	0	1	-0.817	---	---	0
1249	sulfacetamide - MCF7	0	1	-0.817	---	---	0
1250	cefoxitin - HL60	0.149	1	0.817	---	---	100
1251	tiabendazole - PC3	0	1	-0.817	---	---	0
1252	iobenguane - HL60	0.149	1	0.816	---	---	100
1253	methylbenzethonium chloride - HL60	0.149	1	0.816	---	---	100
1254	torasemide - HL60	0	1	-0.816	---	---	0
1255	1,5-isoquinolinediol - HL60	0.147	1	0.816	---	---	100
1256	propylthiouracil - PC3	0	1	-0.816	---	---	0
1257	dimenhydrinate - HL60	0.147	1	0.816	---	---	100
1258	rolipram - HL60	0.147	1	0.816	---	---	100
1259	mesoridazine - HL60	0.147	1	0.815	---	---	100
1260	hydrocortisone - MCF7	0	2	-0.815	---	---	0
1261	phenindione - HL60	0.146	1	0.815	---	---	100
1262	dicycloverine - HL60	0.146	1	0.815	---	---	100
1263	oxedrine - HL60	0.145	1	0.815	---	---	100
1264	tolazoline - HL60	0.145	1	0.815	---	---	100
1265	Prestwick-860 - MCF7	0	2	-0.815	---	---	0
1266	nortriptyline - HL60	0.145	1	0.815	---	---	100
1267	dexpropranolol - MCF7	0	1	-0.814	---	---	0
1268	pyrithyldione - HL60	0.145	1	0.814	---	---	100
1269	propantheline bromide - HL60	0.145	1	0.814	---	---	100
1270	tanespimycin - SKMEL5	0.144	1	0.814	---	---	100
1271	latamoxef - HL60	0.144	1	0.814	---	---	100
1272	dopamine - MCF7	0.143	1	0.814	---	---	100
1273	dimethyloxalylglycine - PC3	0.143	1	0.813	---	---	100
1274	cinchocaine - HL60	0.142	1	0.813	---	---	100
1275	Prestwick-559 - HL60	0.142	1	0.813	---	---	100
1276	cyclizine - HL60	0.142	1	0.813	---	---	100
1277	phenformin - HL60	0.141	1	0.813	---	---	100
1278	estriol - HL60	0	1	-0.813	---	---	0
1279	colforsin - HL60	0.141	1	0.812	---	---	100
1280	riluzole - HL60	0.141	1	0.812	---	---	100
1281	spiramycin - HL60	0.141	1	0.812	---	---	100
1282	bucladesine - HL60	0.139	1	0.812	---	---	100
1283	benzthiazide - MCF7	0	2	-0.812	---	---	0
1284	chlormezanone - HL60	0.139	1	0.812	---	---	100
1285	sulfinpyrazone - HL60	0.138	1	0.812	---	---	100
1286	ergocalciferol - PC3	0	1	-0.811	---	---	0
1287	benfotiamine - HL60	0.138	1	0.811	---	---	100
1288	novobiocin - ssMCF7	0.136	1	0.811	---	---	100
1289	mexiletine - HL60	0.136	1	0.81	---	---	100
1290	oxedrine - PC3	0	1	-0.81	---	---	0
1291	baclofen - HL60	0.135	1	0.81	---	---	100
1292	phenacetin - PC3	0	1	-0.81	---	---	0
1293	dexpropranolol - HL60	0	1	-0.81	---	---	0
1294	methylprednisolone - HL60	0.134	1	0.81	---	---	100
1295	diazoxide - HL60	0.134	1	0.81	---	---	100
1296	methoxsalen - PC3	0	1	-0.809	---	---	0
1297	zimeldine - HL60	0.133	1	0.809	---	---	100
1298	delsoline - HL60	0.132	1	0.809	---	---	100
1299	sulfafurazole - HL60	0.132	1	0.809	---	---	100
1300	dexamethasone - HL60	0.131	1	0.809	---	---	100
1301	naphazoline - HL60	0.131	1	0.808	---	---	100
1302	thalidomide - HL60	0.129	1	0.808	---	---	100
1303	harmine - PC3	0	1	-0.808	---	---	0
1304	fluorometholone - PC3	0	1	-0.808	---	---	0
1305	spectinomycin - HL60	0.129	1	0.808	---	---	100
1306	naloxone - HL60	0.128	1	0.808	---	---	100
1307	carbimazole - HL60	0.127	1	0.808	---	---	100
1308	dihydrostreptomycin - HL60	0.127	1	0.808	---	---	100
1309	lobeline - HL60	0.126	1	0.807	---	---	100
1310	milrinone - PC3	0	1	-0.807	---	---	0
1311	oxetacaine - HL60	0.124	1	0.807	---	---	100
1312	amiloride - HL60	0.124	1	0.807	---	---	100
1313	tamoxifen - PC3	0	1	-0.807	---	---	0
1314	betamethasone - MCF7	0	1	-0.807	---	---	0
1315	gefitinib - HL60	0.124	1	0.807	---	---	100
1316	cortisone - HL60	0.124	1	0.807	---	---	100
1317	chlorzoxazone - HL60	0.124	1	0.807	---	---	100
1318	tolfenamic acid - HL60	0.124	1	0.806	---	---	100
1319	etofenamate - PC3	0	1	-0.806	---	---	0
1320	oxymetazoline - HL60	0.123	1	0.806	---	---	100
1321	piroxicam - HL60	0.123	1	0.806	---	---	100
1322	vinpocetine - HL60	0.121	1	0.806	---	---	100
1323	0175029-0000 - PC3	0	4	-0.806	---	---	0
1324	guanethidine - PC3	0	1	-0.806	---	---	0
1325	sodium phenylbutyrate - SKMEL5	0.121	1	0.806	---	---	100
1326	mefexamide - HL60	0.121	1	0.805	---	---	100
1327	vinburnine - HL60	0.121	1	0.805	---	---	100
1328	etynodiol - HL60	0	1	-0.805	---	---	0
1329	praziquantel - HL60	0.117	1	0.805	---	---	100
1330	acetazolamide - MCF7	0	2	-0.805	---	---	0
1331	methapyrilene - HL60	0.117	1	0.805	---	---	100
1332	gibberellic acid - HL60	0	1	-0.805	---	---	0
1333	pirenzepine - HL60	0.116	1	0.805	---	---	100
1334	ambroxol - HL60	0.116	1	0.804	---	---	100
1335	hydrastine hydrochloride - HL60	0.113	1	0.804	---	---	100
1336	josamycin - HL60	0.111	1	0.804	---	---	100
1337	trimetazidine - MCF7	0	2	-0.804	---	---	0
1338	chlortetracycline - HL60	0.11	1	0.804	---	---	100
1339	amoxapine - HL60	0.11	1	0.804	---	---	100
1340	mebeverine - HL60	0.11	1	0.804	---	---	100
1341	famotidine - HL60	0.11	1	0.803	---	---	100
1342	diltiazem - HL60	0.109	1	0.803	---	---	100
1343	troleandomycin - HL60	0.108	1	0.803	---	---	100
1344	Prestwick-1084 - PC3	0	1	-0.803	---	---	0
1345	hesperetin - HL60	0.108	1	0.803	---	---	100
1346	aminohippuric acid - HL60	0	1	-0.802	---	---	0
1347	ciprofloxacin - HL60	0.104	1	0.802	---	---	100
1348	mianserin - HL60	0.103	1	0.802	---	---	100
1349	zidovudine - HL60	0.101	1	0.802	---	---	100
1350	antazoline - HL60	0.099	1	0.802	---	---	100
1351	paromomycin - HL60	0.098	1	0.802	---	---	100
1352	rofecoxib - HL60	0.064	1	0.802	---	---	100
1353	chlorzoxazone - PC3	0	1	-0.801	---	---	0
1354	ganciclovir - PC3	0	1	-0.801	---	---	0
1355	monocrotaline - MCF7	0	2	-0.801	---	---	0
1356	vanoxerine - PC3	0	1	0.801	---	---	0
1357	flucytosine - PC3	0	1	-0.801	---	---	0
1358	trihexyphenidyl - MCF7	0	1	0.801	---	---	0
1359	glibenclamide - MCF7	0	2	-0.801	---	---	0
1360	epitiostanol - HL60	0	1	-0.8	---	---	0
1361	noscapine - PC3	0	1	-0.8	---	---	0
1362	desoxycortone - HL60	0	1	-0.799	---	---	0
1363	rimexolone - PC3	0	1	-0.799	---	---	0
1364	iopanoic acid - PC3	0	1	-0.798	---	---	0
1365	6-azathymine - MCF7	0	2	-0.798	---	---	0
1366	chloramphenicol - HL60	0	1	-0.798	---	---	0
1367	denatonium benzoate - HL60	0	1	-0.798	---	---	0
1368	nalidixic acid - PC3	0	2	-0.797	---	---	0
1369	aminophenazone - MCF7	0	2	-0.797	---	---	0
1370	MS-275 - PC3	0	2	0.796	---	---	0
1371	atropine - MCF7	0	2	-0.796	---	---	0
1372	oxybuprocaine - PC3	0	1	-0.795	---	---	0
1373	difenidol - MCF7	0	2	-0.795	---	---	0
1374	isoflupredone - PC3	0	1	0.795	---	---	0
1375	methyldopate - HL60	0	1	-0.795	---	---	0
1376	BW-B70C - MCF7	0	1	0.793	---	---	0
1377	meclozine - PC3	0	1	-0.793	---	---	0
1378	Prestwick-692 - PC3	0	1	0.792	---	---	0
1379	corbadrine - MCF7	0	2	-0.792	---	---	0
1380	bendroflumethiazide - MCF7	-0.208	3	-0.792	---	---	33
1381	cyproterone - PC3	0	1	-0.792	---	---	0
1382	zuclopenthixol - MCF7	0	2	0.792	---	---	0
1383	betahistine - MCF7	0	2	-0.791	---	---	0
1384	spaglumic acid - HL60	0	1	-0.791	---	---	0
1385	Prestwick-664 - HL60	0	1	-0.791	---	---	0
1386	etidronic acid - MCF7	0	2	-0.79	---	---	0
1387	skimmianine - PC3	0	1	-0.789	---	---	0
1388	caffeic acid - MCF7	0	1	-0.789	---	---	0
1389	piperidolate - HL60	0	1	-0.789	---	---	0
1390	vitexin - MCF7	0	2	-0.788	---	---	0
1391	lasalocid - PC3	0	1	0.788	---	---	0
1392	delsoline - PC3	0	1	-0.788	---	---	0
1393	dobutamine - PC3	0	1	-0.788	---	---	0
1394	moxonidine - HL60	0	1	-0.788	---	---	0
1395	allantoin - HL60	0	1	-0.787	---	---	0
1396	guanfacine - PC3	0	1	-0.787	---	---	0
1397	tiaprofenic acid - PC3	0	1	-0.786	---	---	0
1398	rolitetracycline - MCF7	0	2	-0.786	---	---	0
1399	gliclazide - MCF7	0	2	-0.786	---	---	0
1400	pancuronium bromide - HL60	0	1	-0.785	---	---	0
1401	sulmazole - MCF7	0	1	0.785	---	---	0
1402	ciclosporin - PC3	0	1	0.785	---	---	0
1403	meticrane - PC3	0	2	-0.784	---	---	0
1404	chlorogenic acid - PC3	0	1	0.784	---	---	0
1405	cyclopenthiazide - PC3	0	1	-0.784	---	---	0
1406	trimethylcolchicinic acid - HL60	0	1	0.784	---	---	0
1407	artemisinin - PC3	0	1	-0.783	---	---	0
1408	todralazine - HL60	0	1	-0.783	---	---	0
1409	dioxybenzone - HL60	0	1	-0.783	---	---	0
1410	sulfaphenazole - HL60	0	1	-0.782	---	---	0
1411	clioquinol - HL60	0	1	0.782	---	---	0
1412	morantel - HL60	0	1	-0.782	---	---	0
1413	dicloxacillin - HL60	0	1	-0.781	---	---	0
1414	isradipine - HL60	0	1	-0.781	---	---	0
1415	vinburnine - PC3	0	1	0.781	---	---	0
1416	nadolol - MCF7	0	2	0.781	---	---	0
1417	vinpocetine - MCF7	0	2	-0.78	---	---	0
1418	estriol - PC3	0	1	-0.78	---	---	0
1419	tyloxapol - HL60	0	1	-0.779	---	---	0
1420	etamsylate - PC3	0	1	-0.779	---	---	0
1421	terconazole - PC3	0	1	0.779	---	---	0
1422	(+)-isoprenaline - PC3	0	1	-0.779	---	---	0
1423	imipramine - PC3	0	1	0.779	---	---	0
1424	norfloxacin - PC3	0	2	-0.779	---	---	0
1425	vancomycin - PC3	0	1	0.778	---	---	0
1426	furaltadone - MCF7	-0.22	3	-0.778	---	---	33
1427	metamizole sodium - HL60	0	1	-0.778	---	---	0
1428	trihexyphenidyl - PC3	0	1	0.778	---	---	0
1429	ketanserin - MCF7	0	2	-0.777	---	---	0
1430	cefuroxime - PC3	0	1	-0.777	---	---	0
1431	nadide - PC3	0	1	-0.777	---	---	0
1432	pentamidine - HL60	0	1	-0.777	---	---	0
1433	piperidolate - MCF7	0	2	-0.776	---	---	0
1434	clemizole - PC3	0	2	-0.776	---	---	0
1435	promazine - HL60	0	1	-0.775	---	---	0
1436	meclofenoxate - PC3	0	2	-0.775	---	---	0
1437	5152487 - MCF7	0	1	-0.775	---	---	0
1438	primaquine - HL60	0	1	0.775	---	---	0
1439	pentoxyverine - PC3	0	1	-0.774	---	---	0
1440	mesalazine - HL60	0	1	-0.774	---	---	0
1441	demeclocycline - MCF7	0	3	-0.773	---	---	0
1442	nadolol - PC3	0	1	0.773	---	---	0
1443	thiethylperazine - PC3	0	1	0.773	---	---	0
1444	dipivefrine - PC3	0	1	-0.773	---	---	0
1445	tribenoside - HL60	0	1	0.773	---	---	0
1446	naringin - PC3	0	1	-0.773	---	---	0
1447	phthalylsulfathiazole - MCF7	0	3	-0.773	---	---	0
1448	praziquantel - PC3	0	1	-0.772	---	---	0
1449	guaifenesin - PC3	0	2	-0.772	---	---	0
1450	cinchonine - PC3	0	1	0.772	---	---	0
1451	Prestwick-1084 - MCF7	0	2	-0.771	---	---	0
1452	Prestwick-691 - MCF7	0	2	0.771	---	---	0
1453	benzathine benzylpenicillin - PC3	0	1	0.771	---	---	0
1454	omeprazole - HL60	0	1	-0.771	---	---	0
1455	metacycline - HL60	0	1	-0.771	---	---	0
1456	dacarbazine - MCF7	0	2	-0.771	---	---	0
1457	memantine - PC3	0	1	0.77	---	---	0
1458	tetroquinone - MCF7	0	2	-0.77	---	---	0
1459	oxprenolol - HL60	0	1	-0.77	---	---	0
1460	viomycin - PC3	0	1	0.77	---	---	0
1461	letrozole - HL60	0	1	-0.77	---	---	0
1462	tyloxapol - MCF7	0	2	-0.769	---	---	0
1463	atracurium besilate - PC3	0	1	0.769	---	---	0
1464	dimethadione - PC3	0	1	-0.768	---	---	0
1465	iohexol - PC3	0	1	0.768	---	---	0
1466	myricetin - HL60	0	1	0.768	---	---	0
1467	promethazine - HL60	0	1	-0.768	---	---	0
1468	azapropazone - PC3	0	1	0.768	---	---	0
1469	ranitidine - PC3	0	2	-0.767	---	---	0
1470	lorglumide - PC3	0	1	-0.767	---	---	0
1471	atropine - PC3	0	1	-0.767	---	---	0
1472	econazole - PC3	0	1	0.767	---	---	0
1473	gramine - MCF7	0	2	-0.766	---	---	0
1474	amiprilose - MCF7	0	2	-0.766	---	---	0
1475	clofilium tosylate - PC3	0	1	0.766	---	---	0
1476	mefexamide - PC3	0	1	0.766	---	---	0
1477	fluvoxamine - PC3	0	1	-0.765	---	---	0
1478	scriptaid - MCF7	0	1	0.765	---	---	0
1479	pimethixene - MCF7	0	2	0.765	---	---	0
1480	dihydroergocristine - MCF7	0	2	0.765	---	---	0
1481	tolfenamic acid - MCF7	0	1	-0.765	---	---	0
1482	propoxycaine - PC3	0	1	0.765	---	---	0
1483	bethanechol - PC3	0	1	0.765	---	---	0
1484	monensin - HL60	0	1	0.764	---	---	0
1485	cinchonine - MCF7	0	2	0.764	---	---	0
1486	hydrocotarnine - MCF7	0	2	-0.764	---	---	0
1487	ioversol - MCF7	0	2	-0.764	---	---	0
1488	natamycin - HL60	0	1	-0.764	---	---	0
1489	amprolium - MCF7	0	2	-0.764	---	---	0
1490	cinoxacin - PC3	0	1	-0.763	---	---	0
1491	valdecoxib - MCF7	0	1	-0.763	---	---	0
1492	decitabine - MCF7	0	1	0.763	---	---	0
1493	harmine - MCF7	0	2	-0.762	---	---	0
1494	metitepine - MCF7	0	2	0.762	---	---	0
1495	benzamil - MCF7	0.088	3	0.762	---	---	33
1496	procarbazine - HL60	0	1	0.762	---	---	0
1497	carcinine - MCF7	0	2	-0.762	---	---	0
1498	(-)-atenolol - HL60	0	1	-0.761	---	---	0
1499	isosorbide - PC3	0	1	0.761	---	---	0
1500	N-acetyl-L-aspartic acid - MCF7	0	2	-0.76	---	---	0
1501	yohimbic acid - MCF7	0	1	0.76	---	---	0
1502	yohimbine - PC3	0	1	-0.759	---	---	0
1503	(+)-chelidonine - PC3	0	1	0.759	---	---	0
1504	ifenprodil - PC3	0	1	-0.759	---	---	0
1505	ramifenazone - PC3	0	1	-0.759	---	---	0
1506	betulinic acid - MCF7	0	2	0.759	---	---	0
1507	dequalinium chloride - PC3	0	1	-0.758	---	---	0
1508	iopromide - PC3	0	1	0.758	---	---	0
1509	brinzolamide - PC3	0	1	-0.758	---	---	0
1510	reserpine - MCF7	0	1	-0.758	---	---	0
1511	levobunolol - PC3	0	1	0.758	---	---	0
1512	tiabendazole - MCF7	0	2	-0.758	---	---	0
1513	3-hydroxy-DL-kynurenine - PC3	0	1	0.758	---	---	0
1514	androsterone - PC3	0	1	0.757	---	---	0
1515	Prestwick-665 - PC3	0	2	-0.757	---	---	0
1516	chenodeoxycholic acid - PC3	0	1	0.757	---	---	0
1517	neostigmine bromide - HL60	0	1	-0.757	---	---	0
1518	perphenazine - MCF7	0	2	0.756	---	---	0
1519	bephenium hydroxynaphthoate - MCF7	-0.181	3	-0.756	---	---	33
1520	iocetamic acid - PC3	0	1	0.756	---	---	0
1521	mevalolactone - HL60	0	1	-0.755	---	---	0
1522	tobramycin - HL60	0	1	-0.755	---	---	0
1523	DL-thiorphan - MCF7	0	2	-0.755	---	---	0
1524	carbinoxamine - PC3	0	1	-0.754	---	---	0
1525	adipiodone - MCF7	0	2	-0.754	---	---	0
1526	hexetidine - PC3	0	1	0.754	---	---	0
1527	vidarabine - MCF7	0	2	-0.754	---	---	0
1528	piribedil - HL60	0	1	-0.753	---	---	0
1529	demeclocycline - PC3	0	2	-0.753	---	---	0
1530	sulfametoxydiazine - MCF7	0	2	-0.753	---	---	0
1531	tocainide - HL60	0	1	-0.753	---	---	0
1532	hydroxyachillin - MCF7	0	2	-0.753	---	---	0
1533	methyldopate - PC3	0	1	0.752	---	---	0
1534	ornidazole - PC3	0	2	-0.752	---	---	0
1535	thiocolchicoside - MCF7	0	2	-0.752	---	---	0
1536	chlortalidone - PC3	0	1	0.752	---	---	0
1537	monocrotaline - PC3	0	1	-0.752	---	---	0
1538	5186223 - MCF7	0	1	0.751	---	---	0
1539	alexidine - HL60	0	1	0.751	---	---	0
1540	estrone - PC3	0	1	-0.751	---	---	0
1541	riboflavin - PC3	0	1	-0.75	---	---	0
1542	furaltadone - PC3	0	2	-0.75	---	---	0
1543	levomepromazine - PC3	0	2	0.75	---	---	0
1544	phenindione - PC3	0	1	-0.749	---	---	0
1545	proguanil - HL60	0	1	0.749	---	---	0
1546	rilmenidine - HL60	0	1	0.749	---	---	0
1547	natamycin - PC3	0	1	-0.749	---	---	0
1548	nefopam - PC3	0	1	0.749	---	---	0
1549	aconitine - PC3	0	1	0.749	---	---	0
1550	roxarsone - PC3	0	1	-0.748	---	---	0
1551	zalcitabine - MCF7	0	2	0.748	---	---	0
1552	guanethidine - MCF7	0	1	-0.748	---	---	0
1553	decamethonium bromide - PC3	0	1	-0.747	---	---	0
1554	trimethylcolchicinic acid - MCF7	0	2	-0.747	---	---	0
1555	asiaticoside - PC3	0	1	-0.747	---	---	0
1556	lasalocid - MCF7	0	2	0.746	---	---	0
1557	bemegride - HL60	0	1	-0.746	---	---	0
1558	lisuride - MCF7	0	2	0.746	---	---	0
1559	metampicillin - PC3	0	2	0.746	---	---	0
1560	budesonide - PC3	0	1	-0.746	---	---	0
1561	cyclobenzaprine - PC3	0	1	0.746	---	---	0
1562	domperidone - PC3	0	1	0.745	---	---	0
1563	triflupromazine - PC3	0	1	0.745	---	---	0
1564	ronidazole - PC3	0	1	-0.745	---	---	0
1565	Prestwick-675 - HL60	0	1	-0.744	---	---	0
1566	benzbromarone - MCF7	0	1	0.744	---	---	0
1567	karakoline - HL60	0	1	0.744	---	---	0
1568	tremorine - PC3	0	1	-0.744	---	---	0
1569	lovastatin - MCF7	0	2	0.743	---	---	0
1570	tobramycin - MCF7	0	2	-0.743	---	---	0
1571	diethylcarbamazine - PC3	0	1	-0.743	---	---	0
1572	pheneticillin - PC3	0	1	0.743	---	---	0
1573	norethisterone - PC3	0	1	-0.742	---	---	0
1574	beclometasone - PC3	0	1	0.742	---	---	0
1575	cefalonium - MCF7	0	1	-0.742	---	---	0
1576	acetazolamide - PC3	0	1	0.742	---	---	0
1577	metoprolol - MCF7	0	2	0.742	---	---	0
1578	fenoterol - MCF7	0	1	-0.741	---	---	0
1579	felbinac - PC3	0	1	0.74	---	---	0
1580	remoxipride - PC3	0	1	-0.74	---	---	0
1581	adiphenine - HL60	0	1	0.74	---	---	0
1582	Prestwick-1103 - PC3	0	1	0.74	---	---	0
1583	pridinol - PC3	0	1	-0.739	---	---	0
1584	Gly-His-Lys - MCF7	0	1	0.739	---	---	0
1585	benzathine benzylpenicillin - MCF7	0	2	0.739	---	---	0
1586	fluticasone - MCF7	0	2	0.739	---	---	0
1587	pancuronium bromide - MCF7	0	2	-0.739	---	---	0
1588	amitriptyline - HL60	0	1	0.739	---	---	0
1589	5186324 - MCF7	0	1	0.738	---	---	0
1590	nabumetone - PC3	0	1	-0.738	---	---	0
1591	practolol - PC3	0	1	-0.738	---	---	0
1592	pipenzolate bromide - PC3	0	1	-0.737	---	---	0
1593	clorgiline - PC3	0	1	-0.737	---	---	0
1594	3-nitropropionic acid - MCF7	0	2	-0.737	---	---	0
1595	podophyllotoxin - PC3	0	1	0.737	---	---	0
1596	metaraminol - PC3	0	2	-0.736	---	---	0
1597	ursodeoxycholic acid - HL60	0	1	-0.736	---	---	0
1598	calcium pantothenate - MCF7	0	2	-0.736	---	---	0
1599	amiprilose - PC3	0	1	0.735	---	---	0
1600	mepenzolate bromide - PC3	0	2	-0.735	---	---	0
1601	brompheniramine - PC3	0	1	0.735	---	---	0
1602	procaine - MCF7	0	2	-0.735	---	---	0
1603	hycanthone - PC3	0	1	0.735	---	---	0
1604	tolmetin - PC3	0	1	-0.735	---	---	0
1605	ozagrel - MCF7	0	2	-0.734	---	---	0
1606	alfaxalone - HL60	0	1	-0.734	---	---	0
1607	neomycin - PC3	0	2	-0.734	---	---	0
1608	timolol - PC3	0	1	0.734	---	---	0
1609	benperidol - MCF7	0	2	-0.734	---	---	0
1610	isoxicam - PC3	0	2	0.734	---	---	0
1611	Prestwick-984 - HL60	0	1	0.734	---	---	0
1612	clofazimine - PC3	0	1	0.733	---	---	0
1613	fluocinonide - PC3	0	2	-0.733	---	---	0
1614	testosterone - PC3	0	1	0.733	---	---	0
1615	cetirizine - PC3	0	1	-0.733	---	---	0
1616	ursodeoxycholic acid - PC3	0	1	-0.732	---	---	0
1617	loracarbef - PC3	0	1	-0.732	---	---	0
1618	nomifensine - MCF7	0	2	-0.731	---	---	0
1619	morantel - MCF7	0	2	-0.731	---	---	0
1620	trichostatin A - PC3	0.139	55	0.731	---	---	47
1621	STOCK1N-35215 - MCF7	0	1	-0.73	---	---	0
1622	methyldopate - MCF7	0	2	0.73	---	---	0
1623	seneciphylline - HL60	0	1	0.73	---	---	0
1624	pyrithyldione - PC3	0	1	0.729	---	---	0
1625	sulfabenzamide - MCF7	0	2	-0.729	---	---	0
1626	Prestwick-674 - MCF7	0	3	-0.729	---	---	0
1627	gramine - PC3	0	1	0.729	---	---	0
1628	medrysone - MCF7	0	3	-0.729	---	---	0
1629	nadide - HL60	0	1	0.729	---	---	0
1630	ozagrel - HL60	0	1	0.728	---	---	0
1631	furazolidone - MCF7	0	2	0.728	---	---	0
1632	pipenzolate bromide - HL60	0	1	-0.728	---	---	0
1633	lithocholic acid - HL60	0	1	0.728	---	---	0
1634	3-acetamidocoumarin - PC3	0	1	0.728	---	---	0
1635	selegiline - HL60	0	1	-0.728	---	---	0
1636	repaglinide - PC3	0	1	-0.727	---	---	0
1637	zuclopenthixol - HL60	0	1	-0.727	---	---	0
1638	saquinavir - MCF7	0	2	-0.727	---	---	0
1639	piperine - PC3	0	1	-0.727	---	---	0
1640	tiabendazole - HL60	0	1	-0.726	---	---	0
1641	azlocillin - PC3	0	1	-0.726	---	---	0
1642	bicuculline - MCF7	0	2	-0.725	---	---	0
1643	vinpocetine - PC3	0	1	-0.725	---	---	0
1644	diclofenamide - PC3	0	1	-0.725	---	---	0
1645	naringin - HL60	0	1	-0.725	---	---	0
1646	Prestwick-864 - PC3	0	1	0.724	---	---	0
1647	convolamine - PC3	0	1	-0.724	---	---	0
1648	0225151-0000 - MCF7	0	1	-0.724	---	---	0
1649	mebhydrolin - PC3	0	1	0.724	---	---	0
1650	flunixin - PC3	0	2	-0.724	---	---	0
1651	cyclopenthiazide - HL60	0	1	0.723	---	---	0
1652	finasteride - MCF7	0	3	0.723	---	---	0
1653	doxazosin - MCF7	0	2	-0.723	---	---	0
1654	biotin - MCF7	0	1	-0.723	---	---	0
1655	saquinavir - PC3	0	1	-0.723	---	---	0
1656	eticlopride - HL60	0	1	0.723	---	---	0
1657	cetirizine - HL60	0	1	-0.722	---	---	0
1658	flucloxacillin - HL60	0	1	0.722	---	---	0
1659	betaxolol - PC3	0	1	-0.722	---	---	0
1660	metformin - HL60	0	1	0.722	---	---	0
1661	Prestwick-920 - PC3	0	1	-0.721	---	---	0
1662	cefalotin - MCF7	0	2	-0.721	---	---	0
1663	ritodrine - HL60	0	1	0.721	---	---	0
1664	eldeline - MCF7	0	3	-0.721	---	---	0
1665	solanine - HL60	0	1	-0.72	---	---	0
1666	naringenin - HL60	0	1	0.72	---	---	0
1667	levcycloserine - PC3	0	2	-0.72	---	---	0
1668	cefoperazone - MCF7	0	1	0.72	---	---	0
1669	pyridoxine - MCF7	0	2	-0.72	---	---	0
1670	nafcillin - MCF7	0	2	-0.72	---	---	0
1671	tocainide - PC3	0	1	0.719	---	---	0
1672	cycloserine - HL60	0	1	-0.719	---	---	0
1673	mebeverine - PC3	0	1	0.719	---	---	0
1674	scopolamine N-oxide - PC3	0	2	-0.719	---	---	0
1675	lovastatin - PC3	0	1	0.719	---	---	0
1676	tridihexethyl - HL60	0	1	-0.719	---	---	0
1677	telenzepine - PC3	0	1	-0.719	---	---	0
1678	apramycin - PC3	0	1	-0.718	---	---	0
1679	labetalol - PC3	0	1	0.718	---	---	0
1680	AG-012559 - MCF7	0	1	-0.718	---	---	0
1681	acemetacin - PC3	0	1	0.718	---	---	0
1682	prednisolone - PC3	0	1	-0.718	---	---	0
1683	tacrine - PC3	0	1	-0.717	---	---	0
1684	naftifine - HL60	0	1	-0.717	---	---	0
1685	0175029-0000 - MCF7	0	2	-0.717	---	---	0
1686	moxisylyte - MCF7	0	2	-0.717	---	---	0
1687	levonorgestrel - PC3	0	2	-0.716	---	---	0
1688	thiamphenicol - MCF7	0	2	0.716	---	---	0
1689	cetirizine - MCF7	0	2	-0.716	---	---	0
1690	oxyphenbutazone - PC3	0	1	0.716	---	---	0
1691	neostigmine bromide - MCF7	0	2	0.716	---	---	0
1692	atropine methonitrate - PC3	0	1	-0.716	---	---	0
1693	PF-00539745-00 - MCF7	0	1	0.716	---	---	0
1694	Prestwick-860 - HL60	0	1	-0.716	---	---	0
1695	N-acetyl-L-leucine - PC3	0	1	-0.715	---	---	0
1696	pyridoxine - PC3	0	1	-0.715	---	---	0
1697	netilmicin - HL60	0	1	-0.715	---	---	0
1698	diloxanide - MCF7	0	2	0.715	---	---	0
1699	naringenin - MCF7	0	2	0.715	---	---	0
1700	diperodon - PC3	0	1	0.714	---	---	0
1701	asiaticoside - MCF7	0	2	-0.714	---	---	0
1702	acetylsalicylsalicylic acid - MCF7	0	2	-0.714	---	---	0
1703	fludroxycortide - PC3	0	2	-0.714	---	---	0
1704	tubocurarine chloride - PC3	0	1	-0.713	---	---	0
1705	carbachol - MCF7	0	2	-0.713	---	---	0
1706	clorsulon - PC3	0	1	0.713	---	---	0
1707	fluoxetine - MCF7	0	2	0.713	---	---	0
1708	dequalinium chloride - HL60	0	1	-0.712	---	---	0
1709	salsolidin - HL60	0	1	-0.712	---	---	0
1710	levopropoxyphene - HL60	0	1	0.712	---	---	0
1711	troglitazone - MCF7	0.081	7	0.711	---	---	28
1712	canadine - MCF7	0	2	0.711	---	---	0
1713	estriol - MCF7	0	2	-0.711	---	---	0
1714	PF-00875133-00 - PC3	0	1	0.711	---	---	0
1715	oxytetracycline - PC3	0	1	-0.711	---	---	0
1716	canrenoic acid - PC3	0	2	-0.711	---	---	0
1717	naftifine - PC3	0	1	0.711	---	---	0
1718	methapyrilene - MCF7	0	2	-0.711	---	---	0
1719	xamoterol - MCF7	0	2	0.711	---	---	0
1720	methyldopa - PC3	0	1	0.71	---	---	0
1721	nipecotic acid - PC3	0	1	-0.71	---	---	0
1722	zimeldine - MCF7	0	2	-0.71	---	---	0
1723	oxybutynin - PC3	0	1	-0.71	---	---	0
1724	fluvastatin - HL60	0	1	-0.71	---	---	0
1725	7-aminocephalosporanic acid - PC3	0	1	-0.709	---	---	0
1726	ethionamide - MCF7	0	1	0.709	---	---	0
1727	etifenin - PC3	0	1	-0.709	---	---	0
1728	meclofenamic acid - PC3	0	2	0.709	---	---	0
1729	velnacrine - HL60	0	1	-0.708	---	---	0
1730	corticosterone - HL60	0	1	0.708	---	---	0
1731	calycanthine - PC3	0	1	0.708	---	---	0
1732	verteporfin - MCF7	0	2	-0.708	---	---	0
1733	meclozine - HL60	0	1	-0.707	---	---	0
1734	iopamidol - MCF7	0	2	0.707	---	---	0
1735	procainamide - PC3	0	1	-0.707	---	---	0
1736	corbadrine - PC3	0	1	-0.707	---	---	0
1737	levopropoxyphene - PC3	0	1	-0.707	---	---	0
1738	flavoxate - PC3	0	1	-0.706	---	---	0
1739	sulfabenzamide - HL60	0	1	0.706	---	---	0
1740	meclofenoxate - HL60	0	1	-0.706	---	---	0
1741	nimodipine - PC3	0	1	0.706	---	---	0
1742	biperiden - PC3	0	1	0.705	---	---	0
1743	propofol - PC3	0	1	-0.705	---	---	0
1744	oxolinic acid - MCF7	0	2	-0.705	---	---	0
1745	N-acetyl-L-leucine - MCF7	0	2	-0.704	---	---	0
1746	ticarcillin - MCF7	0	1	0.704	---	---	0
1747	arecoline - PC3	0	1	0.704	---	---	0
1748	mephentermine - PC3	0	2	-0.704	---	---	0
1749	Prestwick-857 - PC3	0	1	0.704	---	---	0
1750	amiodarone - HL60	0	1	-0.704	---	---	0
1751	fursultiamine - PC3	0	1	-0.704	---	---	0
1752	co-dergocrine mesilate - MCF7	0	2	0.704	---	---	0
1753	metolazone - PC3	0	2	-0.703	---	---	0
1754	pyrithyldione - MCF7	0	2	0.703	---	---	0
1755	tinidazole - PC3	0	2	-0.703	---	---	0
1756	folic acid - MCF7	0	2	0.702	---	---	0
1757	cytisine - PC3	0	1	0.702	---	---	0
1758	mestranol - PC3	0	1	0.702	---	---	0
1759	methoxamine - MCF7	0	2	0.702	---	---	0
1760	gabexate - MCF7	0	2	0.701	---	---	0
1761	fenspiride - PC3	0	2	-0.701	---	---	0
1762	pergolide - PC3	0	1	0.701	---	---	0
1763	benzocaine - HL60	0	1	0.701	---	---	0
1764	rescinnamine - HL60	0	1	0.7	---	---	0
1765	phthalylsulfathiazole - HL60	0	1	-0.7	---	---	0
1766	podophyllotoxin - MCF7	0	2	0.7	---	---	0
1767	ginkgolide A - HL60	0	1	-0.7	---	---	0
1768	methacholine chloride - MCF7	0	2	-0.7	---	---	0
1769	2-aminobenzenesulfonamide - PC3	0	1	0.7	---	---	0
1770	etamivan - PC3	0	1	-0.7	---	---	0
1771	cefalotin - HL60	0	1	-0.699	---	---	0
1772	chlorzoxazone - MCF7	0	2	-0.699	---	---	0
1773	oxytetracycline - MCF7	0	1	-0.699	---	---	0
1774	fosfosal - PC3	0	1	-0.699	---	---	0
1775	myricetin - MCF7	0	2	0.699	---	---	0
1776	penbutolol - HL60	0	1	0.698	---	---	0
1777	methanthelinium bromide - HL60	0	1	0.698	---	---	0
1778	hymecromone - PC3	0	1	-0.698	---	---	0
1779	thiamazole - HL60	0	1	0.698	---	---	0
1780	tolnaftate - MCF7	0	2	0.698	---	---	0
1781	PNU-0293363 - MCF7	0	1	0.697	---	---	0
1782	suprofen - PC3	0	1	0.697	---	---	0
1783	etamsylate - MCF7	0	2	-0.697	---	---	0
1784	propofol - HL60	0	1	-0.697	---	---	0
1785	Prestwick-864 - MCF7	0	2	-0.696	---	---	0
1786	cefazolin - PC3	0	2	-0.696	---	---	0
1787	isoflupredone - MCF7	0	1	0.696	---	---	0
1788	ranitidine - MCF7	0	2	-0.695	---	---	0
1789	ethaverine - MCF7	0	2	-0.695	---	---	0
1790	dexpanthenol - MCF7	0	2	-0.695	---	---	0
1791	cefoxitin - PC3	0	1	-0.695	---	---	0
1792	ethisterone - PC3	0	2	0.695	---	---	0
1793	fluspirilene - PC3	0	1	-0.695	---	---	0
1794	sulindac - PC3	0	2	0.694	---	---	0
1795	tyloxapol - PC3	0	1	-0.694	---	---	0
1796	dantrolene - PC3	0	2	0.694	---	---	0
1797	levomepromazine - MCF7	0	2	0.694	---	---	0
1798	iobenguane - PC3	0	1	-0.694	---	---	0
1799	denatonium benzoate - MCF7	0	2	-0.694	---	---	0
1800	repaglinide - HL60	0	1	-0.693	---	---	0
1801	theobromine - PC3	0	1	0.693	---	---	0
1802	atovaquone - HL60	0	1	-0.693	---	---	0
1803	sulfametoxydiazine - PC3	0	1	-0.693	---	---	0
1804	hexylcaine - PC3	0	1	-0.693	---	---	0
1805	nystatin - MCF7	0	1	-0.693	---	---	0
1806	maprotiline - MCF7	0	2	0.692	---	---	0
1807	Prestwick-685 - MCF7	0	2	-0.692	---	---	0
1808	PF-00539745-00 - PC3	0	2	0.692	---	---	0
1809	roxithromycin - MCF7	0	2	-0.692	---	---	0
1810	aminocaproic acid - PC3	0	1	-0.691	---	---	0
1811	ursodeoxycholic acid - MCF7	0	1	-0.691	---	---	0
1812	glimepiride - PC3	0	1	-0.691	---	---	0
1813	molsidomine - MCF7	0	2	-0.691	---	---	0
1814	levocabastine - PC3	0	1	0.691	---	---	0
1815	apomorphine - PC3	0	2	-0.691	---	---	0
1816	chlorogenic acid - HL60	0	1	0.69	---	---	0
1817	dimethadione - HL60	0	1	-0.69	---	---	0
1818	diphenhydramine - HL60	0	1	0.69	---	---	0
1819	ethaverine - PC3	0	1	-0.69	---	---	0
1820	prazosin - PC3	0	1	0.69	---	---	0
1821	cefaclor - MCF7	0	2	0.69	---	---	0
1822	crotamiton - PC3	0	1	0.689	---	---	0
1823	estropipate - PC3	0	1	0.689	---	---	0
1824	glibenclamide - PC3	0	1	-0.689	---	---	0
1825	sulfamonomethoxine - PC3	0	1	0.689	---	---	0
1826	neomycin - MCF7	0	2	-0.689	---	---	0
1827	chloroquine - PC3	0	1	-0.688	---	---	0
1828	flunixin - MCF7	0	2	-0.688	---	---	0
1829	penbutolol - MCF7	0	2	0.688	---	---	0
1830	cefalexin - PC3	0	1	-0.688	---	---	0
1831	carbimazole - MCF7	0	2	0.687	---	---	0
1832	isopropamide iodide - PC3	0	1	-0.687	---	---	0
1833	tetroquinone - PC3	0	1	-0.687	---	---	0
1834	mimosine - PC3	0	1	-0.687	---	---	0
1835	tolazamide - PC3	0	1	0.687	---	---	0
1836	arcaine - HL60	0	1	-0.686	---	---	0
1837	chloramphenicol - MCF7	0	1	-0.686	---	---	0
1838	selegiline - PC3	0	1	0.686	---	---	0
1839	pyrantel - PC3	0	2	-0.686	---	---	0
1840	Prestwick-682 - HL60	0	1	0.686	---	---	0
1841	morantel - PC3	0	2	-0.685	---	---	0
1842	sotalol - PC3	0	1	-0.685	---	---	0
1843	minaprine - MCF7	0	2	-0.685	---	---	0
1844	16,16-dimethylprostaglandin E2 - MCF7	0	1	0.685	---	---	0
1845	cromoglicic acid - MCF7	0	1	0.685	---	---	0
1846	Prestwick-1082 - PC3	0	1	0.684	---	---	0
1847	proxyphylline - PC3	0	1	-0.684	---	---	0
1848	felbinac - MCF7	0	2	0.684	---	---	0
1849	trimethoprim - MCF7	0	2	-0.684	---	---	0
1850	antimycin A - PC3	0	2	-0.684	---	---	0
1851	N-acetyl-L-aspartic acid - PC3	0	1	0.684	---	---	0
1852	disopyramide - PC3	0	1	0.684	---	---	0
1853	equilin - PC3	0	1	-0.684	---	---	0
1854	androsterone - MCF7	0	2	-0.683	---	---	0
1855	calcium folinate - MCF7	0	2	0.683	---	---	0
1856	profenamine - HL60	0	1	-0.683	---	---	0
1857	raubasine - PC3	0	1	0.683	---	---	0
1858	pyrantel - MCF7	0	2	-0.683	---	---	0
1859	doxepin - MCF7	0	1	0.683	---	---	0
1860	cefsulodin - PC3	0	1	-0.682	---	---	0
1861	alverine - MCF7	0	1	0.682	---	---	0
1862	ginkgolide A - PC3	0	1	-0.682	---	---	0
1863	domperidone - HL60	0	1	0.682	---	---	0
1864	betulinic acid - HL60	0	1	-0.682	---	---	0
1865	vigabatrin - MCF7	0	1	0.682	---	---	0
1866	methanthelinium bromide - PC3	0	1	-0.681	---	---	0
1867	pyrazinamide - MCF7	0	2	-0.681	---	---	0
1868	lumicolchicine - HL60	0	1	0.681	---	---	0
1869	ebselen - MCF7	0	1	-0.681	---	---	0
1870	nicotinic acid - HL60	0	1	-0.681	---	---	0
1871	tenoxicam - PC3	0	1	0.681	---	---	0
1872	drofenine - PC3	0	1	-0.681	---	---	0
1873	sulfathiazole - MCF7	0	2	-0.68	---	---	0
1874	alprostadil - MCF7	0	3	0.68	---	---	0
1875	hydroquinine - PC3	0	1	0.68	---	---	0
1876	5149715 - MCF7	0	1	0.679	---	---	0
1877	sulfanilamide - PC3	0	1	-0.679	---	---	0
1878	cloxacillin - PC3	0	1	0.679	---	---	0
1879	topiramate - MCF7	0	1	0.679	---	---	0
1880	ambroxol - PC3	0	1	0.679	---	---	0
1881	metacycline - MCF7	0	2	-0.679	---	---	0
1882	vigabatrin - HL60	0	1	0.678	---	---	0
1883	anabasine - MCF7	0	2	-0.678	---	---	0
1884	azapropazone - MCF7	0	1	-0.677	---	---	0
1885	carbarsone - HL60	0	1	0.677	---	---	0
1886	meglumine - HL60	0	1	-0.677	---	---	0
1887	kanamycin - MCF7	0	2	-0.677	---	---	0
1888	propidium iodide - HL60	0	1	0.677	---	---	0
1889	3-acetamidocoumarin - MCF7	0	2	0.677	---	---	0
1890	ramipril - HL60	0	1	-0.677	---	---	0
1891	prazosin - HL60	0	1	-0.676	---	---	0
1892	octopamine - PC3	0	1	-0.676	---	---	0
1893	levocabastine - MCF7	0	2	-0.675	---	---	0
1894	isometheptene - HL60	0	1	0.675	---	---	0
1895	SB-203580 - MCF7	0	3	0.675	---	---	0
1896	L-methionine sulfoximine - HL60	0	1	-0.675	---	---	0
1897	rolitetracycline - HL60	0	1	-0.675	---	---	0
1898	scopoletin - MCF7	0	1	-0.675	---	---	0
1899	carmustine - PC3	0	1	-0.675	---	---	0
1900	tomatidine - MCF7	0	2	-0.674	---	---	0
1901	ceforanide - MCF7	0	2	0.674	---	---	0
1902	nipecotic acid - MCF7	0	2	-0.674	---	---	0
1903	phenacetin - MCF7	0	2	-0.674	---	---	0
1904	hesperetin - MCF7	0	2	-0.673	---	---	0
1905	suxibuzone - MCF7	0	2	-0.673	---	---	0
1906	gelsemine - PC3	0	1	0.672	---	---	0
1907	ofloxacin - PC3	0	2	-0.672	---	---	0
1908	rifampicin - PC3	0	1	0.672	---	---	0
1909	isoconazole - PC3	0	2	-0.672	---	---	0
1910	clidinium bromide - PC3	0	1	0.672	---	---	0
1911	atractyloside - HL60	0	1	0.671	---	---	0
1912	cyclizine - MCF7	0	2	-0.671	---	---	0
1913	flunisolide - HL60	0	1	-0.671	---	---	0
1914	tolazamide - MCF7	0	1	0.671	---	---	0
1915	sisomicin - PC3	0	1	0.671	---	---	0
1916	pseudopelletierine - MCF7	0	2	-0.671	---	---	0
1917	tetrahydroalstonine - PC3	0	1	0.671	---	---	0
1918	pentolonium - PC3	0	2	-0.671	---	---	0
1919	adenosine phosphate - PC3	0	1	0.671	---	---	0
1920	heptaminol - MCF7	0	2	0.67	---	---	0
1921	amoxicillin - MCF7	0	2	-0.67	---	---	0
1922	alcuronium chloride - MCF7	0	2	-0.67	---	---	0
1923	gentamicin - MCF7	0	2	0.669	---	---	0
1924	nimesulide - PC3	0	1	-0.669	---	---	0
1925	hydrocortisone - PC3	0	1	-0.669	---	---	0
1926	fenoterol - PC3	0	1	-0.669	---	---	0
1927	methoxamine - PC3	0	1	0.669	---	---	0
1928	levopropoxyphene - MCF7	0	2	0.669	---	---	0
1929	repaglinide - MCF7	0	2	-0.669	---	---	0
1930	crotamiton - MCF7	0	2	-0.668	---	---	0
1931	merbromin - HL60	0	1	0.668	---	---	0
1932	sulfinpyrazone - PC3	0	1	-0.668	---	---	0
1933	ganciclovir - HL60	0	1	-0.668	---	---	0
1934	dicloxacillin - MCF7	0	2	0.668	---	---	0
1935	eucatropine - MCF7	-0.216	3	-0.667	---	---	33
1936	procainamide - HL60	0	1	0.667	---	---	0
1937	streptozocin - HL60	0	1	0.667	---	---	0
1938	hydroflumethiazide - HL60	0	1	-0.667	---	---	0
1939	protriptyline - MCF7	0	2	0.667	---	---	0
1940	aminophylline - HL60	0	1	-0.666	---	---	0
1941	clemastine - MCF7	0	2	0.666	---	---	0
1942	acepromazine - MCF7	0	2	-0.666	---	---	0
1943	N-acetylmuramic acid - HL60	0	1	0.666	---	---	0
1944	physostigmine - PC3	0	1	0.666	---	---	0
1945	rolipram - PC3	0	1	-0.666	---	---	0
1946	chenodeoxycholic acid - MCF7	0	2	0.666	---	---	0
1947	propafenone - PC3	0	1	-0.666	---	---	0
1948	equilin - HL60	0	1	-0.666	---	---	0
1949	ciclopirox - PC3	0	1	0.665	---	---	0
1950	pargyline - MCF7	0	2	-0.665	---	---	0
1951	SR-95639A - HL60	0	1	0.665	---	---	0
1952	xylazine - HL60	0	1	-0.665	---	---	0
1953	dexibuprofen - HL60	0	1	0.665	---	---	0
1954	ambroxol - MCF7	0	2	0.665	---	---	0
1955	promethazine - MCF7	0	2	-0.665	---	---	0
1956	cefadroxil - PC3	0	1	-0.664	---	---	0
1957	15(S)-15-methylprostaglandin E2 - PC3	0	2	0.664	---	---	0
1958	alfuzosin - PC3	0	1	-0.664	---	---	0
1959	megestrol - PC3	0	1	-0.664	---	---	0
1960	metergoline - PC3	0	1	0.664	---	---	0
1961	Prestwick-664 - PC3	0	2	-0.664	---	---	0
1962	prasterone - PC3	0	1	-0.663	---	---	0
1963	isoflupredone - HL60	0	1	0.663	---	---	0
1964	niridazole - MCF7	0	2	-0.663	---	---	0
1965	tetracycline - MCF7	0	2	0.663	---	---	0
1966	benzylpenicillin - HL60	0	1	-0.663	---	---	0
1967	metoprolol - PC3	0	1	0.663	---	---	0
1968	meropenem - HL60	0	1	-0.662	---	---	0
1969	trimethobenzamide - MCF7	0	2	0.662	---	---	0
1970	scopolamine - PC3	0	1	-0.662	---	---	0
1971	cloxacillin - MCF7	0	2	0.662	---	---	0
1972	omeprazole - MCF7	0	2	-0.662	---	---	0
1973	dihydroergotamine - MCF7	0	2	0.662	---	---	0
1974	amikacin - PC3	0	1	0.661	---	---	0
1975	(-)-MK-801 - PC3	0	1	-0.661	---	---	0
1976	sitosterol - MCF7	0	2	-0.661	---	---	0
1977	budesonide - MCF7	0	2	-0.66	---	---	0
1978	glimepiride - HL60	0	1	0.66	---	---	0
1979	gliquidone - HL60	0	1	0.66	---	---	0
1980	pheneticillin - HL60	0	1	0.66	---	---	0
1981	H-89 - MCF7	0	1	-0.66	---	---	0
1982	physostigmine - MCF7	0	2	-0.66	---	---	0
1983	folic acid - PC3	0	1	0.659	---	---	0
1984	SB-203580 - PC3	0	2	-0.659	---	---	0
1985	suramin sodium - PC3	0	2	0.659	---	---	0
1986	laudanosine - PC3	0	1	0.659	---	---	0
1987	metrizamide - PC3	0	1	-0.659	---	---	0
1988	ticarcillin - HL60	0	1	-0.659	---	---	0
1989	fipexide - MCF7	0	1	-0.659	---	---	0
1990	ciclopirox - MCF7	0	2	0.659	---	---	0
1991	AH-23848 - MCF7	0	2	-0.658	---	---	0
1992	nomegestrol - PC3	0	1	0.658	---	---	0
1993	thioguanosine - PC3	0	1	-0.658	---	---	0
1994	esculetin - HL60	0	1	0.658	---	---	0
1995	5194442 - MCF7	0	2	0.658	---	---	0
1996	oxprenolol - PC3	0	1	-0.658	---	---	0
1997	enilconazole - HL60	0	1	-0.658	---	---	0
1998	buflomedil - MCF7	0	2	-0.657	---	---	0
1999	piromidic acid - HL60	0	1	-0.657	---	---	0
[truncated: 1,588 more rows]

## Sheet: by atc code
rank	atc code	mean	n	enrichment	p	specificity	percent non-null
1	C01AA	0.492	10	0.961	0	0.0046	100
2	P02DA	0.354	5	0.935	0	0.0105	100
3	P02CX	0.384	6	0.934	0	0.0093	100
4	N05AC	0.191	24	0.595	0	0.0275	75
5	N05AB	0.136	60	0.485	0	0.0718	53
6	C01AB	0.463	3	0.963	8e-05	0.0347	100
7	A07DA	0.212	6	0.802	0.0001	0.0101	83
8	C08EA	0.292	7	0.712	0.00042	0.0363	85
9	D08AH	0.266	5	0.782	0.00104	0.0262	80
10	G01AC	0.266	5	0.782	0.00104	0.0262	80
11	P01AA	0.266	5	0.782	0.00104	0.0262	80
12	P01BC	0.322	5	0.741	0.00268	0.0833	80
13	B02BA	0.335	2	0.954	0.00392	0.0711	100
14	P03AA	0.298	5	0.702	0.00557	0.0867	80
15	C05AX	0.145	4	0.748	0.00774	0.0212	50
16	C05CX	0.145	4	0.748	0.00774	0.0212	50
17	P01AX	0.387	9	0.516	0.00889	0.0516	66
18	N05AG	0.254	8	0.536	0.01125	0.161	62
19	M01AA	0.135	4	0.716	0.01315	0.0881	50
20	A06AB	0.314	4	0.697	0.01743	0.0745	75
21	A06AG	0.314	4	0.697	0.01743	0.0745	75
22	A04AA	-0.42	4	-0.693	0.01884	0.0301	75
23	J01XX	-0.232	4	-0.641	0.03991	0.0119	50
24	P02CA	0.135	16	0.331	0.0454	0.2994	50
25	C02DA	-0.348	5	-0.565	0.04708	0.0854	60
26	V03AH	-0.348	5	-0.565	0.04708	0.0854	60
27	L01CB	0.223	4	0.621	0.0517	0.2615	75
28	C10AX	0.117	10	0.394	0.06653	0.0516	50
29	A07AX	0.23	4	0.598	0.06857	0.1579	75
30	P01BB	-0.447	3	-0.656	0.08094	0.0519	66
31	G04BX	0.104	4	0.582	0.08154	0.2078	50
32	C08EX	0.176	7	0.449	0.08403	0.2406	57
33	P02CF	0.232	5	0.52	0.0886	0.2903	60
34	A07AC	0.138	5	0.486	0.13109	0.1967	60
35	M04AC	0.115	6	0.436	0.14624	0.2471	50
36	R01BA	0.158	4	0.496	0.18892	0.0946	50
37	G03GB	0.188	4	0.469	0.24112	0.3793	50
38	C03CC	0.155	3	0.533	0.25889	0.3655	66
39	R03AB	-0.212	4	-0.446	0.30044	0.3071	50
40	R03CB	-0.212	4	-0.446	0.30044	0.3071	50
41	D10BA	-0.008	4	0.441	0.30828	0.4301	50
42	N07AX	-0.322	4	-0.443	0.30916	0.4575	50
43	N04BB	-0.225	4	-0.417	0.37998	0.5621	50
44	G03HA	-0.121	4	-0.792	---	---	25
45	N05CE	0.036	4	0.703	---	---	25
46	B02BX	0	4	-0.697	---	---	0
47	M03AA	0	2	-0.67	---	---	0
48	A10BX	0	4	-0.669	---	---	0
49	R05CB	0.029	4	0.665	---	---	25
50	H03BA	0	4	-0.643	---	---	0
51	C02DB	-0.136	6	-0.629	---	---	33
52	P01BE	-0.134	3	-0.62	---	---	33
53	V04CH	0	4	-0.619	---	---	0
54	R05CA	-0.049	10	-0.598	---	---	10
55	G03DA	-0.135	4	-0.587	---	---	25
56	P02BX	0	4	-0.585	---	---	0
57	L01DB	-0.07	10	-0.577	---	---	20
58	J02AX	-0.102	4	-0.57	---	---	25
59	C02BB	-0.193	3	-0.569	---	---	33
60	D08AF	0	4	0.569	---	---	0
61	M09AA	0.075	4	0.568	---	---	25
62	M05BA	0	4	-0.54	---	---	0
63	R01AX	0	3	-0.538	---	---	0
64	R03BB	0	3	-0.538	---	---	0
65	G01AX	0.061	8	0.536	---	---	25
66	A16AX	0.057	7	0.531	---	---	42
67	C02KD	0.039	4	-0.528	---	---	0
68	S01LA	0	3	-0.522	---	---	0
69	G03XC	0.101	7	0.515	---	---	42
70	A03AD	0	4	-0.506	---	---	0
71	C04AD	0	5	0.505	---	---	0
72	A07XA	0	4	0.502	---	---	0
73	B03BB	0	4	0.501	---	---	0
74	D05AD	0	7	-0.501	---	---	0
75	D05BA	0	7	-0.501	---	---	0
76	P02CE	0	4	-0.5	---	---	0
77	R03BX	0	5	-0.495	---	---	0
78	R03DX	0	5	-0.495	---	---	0
79	N04BA	-0.149	5	-0.49	---	---	20
80	C01EA	-0.021	7	0.488	---	---	14
81	N07BA	0	4	-0.485	---	---	0
82	C01EB	-0.029	12	-0.48	---	---	8
83	N04BD	0	4	-0.478	---	---	0
84	S01EX	0	3	-0.477	---	---	0
85	J05AE	0	4	-0.473	---	---	0
86	C01CE	-0.151	13	-0.466	---	---	30
87	J04BA	0.02	10	0.462	---	---	10
88	C01CX	0	3	0.46	---	---	0
89	M03BA	-0.088	7	-0.457	---	---	14
90	A05AX	-0.114	4	-0.456	---	---	25
91	N05BB	-0.154	5	-0.448	---	---	20
92	A07EB	0	2	0.448	---	---	0
93	R03BC	0	2	0.448	---	---	0
94	N03AB	-0.132	10	-0.447	---	---	20
95	D06BB	0.016	15	0.447	---	---	20
96	N05BE	0	4	-0.446	---	---	0
97	D09AA	0.079	18	0.443	---	---	27
98	D06BX	-0.007	5	0.442	---	---	20
99	N03AA	0	4	0.441	---	---	0
100	L01BA	-0.227	8	-0.44	---	---	37
101	R02AB	-0.121	8	-0.439	---	---	25
102	A05BA	0.046	6	-0.434	---	---	0
103	P01AC	0	4	0.431	---	---	0
104	C01BG	0	4	-0.43	---	---	0
105	A08AB	0	5	-0.428	---	---	0
106	V04CD	0.063	4	-0.427	---	---	0
107	N02BE	-0.039	8	-0.424	---	---	12
108	J01DB	-0.084	22	-0.423	---	---	13
109	N05AF	0.096	12	0.421	---	---	33
110	D07AD	-0.127	8	-0.41	---	---	25
111	C08DB	-0.064	5	-0.41	---	---	20
112	V03AF	-0.097	5	0.407	---	---	0
113	G03BA	0	5	0.4	---	---	0
114	L01AX	0	4	-0.4	---	---	0
115	P02BA	-0.174	8	-0.398	---	---	37
116	A03AB	-0.073	13	-0.397	---	---	15
117	N07XX	-0.042	5	-0.397	---	---	20
118	N05AL	-0.03	14	-0.397	---	---	14
119	P01BX	-0.211	3	-0.395	---	---	33
120	N03AC	0	4	-0.394	---	---	0
121	J01DE	-0.088	4	-0.393	---	---	25
122	L01CD	-0.149	6	-0.391	---	---	33
123	A03AX	-0.008	8	0.391	---	---	25
124	C04AA	-0.228	5	-0.389	---	---	40
125	J04AD	0	3	0.389	---	---	0
126	A07AB	-0.043	14	-0.388	---	---	14
127	D01BA	-0.073	5	-0.387	---	---	20
128	C04AC	0	4	-0.387	---	---	0
129	C10AD	0	4	-0.387	---	---	0
130	G04CB	-0.089	6	0.385	---	---	0
131	J04AK	-0.058	9	-0.383	---	---	11
132	A11HA	-0.082	11	-0.378	---	---	18
133	D08AC	0.018	5	0.377	---	---	20
134	R02AA	0.018	5	0.377	---	---	20
135	N02BG	0.011	9	0.375	---	---	44
136	A11DA	-0.028	8	-0.375	---	---	12
137	J05AX	0	5	-0.372	---	---	0
138	R06AX	0.109	36	0.372	---	---	44
139	M03CA	0	6	0.371	---	---	0
140	P01BD	-0.08	5	-0.368	---	---	20
141	J01XE	0.046	5	0.368	---	---	20
142	C02DG	-0.168	4	-0.367	---	---	25
143	N06BX	-0.024	17	-0.366	---	---	5
144	J01DH	0.068	4	-0.365	---	---	0
145	N02CA	-0.037	10	0.362	---	---	10
146	H03BB	0.014	9	0.362	---	---	11
147	A04AD	0	4	-0.362	---	---	0
148	N05CM	0	4	-0.362	---	---	0
149	D10AF	-0.129	18	-0.361	---	---	22
150	J01XC	0	4	-0.359	---	---	0
151	L01CA	-0.183	3	-0.358	---	---	33
152	G01AA	-0.061	19	-0.358	---	---	10
153	D03AX	-0.059	8	-0.357	---	---	12
154	C03BD	-0.042	4	-0.355	---	---	25
155	J01XA	-0.112	4	0.355	---	---	0
156	C03DA	0	5	-0.351	---	---	0
157	P01CC	-0.078	8	-0.351	---	---	12
158	G03DB	-0.173	11	-0.35	---	---	36
159	V03AC	-0.115	8	-0.349	---	---	25
160	N03AX	-0.087	5	-0.349	---	---	20
161	G02AB	0.064	4	-0.348	---	---	0
162	N05CH	-0.125	4	-0.348	---	---	25
163	J01EC	-0.11	10	-0.347	---	---	20
164	J01ED	-0.093	23	-0.346	---	---	17
165	C08DA	0	6	0.346	---	---	0
166	N05AE	0	4	-0.345	---	---	0
167	J01EA	-0.086	5	-0.344	---	---	20
168	J01DF	-0.197	5	-0.338	---	---	40
169	A14AA	0.08	4	0.337	---	---	25
170	N06AA	0.076	46	0.334	---	---	41
171	B03BA	0	4	-0.333	---	---	0
172	J01CE	0.019	12	0.333	---	---	8
173	C09AA	-0.146	16	-0.33	---	---	31
174	A07EC	0	10	-0.328	---	---	0
175	N02CX	0.045	8	0.325	---	---	37
176	N02BB	-0.05	19	-0.322	---	---	10
177	A03BA	0.026	9	-0.322	---	---	0
178	G03CB	-0.031	9	0.321	---	---	22
179	L02AA	-0.036	6	0.321	---	---	16
180	N07AB	0	8	-0.319	---	---	0
181	A02BC	-0.077	8	-0.317	---	---	12
182	L01XB	0	3	0.315	---	---	0
183	C04AE	0.057	9	0.309	---	---	22
184	L02BB	-0.126	9	-0.308	---	---	22
185	G02CB	0.047	14	0.307	---	---	35
186	J01GA	-0.156	4	-0.306	---	---	25
187	P02BB	0.094	5	0.305	---	---	40
188	J01CF	0.019	12	0.305	---	---	8
189	S01FA	-0.049	23	-0.304	---	---	8
190	V08AC	-0.109	12	-0.304	---	---	16
191	J01XB	-0.149	4	0.302	---	---	0
192	N07BB	0.084	10	0.302	---	---	40
193	N03AF	0.1	8	0.3	---	---	25
194	H02AA	-0.17	12	-0.299	---	---	33
195	N01BB	-0.042	23	-0.298	---	---	8
196	G03AC	-0.133	19	-0.298	---	---	31
197	S01HA	-0.081	26	-0.298	---	---	15
198	V03AB	-0.024	18	-0.296	---	---	5
199	C02CC	0	7	-0.296	---	---	0
200	C03DB	0.093	10	0.295	---	---	40
201	J01FF	-0.161	8	-0.295	---	---	37
202	S02DA	0	5	-0.29	---	---	0
203	G02CA	-0.047	7	-0.289	---	---	14
204	G04CA	-0.036	9	-0.288	---	---	11
205	D01AC	0.117	35	0.288	---	---	45
206	C03BA	-0.067	28	-0.285	---	---	14
207	L01XE	-0.133	3	-0.284	---	---	33
208	G01AG	0	4	-0.284	---	---	0
209	N05AH	0.068	21	0.283	---	---	28
210	N06DA	0	8	-0.282	---	---	0
211	N04BC	-0.052	18	-0.281	---	---	16
212	G01AF	0.098	37	0.281	---	---	45
213	N05AX	0	3	-0.281	---	---	0
214	M01AH	0.015	14	0.28	---	---	21
215	N01AX	0.093	14	-0.28	---	---	0
216	G03DC	-0.157	19	-0.279	---	---	36
217	M01AX	-0.103	19	-0.278	---	---	21
218	C02AC	-0.088	16	-0.278	---	---	18
219	D01AA	-0.031	12	-0.276	---	---	8
220	P02CB	0	4	-0.276	---	---	0
221	D07AA	0.025	12	-0.274	---	---	0
222	L04AX	-0.089	22	-0.274	---	---	18
223	S01EA	-0.09	8	-0.273	---	---	25
224	C01BA	-0.034	18	-0.271	---	---	5
225	C02CA	0.054	14	-0.269	---	---	0
226	N03AD	-0.096	8	-0.268	---	---	25
227	G03XA	-0.039	4	0.268	---	---	25
228	B01AC	0.024	35	-0.266	---	---	5
229	A05AA	0	7	0.264	---	---	0
230	L04AD	-0.014	9	0.262	---	---	11
231	R02AD	0.018	13	0.262	---	---	7
232	D06BA	-0.024	23	-0.261	---	---	8
233	J04AC	-0.081	5	-0.261	---	---	20
234	A07EA	-0.071	23	-0.259	---	---	17
235	C03AA	-0.071	24	-0.258	---	---	12
236	A11CC	-0.049	8	-0.257	---	---	12
237	N07AA	0	4	-0.257	---	---	0
238	L01BB	-0.065	3	-0.256	---	---	33
239	J01MB	0.001	25	-0.256	---	---	4
240	S01EB	-0.08	16	-0.254	---	---	12
241	J01MA	-0.001	25	-0.253	---	---	4
242	C02KC	0.055	4	-0.252	---	---	0
243	S01EC	0.001	20	-0.251	---	---	5
244	M01AC	0.049	8	0.251	---	---	25
245	G01AD	0.05	4	0.251	---	---	25
246	D06AX	-0.048	24	-0.248	---	---	12
247	C04AB	-0.031	12	-0.248	---	---	8
248	N07CA	0.039	12	-0.248	---	---	0
249	C01BB	0.021	15	0.248	---	---	13
250	A10BA	0.035	17	0.246	---	---	23
251	B02AA	0	8	0.245	---	---	0
252	A01AD	-0.004	17	-0.245	---	---	5
253	D07XC	0.036	7	0.244	---	---	28
254	A02BA	-0.02	19	-0.244	---	---	5
255	N06AX	0.042	18	-0.244	---	---	0
256	N02BA	0.007	18	-0.243	---	---	5
257	N04AA	0.004	20	0.243	---	---	15
258	S01ED	-0.034	16	-0.243	---	---	6
259	J01AA	-0.043	41	-0.242	---	---	9
260	P01CX	-0.157	4	-0.241	---	---	25
261	C05AD	-0.077	32	-0.24	---	---	15
262	N02AF	0.048	5	0.239	---	---	20
263	P02CC	0.04	9	-0.239	---	---	0
264	R03DA	-0.043	21	-0.237	---	---	14
265	V04CA	0.032	7	-0.234	---	---	0
266	S01AA	-0.021	68	-0.233	---	---	5
267	S01AX	-0.005	30	-0.233	---	---	6
268	D07XA	0.021	8	-0.233	---	---	0
269	S01XA	0.025	8	-0.232	---	---	0
270	V04CG	0.046	5	0.232	---	---	20
271	S01GX	0	12	-0.231	---	---	0
272	M01AB	-0.044	49	-0.231	---	---	12
273	L02BG	0.039	5	0.23	---	---	20
274	J01XD	-0.027	16	-0.23	---	---	12
275	P01AB	-0.027	16	-0.23	---	---	12
276	C02DC	-0.1	5	-0.23	---	---	20
277	N06DX	0	4	-0.23	---	---	0
278	A07AA	-0.049	32	-0.23	---	---	9
279	G03XB	0.073	4	-0.229	---	---	0
280	M02AX	-0.075	5	-0.226	---	---	20
281	C10AA	-0.03	12	-0.224	---	---	8
282	L01AD	0.007	15	0.222	---	---	20
283	C07AG	0.054	4	0.222	---	---	25
284	C04AX	0.052	37	0.221	---	---	35
285	A03AA	0.053	12	0.221	---	---	41
286	L02AB	-0.087	4	-0.22	---	---	25
287	C03CA	-0.025	16	-0.22	---	---	6
288	J02AB	0.076	9	0.22	---	---	33
289	J01EB	-0.011	28	-0.219	---	---	7
290	R05DA	0.028	8	-0.218	---	---	0
291	R05DB	-0.012	23	-0.217	---	---	17
292	R06AC	0.061	12	-0.217	---	---	0
293	N01BA	-0.049	12	-0.216	---	---	8
294	G02AD	-0.008	8	0.216	---	---	25
295	J01GB	0	33	-0.215	---	---	3
296	D06AA	0.019	19	-0.214	---	---	0
297	M03BX	-0.055	22	-0.214	---	---	13
298	J01FA	-0.041	37	-0.214	---	---	10
299	S01BC	-0.024	30	-0.213	---	---	13
300	V08AB	-0.123	26	-0.213	---	---	26
301	R07AB	0.015	12	-0.21	---	---	0
302	J01BA	0	9	-0.208	---	---	0
303	G02CC	-0.031	13	0.204	---	---	7
304	G04BD	0.057	8	0.201	---	---	25
305	C07AA	-0.071	36	-0.201	---	---	13
306	L01AA	-0.007	7	0.201	---	---	28
307	R06AA	-0.025	23	0.201	---	---	8
308	C01BD	-0.027	9	-0.2	---	---	11
309	J04AB	0.038	11	0.2	---	---	27
310	N01BX	0.029	8	0.199	---	---	12
311	M03BB	0.033	8	0.199	---	---	25
312	M04AB	-0.023	11	0.199	---	---	36
313	J05AF	-0.061	8	-0.198	---	---	12
314	R06AE	0.104	19	0.197	---	---	36
315	D07AC	-0.032	35	-0.196	---	---	11
316	C07AB	0.021	21	0.193	---	---	9
317	A10BB	0.014	41	-0.193	---	---	0
318	D10AA	0.016	16	0.192	---	---	25
319	J01DD	-0.058	22	-0.19	---	---	13
320	N06AF	-0.029	25	-0.19	---	---	8
321	J01CA	-0.062	41	-0.189	---	---	14
322	S02AA	0.059	42	0.189	---	---	23
323	M01AE	-0.041	54	-0.188	---	---	14
324	L04AA	0.025	51	0.187	---	---	25
325	C10AB	-0.004	18	-0.185	---	---	5
326	C08CA	0.082	31	0.185	---	---	22
327	B05CA	0.017	18	-0.184	---	---	5
328	D04AA	0.041	20	0.183	---	---	15
329	G03CC	-0.006	17	-0.182	---	---	11
330	N03AG	0.044	60	0.179	---	---	26
331	N06AB	-0.032	21	-0.179	---	---	9
332	H03AA	0.042	8	-0.177	---	---	12
333	A02BX	-0.021	14	-0.172	---	---	14
334	M01AG	0.007	20	-0.17	---	---	5
335	S03AA	0.016	28	-0.168	---	---	3
336	S02BA	-0.023	19	-0.167	---	---	10
337	S03BA	-0.027	16	-0.167	---	---	12
338	S01AB	-0.002	13	-0.166	---	---	7
339	L02BA	0.028	47	0.166	---	---	36
340	A01AB	0.027	53	0.165	---	---	26
341	C01BC	0.043	10	-0.165	---	---	0
342	N05AD	0.026	43	0.162	---	---	13
343	D04AB	-0.05	30	-0.161	---	---	13
344	G03CA	-0.034	45	-0.161	---	---	11
345	R03AC	0.001	21	-0.158	---	---	9
346	D10AD	0.06	26	0.157	---	---	34
347	R01AC	0.03	12	0.157	---	---	16
348	R03CC	-0.023	25	-0.156	---	---	12
349	R06AD	0.004	12	0.154	---	---	25
350	D07XB	0.016	23	0.154	---	---	17
351	G04BE	-0.046	28	-0.153	---	---	14
352	A03FA	0.011	24	0.151	---	---	16
353	D07AB	0.012	27	0.149	---	---	22
354	S01GA	0.032	20	0.148	---	---	20
355	R01AA	0.031	16	0.148	---	---	18
356	R01AB	0.031	16	0.148	---	---	18
357	P01BA	0.023	12	0.147	---	---	25
358	C05AA	-0.005	28	-0.145	---	---	7
359	H02AB	-0.025	40	-0.143	---	---	10
360	R06AB	0.004	13	0.138	---	---	15
361	C02AA	0.046	6	0.136	---	---	16
362	J05AB	-0.077	23	-0.135	---	---	17
363	B01AA	0.025	15	-0.132	---	---	0
364	A10BG	-0.064	41	-0.132	---	---	21
365	C01CA	-0.041	35	-0.131	---	---	11
366	A01AC	0.005	16	0.131	---	---	18
367	R03BA	-0.001	29	-0.124	---	---	10
368	S01BA	0.004	45	-0.124	---	---	6
369	S01CB	-0.006	23	-0.124	---	---	8
370	S01AD	-0.049	23	0.122	---	---	13
371	L01XX	0.04	34	0.115	---	---	20
372	J01DC	0.001	35	0.113	---	---	14
373	D11AX	-0.04	29	0.111	---	---	13
374	M02AA	-0.021	83	-0.106	---	---	9
375	N05AA	-0.009	37	0.1	---	---	13
376	D01AE	-0.001	21	-0.099	---	---	14
377	C01DX	0.038	21	0.098	---	---	23
378	R01AD	-0.001	42	-0.086	---	---	9
